# Supplementary material for: Mechanism of Apoptosis in Porcine Ovarian Granulosa Cells Triggered by T-2 Toxin
Source: MDPI journal article supplement (doi:10.3390/genes15050579), 2024-05-01
Supplement: s1 [file s1]

A

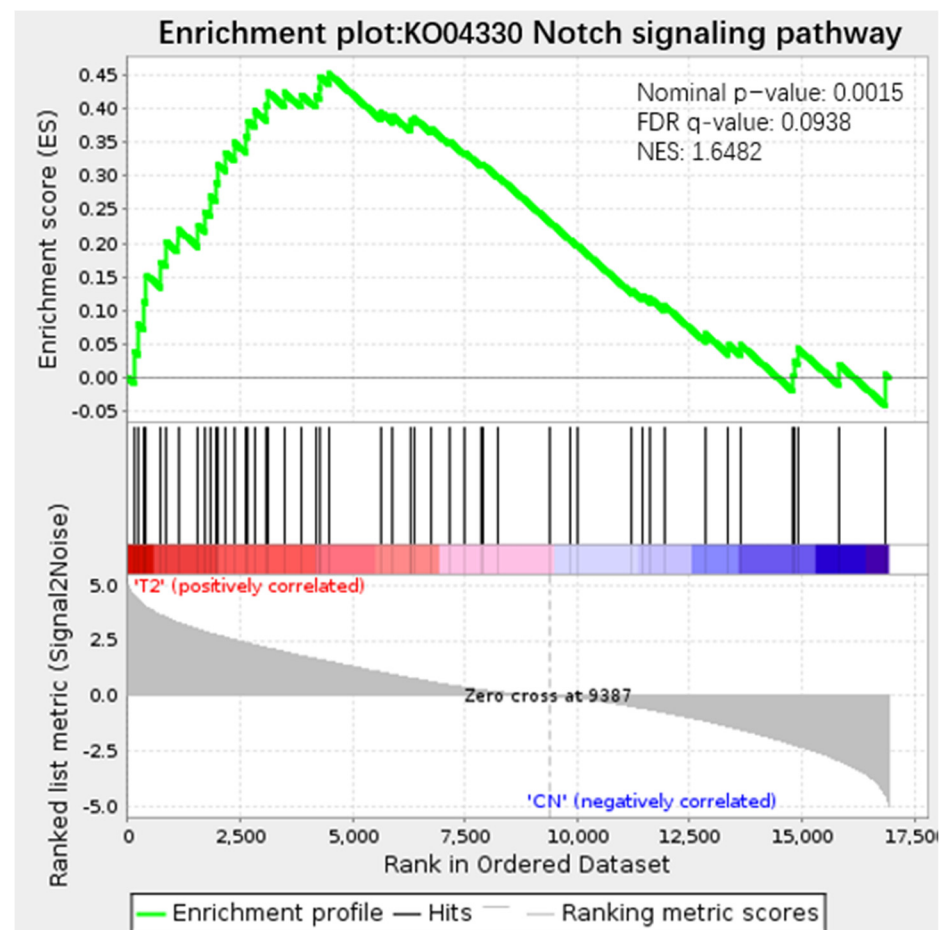

B

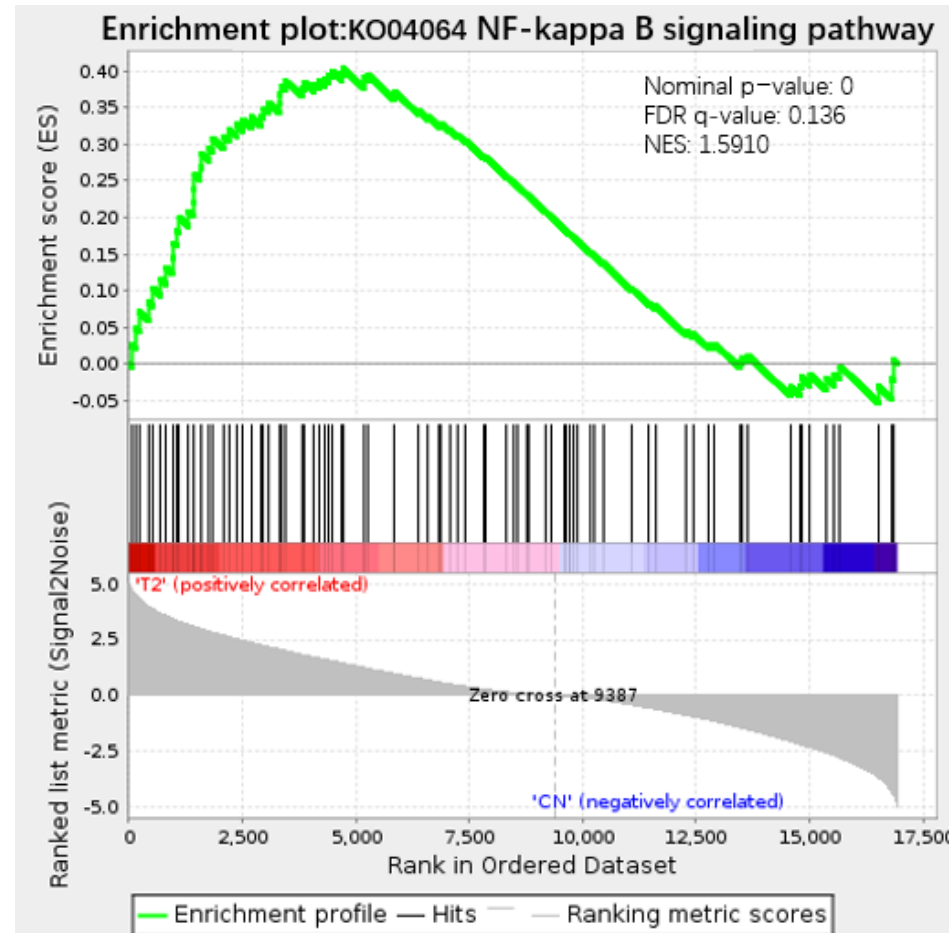

C

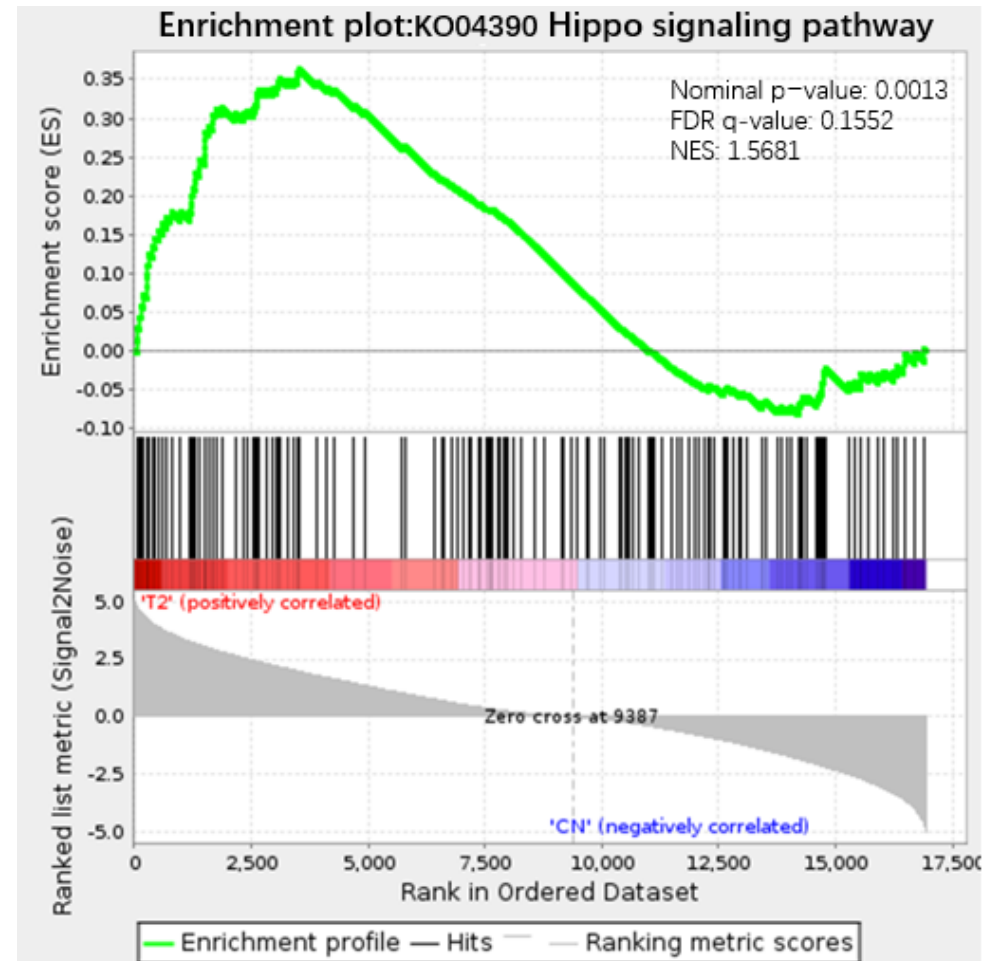

D

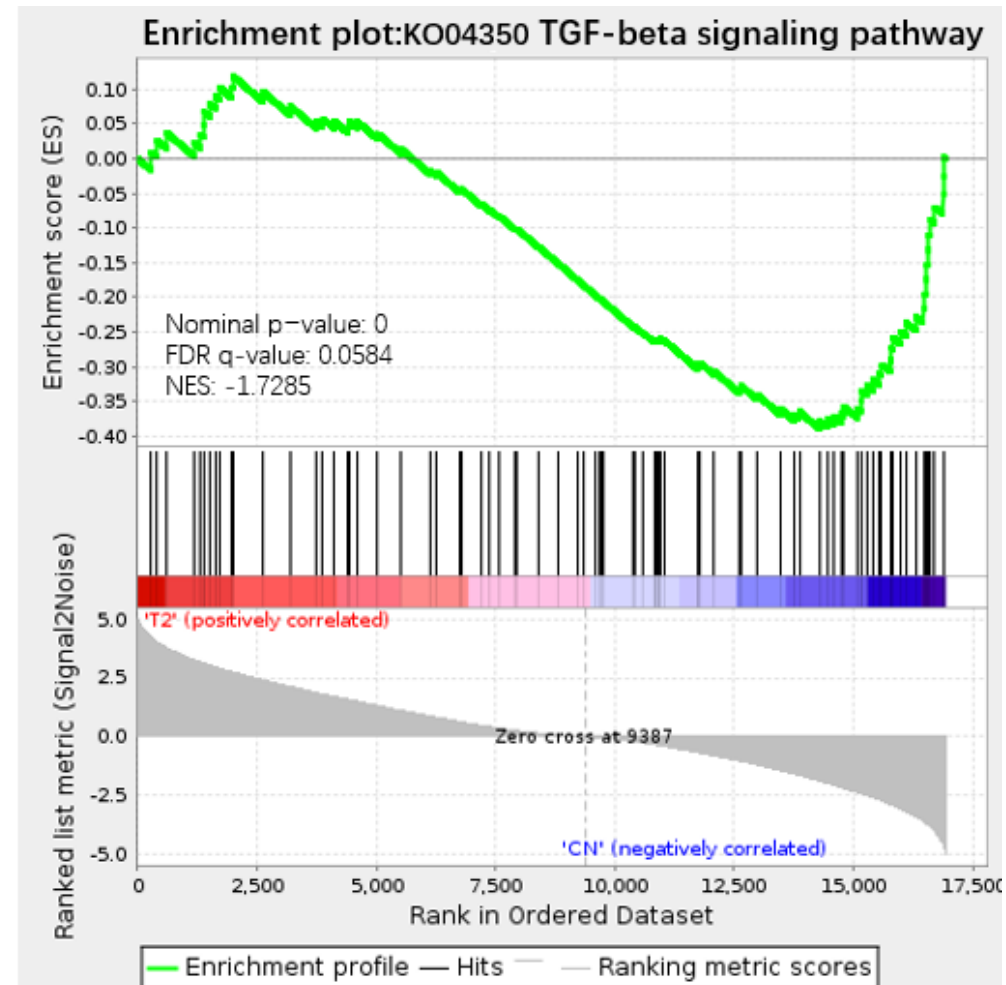

E

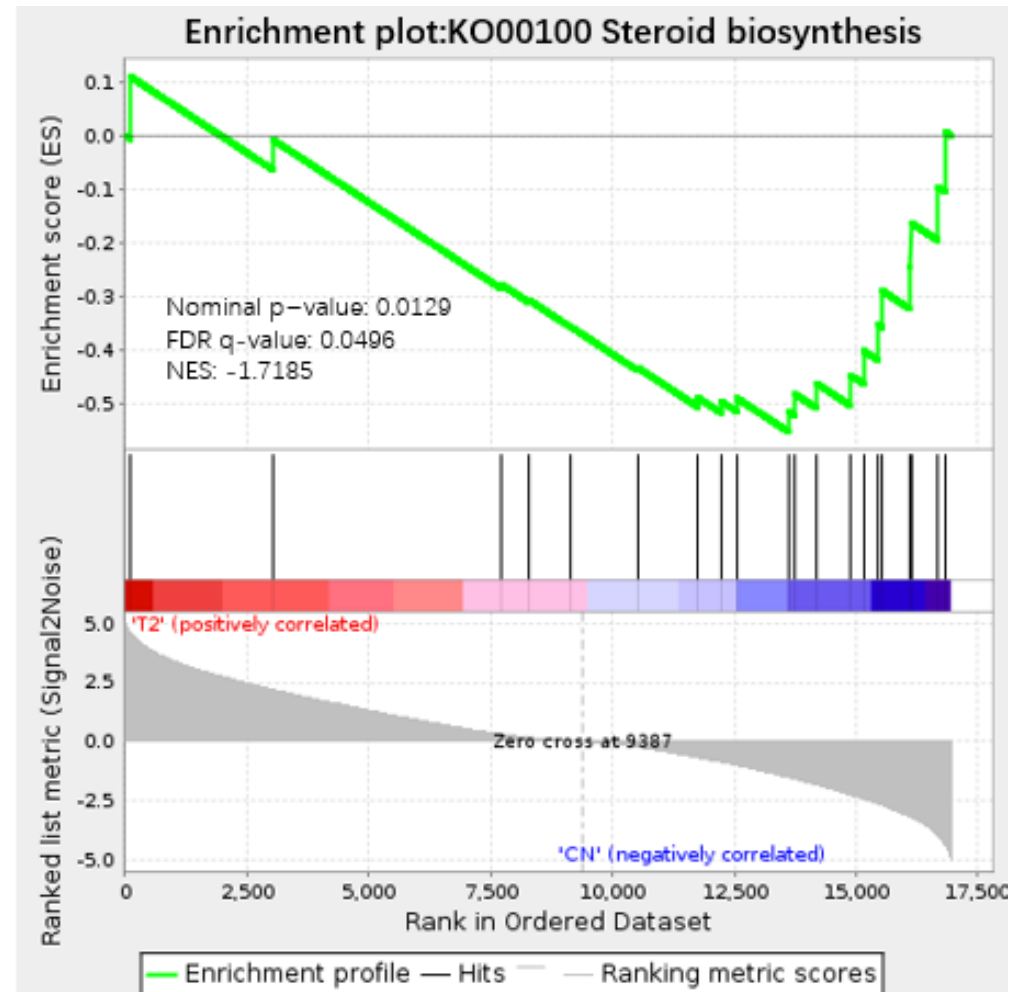

**Figure S1.** Representative results of GSEA plots depicting signaling pathways in T-2-treated pGCs compared to controls. Significantly enriched KEGG pathways in **(A)**Notch signaling pathway, **(B)**NF-kappa B signaling pathway, **(C)**Hippo signaling pathway, **(D)**TGF-beta signaling pathway and **(E)**Steroid biosynthesis. NES stands for normalized enrichment score.
