# Supplementary material for: Mechanism of Apoptosis in Porcine Ovarian Granulosa Cells Triggered by T-2 Toxin
Source: Genes (Basel). 2024 May 1;15(5):579. doi: 10.3390/genes15050579 (PMC11120908; doi:10.3390/genes15050579)
Supplement: Supplementary file 1 [file genes-15-00579-s001.zip › Table S1.xlsx]

## Sheet: Sheet1
Table S1.RNA extraction test results
Production code	Sample	Concentration (ng/ul)	Volume (ul)	Total (μg)	RIN value
R1906490	CN-1	498	41	20.42	9.3
R1906491	CN-2	465	41	19.07	10
R1906492	CN-3	412	42	17.3	9.4
R1906493	T2-1	217	43	9.33	9.4
R1906494	T2-2	169	51	8.62	9.4
R1906495	T2-3	207	44	9.11	9.4
