# Supplementary material for: Mechanism of Apoptosis in Porcine Ovarian Granulosa Cells Triggered by T-2 Toxin
Source: Genes (Basel). 2024 May 1;15(5):579. doi: 10.3390/genes15050579 (PMC11120908; doi:10.3390/genes15050579)
Supplement: Supplementary file 1 [file genes-15-00579-s001.zip › Table S2.xlsx]

## Sheet: Sheet1
Table S2. RNA-seq data quality analysis results
Sample	Before Filter					After Filter
	Clean Data(bp)	Q20(%)	Q30(%)	N (%)	GC (%)	HQ Clean Data(bp)	Q20(%)	Q30(%)	N (%)	GC (%)
CN-1	8546605500	8,344,655,111 (97.64%)	8,047,846,082 (94.16%)	1,288,743 (0.02%)	4,550,166,659 (53.24%)	8224210048	8,107,811,882 (98.58%)	7,867,744,147 (95.67%)	857,487 (0.01%)	4,374,980,30 (53.20%)
CN-2	10701057900	10,470,640,137 (97.85%)	10,123,251,944 (94.60%)	1,615,274 (0.02%)	5,683,390,145 (53.11%)	10322343616	10,187,549,091 (98.69%)	9,903,589,358 (95.94%)	1,073,648 (0.01%)	5,478,669,969 (53.08%)
CN-3	9492620100	9,284,411,677 (97.81%)	8,972,299,225 (94.52%)	1,432,089 (0.02%)	5,053,549,739 (53.24%)	9147813875	9,026,488,425 (98.67%)	8,771,971,839 (95.89%)	949,030 (0.01%)	4,866,908,860 (53.20%)
T2-1	9200478000	8,986,573,094 (97.68%)	8,629,723,676 (93.80%)	116,398 (0.00%)	5,297,380,802 (57.58%)	8966200092	8,808,520,934 (98.24%)	8,480,654,559 (94.58%)	76,791 (0.00%)	5,164,206,168 (57.60%)
T2-2	11777073900	11,502,426,010 (97.67%)	11,043,622,688 (93.77%)	149,353 (0.00%)	6,771,646,291 (57.50%)	11495388165	11,292,317,046 (98.23%)	10,869,516,635 (94.56%)	97,991 (0.00%)	6,610,573,087 (57.51%)
T2-3	9820580400	9,606,046,999 (97.82%)	9,240,899,277 (94.10%)	119,976 (0.00%)	5,675,007,940 (57.79%)	9597271687	9,438,090,029 (98.34%)	9,100,866,523 (94.83%)	81,199 (0.00%)	5,547,064,425 (57.80%)
