# Supplementary material for: Mechanism of Apoptosis in Porcine Ovarian Granulosa Cells Triggered by T-2 Toxin
Source: Genes (Basel). 2024 May 1;15(5):579. doi: 10.3390/genes15050579 (PMC11120908; doi:10.3390/genes15050579)
Supplement: Supplementary file 1 [file genes-15-00579-s001.zip › Table S3.xlsx]

## Sheet: Sheet1
Table S3. Differentially expressed genes of T-2 0 nmol/L and T-2 60 nmol/L in pGCs
Gene ID	Symbol	T-2 0nmol/L_count	T-2 60nmol/L_count	T-2 0nmol/L_fpkm	T-2 60nmol/L_fpkm	log2(FC)	P value	FDR	Significant	Up/Down
ENSSSCG00000000005	-	131.333	825.333	6.24333	36.2833	2.53892	2.5e-116	2.26e-115	yes	up
ENSSSCG00000000006	PPARA	48	126.667	1.39333	3.40333	1.28841	2.17e-13	4.58e-13	yes	up
ENSSSCG00000000007	TRMU	316	811	8.16	20.4533	1.32569	5.65e-30	1.69e-29	yes	up
ENSSSCG00000000010	FBLN1	1327	251.667	13.9733	2.48333	-2.49233	5.59e-177	8.99e-176	yes	down
ENSSSCG00000000014	FAM118A	1099	2393	18.4	37.26	1.01792	3.21e-63	1.55e-62	yes	up
ENSSSCG00000000018	-	28365.7	9676	299.107	106.177	-1.49419	5.84e-223	1.44e-221	yes	down
ENSSSCG00000000019	NUP50	2444	5904.67	18.3667	41.03	1.15959	8.97e-56	3.94e-55	yes	up
ENSSSCG00000000020	PHF21B	7	43.3333	0.2	1.15	2.52356	6.11e-15	1.34e-14	yes	up
ENSSSCG00000000022	-	107	436.333	6.15	22.9767	1.90151	1.38e-54	5.97e-54	yes	up
ENSSSCG00000000024	PARVB	104.667	375.333	4.06333	13.5167	1.734	2.48e-53	1.06e-52	yes	up
ENSSSCG00000000029	SCUBE1	134.333	44	1.84667	0.58	-1.6708	3.38e-20	8.38e-20	yes	down
ENSSSCG00000000031	MCAT	236.667	1019.33	5.38667	22.1567	2.04028	9.5e-98	6.98e-97	yes	up
ENSSSCG00000000039	POLDIP3	3407.67	10196.7	39.3633	109.347	1.47398	3.78e-142	4.45e-141	yes	up
ENSSSCG00000000046	CYP2D25	6.66667	22	0.153333	0.456667	1.57447	4.43e-05	7.11e-05	yes	up
ENSSSCG00000000050	NAGA	1222.67	670.277	29.8733	13.3833	-1.15842	1.37e-32	4.27e-32	yes	down
ENSSSCG00000000061	PMM1	351.333	1570	9.45333	38.91	2.04125	1.96e-111	1.66e-110	yes	up
ENSSSCG00000000062	CSDC2	439.667	954.333	8.20333	16.4267	1.00176	7.9e-29	2.3e-28	yes	up
ENSSSCG00000000063	POLR3H	309	1309.33	5.05667	18.8	1.89447	1.34e-118	1.24e-117	yes	up
ENSSSCG00000000068	EP300	1786	7147.33	9.96667	37.34	1.90554	7.39e-121	7.01e-120	yes	up
ENSSSCG00000000077	ADSL	636.667	3902	14.99	85.4633	2.51131	0	0	yes	up
ENSSSCG00000000079	-	98.6667	819.667	0.663333	5.11	2.94552	1.22e-123	1.2e-122	yes	up
ENSSSCG00000000082	CACNA1I	2.66667	37.3333	0.0166667	0.22	3.72247	3.42e-17	7.91e-17	yes	up
ENSSSCG00000000083	RPS19BP1	408.333	1182	20.3767	54.0267	1.40675	2.04e-39	7.1e-39	yes	up
ENSSSCG00000000084	ATF4	14941.3	38405.7	351.773	836.643	1.24997	5.72e-109	4.75e-108	yes	up
ENSSSCG00000000087	TAB1	706	2970	4.46667	17.51	1.97091	8.78e-199	1.77e-197	yes	up
ENSSSCG00000000089	-	0	3.43	0.001	0.156667	7.29155	0.00644908	0.00913193	yes	up
ENSSSCG00000000092	NPTXR	169	1598.67	1.25333	11.1733	3.15622	2.73e-172	4.22e-171	yes	up
ENSSSCG00000000094	SUN2	1553.59	711.197	15.4567	6.55333	-1.23793	6.9e-61	3.25e-60	yes	down
ENSSSCG00000000095	GTPBP1	759.073	2674.8	8.36667	28.97	1.79183	6.1e-126	6.12e-125	yes	up
ENSSSCG00000000105	KDELR3	7296.33	960.667	171.13	20.89	-3.03421	1.17785249968553e-319	6.46141521959411e-318	yes	down
ENSSSCG00000000106	KCNJ4	30.3333	256.333	0.933333	7.17333	2.94218	9.48e-54	4.05e-53	yes	up
ENSSSCG00000000107	-	1753.33	6082.33	18.4533	65.7367	1.83282	1.67e-167	2.47e-166	yes	up
ENSSSCG00000000111	BAIAP2L2	19.6667	226	0.39	4.09667	3.3929	2.24e-74	1.25e-73	yes	up
ENSSSCG00000000113	SLC16A8	7.89333	39.07	0.22	0.976667	2.15036	2.39e-10	4.63e-10	yes	up
ENSSSCG00000000114	PICK1	340.773	954.263	8.06	20.4367	1.34231	3.89e-38	1.33e-37	yes	up
ENSSSCG00000000117	-	69.3333	537.333	1.12333	8.09	2.84835	3.84e-112	3.28e-111	yes	up
ENSSSCG00000000118	MICALL1	965.333	4269.67	15.2533	62.66	2.03842	1.27e-225	3.21e-224	yes	up
ENSSSCG00000000119	EIF3L	6038.67	16930	114.33	271.43	1.24738	9.88e-140	1.13e-138	yes	up
ENSSSCG00000000120	ANKRD54	412.333	1730.33	5.09333	19.7533	1.95541	9.52e-144	1.14e-142	yes	up
ENSSSCG00000000121	GALR3	0	4.33333	0.001	0.146667	7.1964	0.000404955	0.000618358	yes	up
ENSSSCG00000000131	ELFN2	2.66667	158.667	0.0433333	2.43	5.80934	7.8e-87	5.1e-86	yes	up
ENSSSCG00000000133	TST	199.333	461.02	4.72333	11.2533	1.25248	2.69e-26	7.52e-26	yes	up
ENSSSCG00000000135	KCTD17	165	385	4.38333	9.57	1.12649	4.56e-28	1.31e-27	yes	up
ENSSSCG00000000137	NCF4	15.6667	6.66667	0.44	0.17	-1.37197	0.00153083	0.00225998	yes	down
ENSSSCG00000000141	EIF3D	4569.33	19401	29.8	116.843	1.97119	2.57e-173	4.01e-172	yes	up
ENSSSCG00000000146	MYH11	24112.9	1059.21	148.65	6.29333	-4.56195	0	0	yes	down
ENSSSCG00000000148	-	121.013	681.923	1.09333	5.7	2.38223	2.47e-57	1.11e-56	yes	up
ENSSSCG00000000158	RTCB	2005	6575	20.9633	64.1167	1.61283	5.09e-174	8.02e-173	yes	up
ENSSSCG00000000161	PWP1	616	1892.33	16.79	48.25	1.52293	2.96e-94	2.11e-93	yes	up
ENSSSCG00000000162	BTBD11	1	82.6667	0.01	0.673333	6.07325	5.61e-51	2.32e-50	yes	up
ENSSSCG00000000176	DDX23	1519.62	4189.19	11.1433	28.5967	1.35967	1.51e-122	1.47e-121	yes	up
ENSSSCG00000000182	WNT10B	39.6667	674.333	0.366667	5.58333	3.92859	1.68e-192	3.21e-191	yes	up
ENSSSCG00000000183	WNT1	0	3	0.001	0.19	7.56986	0.00719459	0.0101536	yes	up
ENSSSCG00000000184	DDN	4	17.6667	0.08	0.31	1.9542	8.98e-06	1.48e-05	yes	up
ENSSSCG00000000186	RHEBL1	20.3333	136.333	0.413333	2.58	2.64199	4.22e-40	1.48e-39	yes	up
ENSSSCG00000000188	DHH	3	9	0.0666667	0.186667	1.48543	0.0105652	0.01474	yes	up
ENSSSCG00000000189	LMBR1L	298.667	1581	5.2	26.95	2.3737	1.78e-160	2.47e-159	yes	up
ENSSSCG00000000191	-	980.377	3259.76	2.62333	8.18667	1.64188	3.75e-78	2.19e-77	yes	up
ENSSSCG00000000195	PRPH	0	5.33333	0.001	0.0833333	6.38082	0.000179971	0.000279828	yes	up
ENSSSCG00000000197	C1QL4	35.9233	755.693	0.67	12.8	4.25584	2.96e-194	5.71e-193	yes	up
ENSSSCG00000000202	MCRS1	748.2	2633.87	13.41	43.88	1.71025	1.32e-137	1.48e-136	yes	up
ENSSSCG00000000203	KCNH3	3.8	88.8	0.04	0.826667	4.36923	3.38e-49	1.37e-48	yes	up
ENSSSCG00000000209	NCKAP5L	782.547	1783.97	6.78333	13.8033	1.02495	9.32e-42	3.36e-41	yes	up
ENSSSCG00000000211	AQP5	1	96	0.0133333	1.34333	6.65464	3.65e-57	1.63e-56	yes	up
ENSSSCG00000000212	AQP6	0	5.66667	0.001	0.08	6.32193	0.000108841	0.000171068	yes	up
ENSSSCG00000000220	-	69.8367	227.41	0.566667	1.72	1.60184	5.26e-26	1.46e-25	yes	up
ENSSSCG00000000228	SCN8A	60	137.667	0.343333	0.726667	1.08168	2.06e-11	4.1e-11	yes	up
ENSSSCG00000000231	ANKRD33	0	4.66667	0.001	0.19	7.56986	0.000454233	0.000691673	yes	up
ENSSSCG00000000232	ACVRL1	3.66667	64.6667	0.06	0.69	3.52356	2.04e-35	6.65e-35	yes	up
ENSSSCG00000000234	GRASP	106	530.667	1.29667	6.05333	2.22292	1.36e-88	9.1e-88	yes	up
ENSSSCG00000000252	KRT8	1333.67	304	14.7933	3.07667	-2.26551	1.54e-86	1e-85	yes	down
ENSSSCG00000000258	RARG	637.333	2265	8.98333	29.49	1.7149	1.23e-117	1.13e-116	yes	up
ENSSSCG00000000260	SOAT2	8	33	0.14	0.563333	2.00856	8.33e-09	1.54e-08	yes	up
ENSSSCG00000000261	IGFBP6	115.667	405.333	3.96667	12.9333	1.7051	1.29e-50	5.29e-50	yes	up
ENSSSCG00000000267	C12orf10	967.36	2766.74	19.28	50.92	1.40113	1.78e-89	1.2e-88	yes	up
ENSSSCG00000000271	AMHR2	8	1.66667	0.19	0.0366667	-2.37346	0.000622749	0.000941175	yes	down
ENSSSCG00000000274	PCBP2	4760.35	10425.6	139.687	311.263	1.15594	1.27e-68	6.65e-68	yes	up
ENSSSCG00000000275	MAP3K12	235.313	1384.7	2.27333	13.7233	2.59375	6.2e-187	1.12e-185	yes	up
ENSSSCG00000000276	TARBP2	482.667	1093.33	12.2167	27.2433	1.15705	1.48e-43	5.48e-43	yes	up
ENSSSCG00000000278	-	1246.33	3588.33	7.50667	20.3667	1.43997	2.78e-86	1.8e-85	yes	up
ENSSSCG00000000288	-	4399	1592	32.5233	10.9967	-1.56441	1.39e-118	1.29e-117	yes	down
ENSSSCG00000000292	ZNF385A	78.6667	184.333	1.4	2.86	1.03059	4.8e-15	1.06e-14	yes	up
ENSSSCG00000000298	PPP1R1A	12	38	0.61	1.77667	1.54229	9.41e-08	1.68e-07	yes	up
ENSSSCG00000000373	CDK2	320.017	172.077	4.40667	2.18667	-1.01095	1.94e-22	5.02e-22	yes	down
ENSSSCG00000000376	SUOX	374.333	164.333	6.79667	2.66667	-1.34979	6.16e-26	1.71e-25	yes	down
ENSSSCG00000000377	-	3874.63	12795.1	87.2567	286.803	1.71672	4.31e-171	6.57e-170	yes	up
ENSSSCG00000000384	NABP2	671.387	2044.43	11.1567	32.4067	1.53838	1.45e-74	8.1e-74	yes	up
ENSSSCG00000000386	-	2217.58	8383	10.39	37.2233	1.84101	1.58e-207	3.41e-206	yes	up
ENSSSCG00000000393	PAN2	413.907	1273.35	2.7	9.05	1.74496	1.41e-79	8.41e-79	yes	up
ENSSSCG00000000399	TIMELESS	142.447	62.64	1.16	0.473333	-1.2932	6.48e-19	1.56e-18	yes	down
ENSSSCG00000000400	MIP	0.333333	4.33333	0.00666667	0.0733333	3.45943	0.00315834	0.00456217	yes	up
ENSSSCG00000000402	RBMS2	1190.33	613.333	20.3233	9.65333	-1.07404	7.36e-49	2.96e-48	yes	down
ENSSSCG00000000411	NAB2	643.467	1872.48	10.3	27.7067	1.42759	9.61e-48	3.79e-47	yes	up
ENSSSCG00000000413	MYO1A	4	45.6667	0.0466667	0.453333	3.28011	1.2e-19	2.93e-19	yes	up
ENSSSCG00000000419	-	13	78	0.16	0.766667	2.26053	3.83e-23	1.01e-22	yes	up
ENSSSCG00000000436	PIP4K2C	262.74	850.343	2.45	7.47	1.60833	4.59e-56	2.02e-55	yes	up
ENSSSCG00000000437	ARHGAP9	33.0833	197.327	0.54	3.04	2.49304	2.85e-54	1.23e-53	yes	up
ENSSSCG00000000439	KIF5A	97.26	499.323	0.616667	2.97333	2.26952	2.68e-80	1.62e-79	yes	up
ENSSSCG00000000442	INHBE	31.01	0.31	1.22	0.0133333	-6.5157	3.11e-23	8.19e-23	yes	down
ENSSSCG00000000443	GLI1	58.5733	28.1033	0.453333	0.203333	-1.15673	2.94e-07	5.14e-07	yes	down
ENSSSCG00000000455	LRIG3	20.3333	46	0.21	0.426667	1.02272	1.04e-05	1.72e-05	yes	up
ENSSSCG00000000456	SLC16A7	384	77.6667	3.77667	1.18667	-1.6702	1.49e-60	7e-60	yes	down
ENSSSCG00000000458	MON2	1711.67	810	11.2833	4.97333	-1.18191	1.54e-48	6.17e-48	yes	down
ENSSSCG00000000466	XPOT	4591.67	1454.33	45.7233	13.5133	-1.75855	1.7e-130	1.79e-129	yes	down
ENSSSCG00000000473	-	926.333	319.667	11.25	3.63667	-1.62924	1.08e-48	4.34e-48	yes	down
ENSSSCG00000000483	-	65	33.3333	1.25333	0.596667	-1.07077	8.38e-06	1.39e-05	yes	down
ENSSSCG00000000487	SLC35E3	182.333	79	1.85333	0.763333	-1.27974	2.65e-15	5.88e-15	yes	down
ENSSSCG00000000500	RAB3IP	106.667	21.6667	2.14	0.426667	-2.32643	5.16e-22	1.33e-21	yes	down
ENSSSCG00000000504	PTPRB	168.333	88.3333	0.71	0.35	-1.02046	9.78e-14	2.08e-13	yes	down
ENSSSCG00000000509	ZFC3H1	820	248.667	4.62667	1.33667	-1.79133	1.01e-71	5.49e-71	yes	down
ENSSSCG00000000510	TMEM19	424	54	6.8	0.986667	-2.7849	2.67e-105	2.14e-104	yes	down
ENSSSCG00000000512	TBC1D15	1127.33	290.333	12.3233	2.69333	-2.19393	4.54e-106	3.67e-105	yes	down
ENSSSCG00000000517	CAPS2	28	6.33333	0.533333	0.136667	-1.96438	1.32e-08	2.42e-08	yes	down
ENSSSCG00000000519	GLIPR1	1528.13	337.6	12.6767	3.02	-2.06955	1.16e-218	2.79e-217	yes	down
ENSSSCG00000000522	-	6032.33	1151.33	145.633	24.6133	-2.56483	3.93e-245	1.17e-243	yes	down
ENSSSCG00000000529	DNM1L	1306.44	586.04	14.84	6.44667	-1.20287	8.9e-49	3.57e-48	yes	down
ENSSSCG00000000530	FGD4	269	84.6667	3.06667	0.933333	-1.71621	2.78e-24	7.46e-24	yes	down
ENSSSCG00000000531	BICD1	645.333	1359.33	5.37667	13.4233	1.31996	1.6e-22	4.15e-22	yes	up
ENSSSCG00000000534	IPO8	1127	318.333	8.58333	2.32	-1.88741	1.24e-91	8.6e-91	yes	down
ENSSSCG00000000536	ERGIC2	1105.53	183.703	20.21	3.94333	-2.35758	6.39e-173	9.93e-172	yes	down
ENSSSCG00000000541	FAR2	76.8033	239.297	0.78	2.59	1.73141	1.46e-29	4.31e-29	yes	up
ENSSSCG00000000549	PPFIBP1	2013.33	779.333	15.8867	5.9	-1.42903	2.2e-60	1.03e-59	yes	down
ENSSSCG00000000551	ARNTL2	300.333	128.667	6.21667	2.49667	-1.31614	1.16e-22	3.01e-22	yes	down
ENSSSCG00000000552	MED21	590.333	193.667	25.2833	7.80667	-1.69541	2.63e-57	1.18e-56	yes	down
ENSSSCG00000000553	TM7SF3	1246.33	239.667	11.8267	2.13	-2.47312	5.43e-130	5.67e-129	yes	down
ENSSSCG00000000554	FGFR1OP2	618.443	143.63	9.57667	2.97	-1.68906	5.38e-75	3.03e-74	yes	down
ENSSSCG00000000559	RASSF8	1320	433.667	14.24	4.81667	-1.56384	1.92e-91	1.33e-90	yes	down
ENSSSCG00000000567	SOX5	35.3333	14.6667	0.556667	0.223333	-1.31762	1.24e-06	2.11e-06	yes	down
ENSSSCG00000000570	C2CD5	751	193	6.54667	1.61	-2.0237	2.02e-74	1.13e-73	yes	down
ENSSSCG00000000571	ABCC9	1	7.33333	0.01	0.0533333	2.41504	0.000762158	0.00114604	yes	up
ENSSSCG00000000573	KCNJ8	0.333333	40.6667	0.00333333	0.303333	6.50779	1.9e-26	5.32e-26	yes	up
ENSSSCG00000000579	GOLT1B	1318	260.333	17.78	3.26667	-2.44436	6.87e-180	1.14e-178	yes	down
ENSSSCG00000000580	RECQL	510.12	169.7	6.02667	1.94	-1.6353	4.72e-58	2.14e-57	yes	down
ENSSSCG00000000605	-	8.33333	0.666667	0.1	0.01	-3.32193	0.00133181	0.00197338	yes	down
ENSSSCG00000000614	GRIN2B	8.33333	33.3333	0.06	0.223333	1.89616	1.57e-05	2.57e-05	yes	up
ENSSSCG00000000625	LRP6	983.333	310.667	7.06	2.12	-1.7356	2.24e-55	9.78e-55	yes	down
ENSSSCG00000000634	STYK1	0	2.66667	0.001	0.0733333	6.1964	0.0119983	0.0166285	yes	up
ENSSSCG00000000635	-	145.333	364.333	6.62333	15.2867	1.20664	3.38e-20	8.38e-20	yes	up
ENSSSCG00000000640	-	0	5.66667	0.001	0.173333	7.43741	5.72e-05	9.12e-05	yes	up
ENSSSCG00000000645	GABARAPL1	3472.67	7546.33	73.08	147.993	1.01798	3.43e-67	1.76e-66	yes	up
ENSSSCG00000000647	OLR1	88.6667	2.66667	2.35667	0.07	-5.07325	6.61e-45	2.5e-44	yes	down
ENSSSCG00000000657	-	8.66667	29	0.19	0.64	1.75207	0.000132759	0.000207716	yes	up
ENSSSCG00000000660	A2M	30212.3	6043	171.837	32.3167	-2.41069	5.07e-277	1.95e-275	yes	down
ENSSSCG00000000661	PHC1	472.84	1088.95	4.94333	11.2467	1.18594	1.12e-39	3.91e-39	yes	up
ENSSSCG00000000665	RIMKLB	2612.68	467.09	25.5233	7.84333	-1.70228	6.24e-260	2.09e-258	yes	down
ENSSSCG00000000672	CLSTN3	46	15	0.58	0.186667	-1.63559	1.37e-09	2.6e-09	yes	down
ENSSSCG00000000675	C1R	80.3867	276.113	1.46667	4.68	1.67397	3.44e-29	1.01e-28	yes	up
ENSSSCG00000000680	GPR162	7.33333	17	0.116667	0.246667	1.08017	0.00737154	0.0103973	yes	up
ENSSSCG00000000681	P3H3	3153.67	962.333	50.81	14.3333	-1.82574	8.83e-115	7.8e-114	yes	down
ENSSSCG00000000682	GNB3	10	35.6667	0.25	0.803333	1.68407	2.43e-08	4.43e-08	yes	up
ENSSSCG00000000683	CDCA3	127.667	57.3333	4.67667	1.94333	-1.26695	7.03e-13	1.46e-12	yes	down
ENSSSCG00000000688	LAG3	4.33333	11	0.0966667	0.213333	1.14202	0.0345024	0.0459139	yes	up
ENSSSCG00000000690	MLF2	4996	11404.3	112.7	239.16	1.08549	4.19e-88	2.79e-87	yes	up
ENSSSCG00000000692	PIANP	0	3.66667	0.001	0.06	5.90689	0.00218317	0.00318559	yes	up
ENSSSCG00000000693	NCAPD2	276.39	812.323	2.16	5.84667	1.43658	7.71e-56	3.39e-55	yes	up
ENSSSCG00000000695	IFFO1	306.457	1128.98	4.54	15.4733	1.76902	4.06e-88	2.7e-87	yes	up
ENSSSCG00000000696	NOP2	857.667	11447.3	13.04	161.2	3.62784	0	0	yes	up
ENSSSCG00000000699	LPAR5	25.3333	197.333	0.44	3.19	2.85798	7e-54	3e-53	yes	up
ENSSSCG00000000700	ACRBP	500.333	1886	4.98667	17.3433	1.79823	2.6e-124	2.58e-123	yes	up
ENSSSCG00000000702	ZNF384	271	922.667	6.82667	21.6533	1.66534	5.77e-88	3.83e-87	yes	up
ENSSSCG00000000704	TAPBPL	966.333	2368	13.0167	37.66	1.53267	3.23e-61	1.53e-60	yes	up
ENSSSCG00000000709	PLEKHG6	0.363333	4.90667	0.00333333	0.0466667	3.80735	0.00191063	0.00280068	yes	up
ENSSSCG00000000712	VWF	37.3367	14.3333	0.113333	0.0433333	-1.38702	2.2e-06	3.72e-06	yes	down
ENSSSCG00000000716	KCNA1	0	3.66667	0.001	0.09	6.49185	0.0021403	0.00312572	yes	up
ENSSSCG00000000717	KCNA6	7	307.667	0.0566667	2.28667	5.3346	2.25e-130	2.36e-129	yes	up
ENSSSCG00000000719	-	1267.29	3535.56	28.6167	74.6433	1.38316	4.92e-116	4.43e-115	yes	up
ENSSSCG00000000720	AKAP3	40.8567	235.977	0.536667	2.41	2.16693	5.08e-49	2.05e-48	yes	up
ENSSSCG00000000722	RAD51AP1	104.397	47.6667	1.26333	0.596667	-1.08224	3.55e-14	7.63e-14	yes	down
ENSSSCG00000000723	-	547.27	210.333	8.00667	2.85333	-1.48855	1.09e-56	4.85e-56	yes	down
ENSSSCG00000000734	-	50.6667	23.3333	0.736667	0.31	-1.24874	9.35e-07	1.61e-06	yes	down
ENSSSCG00000000735	TSPAN9	1038.67	2247.67	10.43	23.3067	1.16	5.37e-56	2.37e-55	yes	up
ENSSSCG00000000736	TEAD4	345.333	1236.33	7.32	22.0767	1.59261	1.84e-95	1.32e-94	yes	up
ENSSSCG00000000737	TULP3	900.333	2247.33	11.7567	28.8067	1.29292	4.83e-67	2.47e-66	yes	up
ENSSSCG00000000742	ITFG2	186.667	1924	1.41667	13.5833	3.26127	1.16e-299	5.39e-298	yes	up
ENSSSCG00000000743	FKBP4	1536	5250	40.4467	128.867	1.67179	1.01e-181	1.71e-180	yes	up
ENSSSCG00000000745	DDX11	115.667	679.693	1.23333	6.72	2.4459	2.75e-129	2.85e-128	yes	up
ENSSSCG00000000746	WASHC1	801	2285.64	23.3433	61.2267	1.39115	2.23e-49	9.03e-49	yes	up
ENSSSCG00000000748	IQSEC3	0.666667	11.6667	0.00333333	0.06	4.16993	1.76e-07	3.11e-07	yes	up
ENSSSCG00000000749	SLC6A12	0.666667	26.6667	0.0133333	0.336667	4.65821	6.28e-15	1.38e-14	yes	up
ENSSSCG00000000759	-	243	104.333	4.57	1.84333	-1.30988	2.23e-20	5.55e-20	yes	down
ENSSSCG00000000764	HDHD5	25	225.667	0.806667	6.89667	3.09585	5.18e-76	2.96e-75	yes	up
ENSSSCG00000000765	IL17RA	1231.33	9657.33	19.8833	144.31	2.85954	0	0	yes	up
ENSSSCG00000000766	CECR2	257.667	1187	1.50333	6.92667	2.204	3.77e-132	4.01e-131	yes	up
ENSSSCG00000000769	BID	1398	3466.33	36.0033	83.3033	1.21024	1.03e-95	7.4e-95	yes	up
ENSSSCG00000000773	TUBA8	106.88	392.533	0.66	2.24	1.76296	7.85e-46	3.01e-45	yes	up
ENSSSCG00000000778	-	146.667	60.3333	1.17	0.453333	-1.36786	4.77e-11	9.42e-11	yes	down
ENSSSCG00000000781	ABCD2	24.6667	8.33333	0.146667	0.0433333	-1.75899	1.84e-05	3e-05	yes	down
ENSSSCG00000000783	SLC2A13	1066.67	201.333	5.97333	1.06	-2.49447	4.57e-130	4.78e-129	yes	down
ENSSSCG00000000789	CNTN1	13.6667	1.66667	0.123333	0.0166667	-2.88753	2.4e-07	4.21e-07	yes	down
ENSSSCG00000000791	-	41.3333	87.6667	0.3	0.606667	1.01594	1.81e-07	3.19e-07	yes	up
ENSSSCG00000000793	PPHLN1	1142.21	440.333	17.0833	5.72667	-1.57682	3.5e-52	1.47e-51	yes	down
ENSSSCG00000000795	ADAMTS20	7.33333	117.333	0.0533333	0.733333	3.78136	9.99e-36	3.28e-35	yes	up
ENSSSCG00000000799	IRAK4	281	85.3333	8.28333	2.36333	-1.80939	2.62e-48	1.04e-47	yes	down
ENSSSCG00000000800	PUS7L	258	111.667	3.9	1.70333	-1.19511	5.97e-21	1.51e-20	yes	down
ENSSSCG00000000802	NELL2	1670.33	82.6667	19.63	1.03333	-4.24768	0	0	yes	down
ENSSSCG00000000806	SCAF11	1588.67	559	12.2267	4.17	-1.55191	1.05e-77	6.15e-77	yes	down
ENSSSCG00000000808	SLC38A2	8062	4075.33	66.2833	31.5933	-1.06903	4.56e-44	1.7e-43	yes	down
ENSSSCG00000000838	SLC41A2	1271.67	131.333	20.6167	2.00333	-3.36334	1.03e-201	2.15e-200	yes	down
ENSSSCG00000000839	ALDH1L2	2006	248.333	24.4467	2.85333	-3.09892	5.95e-207	1.28e-205	yes	down
ENSSSCG00000000840	WASHC4	1193	436.333	9.97	3.35333	-1.572	1.98e-57	8.87e-57	yes	down
ENSSSCG00000000842	KANSL2	583.633	2778.55	10.27	45.4567	2.14606	1.03e-228	2.66e-227	yes	up
ENSSSCG00000000843	TXNRD1	6252	19484.3	66.9733	193.913	1.53375	1.44e-163	2.05e-162	yes	up
ENSSSCG00000000848	GLT8D2	645.333	192.333	13.4133	3.59	-1.90161	3.09e-77	1.79e-76	yes	down
ENSSSCG00000000849	-	6647.67	1052.67	160.29	23.64	-2.76138	2.75e-279	1.08e-277	yes	down
ENSSSCG00000000853	NT5DC3	20	67.6667	0.55	1.74	1.66158	1.79e-11	3.59e-11	yes	up
ENSSSCG00000000857	IGF1	187.667	7.33333	8.74	0.26	-5.07105	1.05e-100	8e-100	yes	down
ENSSSCG00000000859	PARPBP	92.3333	21	1.23	0.256667	-2.26069	3.6e-24	9.64e-24	yes	down
ENSSSCG00000000860	NUP37	227	115.333	3.27667	1.55333	-1.07686	9.44e-19	2.26e-18	yes	down
ENSSSCG00000000862	GNPTAB	3944.67	1403	30.7667	10.4933	-1.5519	4.49e-155	5.9e-154	yes	down
ENSSSCG00000000870	ARL1	2868.62	809.047	35.1167	9.26333	-1.92255	8.12e-179	1.32e-177	yes	down
ENSSSCG00000000874	GAS2L3	122.333	31	1.32333	0.356667	-1.89153	3.25e-27	9.22e-27	yes	down
ENSSSCG00000000877	SCYL2	1171	541.333	11.2133	5.34	-1.0703	3.07e-41	1.1e-40	yes	down
ENSSSCG00000000882	-	0	8	0.001	0.09	6.49185	1.41e-05	2.32e-05	yes	up
ENSSSCG00000000884	APAF1	593	174	3.98667	1.07667	-1.88861	4.09e-67	2.1e-66	yes	down
ENSSSCG00000000887	-	115.12	56.4033	3.41333	1.58333	-1.10822	8.33e-12	1.68e-11	yes	down
ENSSSCG00000000890	NEDD1	870.333	245.667	10.5333	3.49667	-1.59091	5.97e-76	3.41e-75	yes	down
ENSSSCG00000000896	NTN4	184.667	882.333	2.20333	13.0067	2.56149	7.86e-89	5.28e-88	yes	up
ENSSSCG00000000900	VEZT	915	200.333	12.1833	2.49333	-2.28876	1.75e-105	1.4e-104	yes	down
ENSSSCG00000000905	-	992	397.667	57.4267	21.4633	-1.41985	7.04e-55	3.06e-54	yes	down
ENSSSCG00000000906	TMCC3	47	348.333	0.563333	4.05	2.84586	8.34e-75	4.69e-74	yes	up
ENSSSCG00000000915	DCN	5702	288.333	157.07	7.47333	-4.39351	0	0	yes	down
ENSSSCG00000000916	LUM	2120.33	104	13.25	0.606667	-4.44894	0	0	yes	down
ENSSSCG00000000918	EPYC	43.3333	1.33333	1.82333	0.0533333	-5.0954	2.59e-22	6.7e-22	yes	down
ENSSSCG00000000924	-	4	0.333333	0.0633333	0.01	-2.66297	0.00575356	0.00817438	yes	down
ENSSSCG00000000925	C12orf29	197.333	91.3333	2.54333	1.08667	-1.22681	1.2e-20	3.02e-20	yes	down
ENSSSCG00000000926	CEP290	190.77	28.0533	1.09667	0.146667	-2.90251	1.67e-59	7.72e-59	yes	down
ENSSSCG00000000927	TMTC3	1065.56	106.947	7.30333	0.82	-3.15486	5.77e-183	9.91e-182	yes	down
ENSSSCG00000000934	-	12.6667	1.33333	0.0966667	0.01	-3.27302	1.84e-07	3.25e-07	yes	down
ENSSSCG00000000936	SLC6A15	134.333	300	0.77	1.6	1.05514	5.44e-19	1.31e-18	yes	up
ENSSSCG00000000939	ACSS3	444.303	149	5.10333	2.00667	-1.34664	1.21e-50	4.97e-50	yes	down
ENSSSCG00000000952	-	686	248.333	5.82333	2.22333	-1.38912	5.15e-46	1.98e-45	yes	down
ENSSSCG00000000955	TBC1D22A	393.333	1012.33	10.5867	25.5233	1.26957	6.91e-56	3.04e-55	yes	up
ENSSSCG00000000958	DYRK2	724.667	1672.33	7.46333	18.9867	1.34709	2.46e-58	1.12e-57	yes	up
ENSSSCG00000000968	SBF1	5985.41	18772.3	39.93	109.63	1.4571	1.97e-185	3.48e-184	yes	up
ENSSSCG00000000970	PPP6R2	1056.26	3316	12.2	35.0867	1.52404	3.45e-80	2.08e-79	yes	up
ENSSSCG00000000972	TUBGCP6	467.667	2238.67	3.83667	17.3233	2.17479	5.63e-210	1.25e-208	yes	up
ENSSSCG00000000973	SELENOO	607	2810	10.5733	45.0733	2.09184	7.57e-120	7.1e-119	yes	up
ENSSSCG00000000974	-	786.333	2230.33	18.4	48.3867	1.3949	1.31e-80	7.96e-80	yes	up
ENSSSCG00000000975	PANX2	91	339.333	1.14	3.98333	1.80494	2.07e-43	7.64e-43	yes	up
ENSSSCG00000000982	TTLL8	0	2.66667	0.001	0.0433333	5.43741	0.0103194	0.0144113	yes	up
ENSSSCG00000000998	-	255.667	973.667	4.95667	20.45	2.04466	7.15e-96	5.16e-95	yes	up
ENSSSCG00000001004	SLC22A23	496.21	2484.08	3.55	25.4967	2.84442	7.87e-235	2.15e-233	yes	up
ENSSSCG00000001009	RIPK1	1405.88	5657	13.9067	58.5267	2.07332	1.22e-207	2.65e-206	yes	up
ENSSSCG00000001010	-	1149	4364	15.1067	53.3933	1.82147	1.57e-147	1.95e-146	yes	up
ENSSSCG00000001011	SERPINB1	1296.33	3246.67	22.4833	51.0033	1.18174	9.71e-73	5.32e-72	yes	up
ENSSSCG00000001021	RREB1	437.333	2008	3.58667	15.49	2.11062	2.22e-105	1.78e-104	yes	up
ENSSSCG00000001024	RIOK1	540.333	1366.33	5.52333	13.49	1.28828	6.19e-68	3.21e-67	yes	up
ENSSSCG00000001025	DSP	1694.67	6305.67	9.83	27.2267	1.46976	2.63e-184	4.57e-183	yes	up
ENSSSCG00000001027	BMP6	55.7733	254	0.463333	1.98	2.09538	1.48e-49	6.02e-49	yes	up
ENSSSCG00000001033	SLC35B3	292.667	152.333	4.58	2.19	-1.06442	3.51e-20	8.72e-20	yes	down
ENSSSCG00000001036	TFAP2A	2	47	0.06	1.02667	4.09686	2.32e-27	6.61e-27	yes	up
ENSSSCG00000001045	ELOVL2	5	20.6667	0.06	0.203333	1.76081	2.03e-06	3.44e-06	yes	up
ENSSSCG00000001049	HIVEP1	283	743.333	1.33333	3.25333	1.28688	2.78e-37	9.38e-37	yes	up
ENSSSCG00000001052	PHACTR1	39.6667	93.3333	0.45	1.02667	1.18997	1.15e-10	2.24e-10	yes	up
ENSSSCG00000001053	TBC1D7	310.667	726.333	8.26333	17.5467	1.0864	3.32e-27	9.41e-27	yes	up
ENSSSCG00000001063	-	77.3333	532.667	1.01333	6.61	2.70554	5.92e-80	3.56e-79	yes	up
ENSSSCG00000001068	CAP2	523.667	59.6667	6.67667	0.726667	-3.19976	3.79e-109	3.15e-108	yes	down
ENSSSCG00000001073	TPMT	229.333	33	4.72	0.633333	-2.89775	3.26e-59	1.5e-58	yes	down
ENSSSCG00000001075	-	1711.33	337	24.2833	4.44	-2.45133	4.21e-134	4.56e-133	yes	down
ENSSSCG00000001078	MBOAT1	1631.67	646.667	16.05	5.95667	-1.43	2.95e-78	1.73e-77	yes	down
ENSSSCG00000001087	MRS2	633.433	246.887	6.6	3.27333	-1.01171	4.15e-35	1.35e-34	yes	down
ENSSSCG00000001089	GPLD1	29.9	9.44667	0.193333	0.0566667	-1.77052	3.58e-08	6.49e-08	yes	down
ENSSSCG00000001090	ALDH5A1	632.333	270.667	7.57667	2.52	-1.58814	3.9e-47	1.53e-46	yes	down
ENSSSCG00000001095	GMNN	374	121.667	10.73	3.31	-1.69675	2.92e-44	1.09e-43	yes	down
ENSSSCG00000001099	CMAH	24.3333	3.33333	0.353333	0.0466667	-2.92057	1.26e-12	2.61e-12	yes	down
ENSSSCG00000001107	SLC17A1	12.46	1.53333	0.09	0.0133333	-2.75489	4.99e-07	8.66e-07	yes	down
ENSSSCG00000001132	BTN1A1	1	5.66667	0.01	0.05	2.32193	0.0138035	0.0190556	yes	up
ENSSSCG00000001203	ZSCAN9	9	27.3333	0.216667	0.596667	1.46145	2.09e-05	3.41e-05	yes	up
ENSSSCG00000001204	-	46.6667	212.333	0.796667	3.40667	2.09631	1.37e-29	4.05e-29	yes	up
ENSSSCG00000001206	ZSCAN26	148.667	370.333	2.58	6.00667	1.21919	4.42e-27	1.25e-26	yes	up
ENSSSCG00000001219	TRIM27	1670	5703	22.9667	75.2367	1.71189	6.42e-175	1.01e-173	yes	up
ENSSSCG00000001229	-	11033.5	31865	84.86	222.503	1.39067	7.04e-144	8.44e-143	yes	up
ENSSSCG00000001231	-	89.1067	402.827	5.05333	21.1167	2.06307	2.86e-65	1.42e-64	yes	up
ENSSSCG00000001233	TRIM26	285	1825	7.07667	42.3067	2.57974	2.3e-214	5.35e-213	yes	up
ENSSSCG00000001234	TRIM10	0	4.66667	0.001	0.05	5.64386	0.000781028	0.00117317	yes	up
ENSSSCG00000001235	TRIM15	0.666667	10	0.00333333	0.253333	6.24793	1.59e-06	2.71e-06	yes	up
ENSSSCG00000001245	ZNRD1	90.3333	274.667	4.81333	13.42	1.47928	1.01e-29	2.99e-29	yes	up
ENSSSCG00000001342	-	75.3333	281	1.90333	6.48667	1.76895	6.27e-36	2.07e-35	yes	up
ENSSSCG00000001346	ABCF1	3083.67	7106	40.34	86.3733	1.09837	1.25e-85	8.05e-85	yes	up
ENSSSCG00000001347	PPP1R10	674.667	6152.67	8.26333	69.89	3.08029	0	0	yes	up
ENSSSCG00000001362	MDC1	524.333	1554.33	3.49	9.57667	1.4563	1.47e-88	9.87e-88	yes	up
ENSSSCG00000001372	GNL1	1041.67	3394	17.5333	52.4033	1.57956	1.37e-148	1.71e-147	yes	up
ENSSSCG00000001376	DHX16	506.447	1860.04	2.55333	8.72667	1.77305	8.07e-141	9.38e-140	yes	up
ENSSSCG00000001383	GTF2H4	227.333	604.333	5.51667	13.7267	1.31511	9.45e-38	3.21e-37	yes	up
ENSSSCG00000001391	CCHCR1	170.333	377.667	2.55333	5.34667	1.06626	3.3e-16	7.49e-16	yes	up
ENSSSCG00000001394	-	379.873	118.89	11.1433	3.85	-1.53325	9.1e-52	3.8e-51	yes	down
ENSSSCG00000001401	-	34.6567	18	0.916667	0.45	-1.02647	0.000397085	0.00060656	yes	down
ENSSSCG00000001402	NFKBIL1	622.01	3918.33	16.9033	98.5167	2.54306	1.6648454546027e-310	0	yes	up
ENSSSCG00000001403	LTA	1.33333	10.6667	0.0566667	0.276667	2.28758	1.57e-05	2.57e-05	yes	up
ENSSSCG00000001405	LTB	58	166.667	1.22333	3.26667	1.417	1.1e-20	2.77e-20	yes	up
ENSSSCG00000001409	PRRC2A	4926.33	16846.3	30.9033	97.7867	1.66188	1.89e-164	2.71e-163	yes	up
ENSSSCG00000001411	APOM	56	132.667	1.24667	2.76667	1.15007	5.93e-12	1.2e-11	yes	up
ENSSSCG00000001420	EHMT2	653.98	2216.93	7.36	23.5	1.67488	2.35e-134	2.56e-133	yes	up
ENSSSCG00000001421	ZBTB12	81	323	1.70667	6.35	1.89558	1.2e-40	4.27e-40	yes	up
ENSSSCG00000001422	C2	101.553	43.8567	1.41667	0.573333	-1.30505	2.49e-13	5.24e-13	yes	down
ENSSSCG00000001423	NELFE	938.983	2351.97	22.9767	52.8633	1.2021	2.83e-52	1.19e-51	yes	up
ENSSSCG00000001426	STK19	306.487	1762.13	6.65333	35.4667	2.41431	8.96e-197	1.78e-195	yes	up
ENSSSCG00000001428	CYP21A2	4.66667	19.6667	0.0966667	0.37	1.93643	1.34e-05	2.19e-05	yes	up
ENSSSCG00000001430	ATF6B	1651	5241.33	28.6167	85.7267	1.58289	8.2e-122	7.9e-121	yes	up
ENSSSCG00000001434	EGFL8	6	16	0.193333	0.45	1.21883	0.011383	0.0158159	yes	up
ENSSSCG00000001439	GPSM3	0	7.33333	0.001	0.23	7.84549	4.51e-06	7.54e-06	yes	up
ENSSSCG00000001453	HLA-DRA	4	0.666667	0.12	0.0166667	-2.848	0.0273347	0.036701	yes	down
ENSSSCG00000001455	-	1	4.33333	0.0566667	0.136667	1.27009	0.0284201	0.038119	yes	up
ENSSSCG00000001459	HLA-DOB	10.3333	76	0.163333	1.76	3.42968	1.32e-22	3.44e-22	yes	up
ENSSSCG00000001463	PSMB9	53.2633	849.537	1.63333	24.3067	3.89546	6.62e-226	1.67e-224	yes	up
ENSSSCG00000001469	SLA-DMB	18.3333	4.33333	0.533333	0.11	-2.27753	3.3e-05	5.32e-05	yes	down
ENSSSCG00000001471	BRD2	5604.33	26638.3	48.35	214.113	2.14679	0	0	yes	up
ENSSSCG00000001473	COL11A2	0.333333	28.6667	0.00333333	0.17	5.67243	1.39e-15	3.12e-15	yes	up
ENSSSCG00000001474	RXRB	880.377	2198.35	11.46	26.7133	1.22095	1.39e-66	7.05e-66	yes	up
ENSSSCG00000001477	RING1	894.667	2329	15.5867	38.5567	1.30667	6.27e-85	4e-84	yes	up
ENSSSCG00000001485	-	364	7	5.43	0.09	-5.91488	8.27e-185	1.45e-183	yes	down
ENSSSCG00000001497	ZNF451	486.667	1532	2.88667	8.57667	1.57101	1.29e-70	6.89e-70	yes	up
ENSSSCG00000001498	BEND6	702.333	233.333	11.3767	3.54	-1.68426	2.16e-62	1.04e-61	yes	down
ENSSSCG00000001503	B3GALT4	74	21.3333	1.92333	0.52	-1.88703	1.79e-17	4.15e-17	yes	down
ENSSSCG00000001504	WDR46	708.077	4970.74	5.41333	35.0967	2.69674	6.8395390557936e-310	3.48e-308	yes	up
ENSSSCG00000001507	TAPBP	1787.33	4246	30.36	70.0867	1.20697	2.39e-79	1.43e-78	yes	up
ENSSSCG00000001509	DAXX	947.667	2438.33	14.84	35.67	1.26522	6.93e-73	3.8e-72	yes	up
ENSSSCG00000001511	PHF1	445.927	1050.66	3.97667	8.60667	1.11389	4.08e-34	1.3e-33	yes	up
ENSSSCG00000001512	CUTA	963.407	2359.68	33.5067	77.19	1.20397	4.93e-45	1.86e-44	yes	up
ENSSSCG00000001513	SYNGAP1	283.667	1091	2.89667	10.3733	1.84041	1.43e-100	1.09e-99	yes	up
ENSSSCG00000001516	BAK1	1478.33	9104	18.32	119.36	2.70383	0	0	yes	up
ENSSSCG00000001517	-	7.66667	46.6667	0.33	1.84	2.47917	1.53e-14	3.32e-14	yes	up
ENSSSCG00000001518	ITPR3	1005.2	24490.4	3.98667	90.5233	4.50503	0	0	yes	up
ENSSSCG00000001520	LEMD2	1319.67	5881	13.0767	50.9467	1.96199	1.93e-193	3.71e-192	yes	up
ENSSSCG00000001523	GRM4	0	33	0.001	0.356667	8.47843	4.91e-24	1.31e-23	yes	up
ENSSSCG00000001531	SNRPC	1456.32	3304.67	76.7767	160.657	1.06524	1.47e-54	6.38e-54	yes	up
ENSSSCG00000001534	ANKS1A	780	1928.33	5.75667	14.8833	1.37039	1.97e-71	1.06e-70	yes	up
ENSSSCG00000001546	-	243.903	829.84	3.60667	11.7733	1.70678	1.73e-69	9.15e-69	yes	up
ENSSSCG00000001550	-	0	46	0.001	1.62	10.6618	5.7e-23	1.49e-22	yes	up
ENSSSCG00000001559	PNPLA1	9	1	0.256667	0.0266667	-3.26679	4.9e-05	7.83e-05	yes	down
ENSSSCG00000001567	CPNE5	52	15.3333	0.733333	0.18	-2.02647	2.39e-12	4.91e-12	yes	down
ENSSSCG00000001579	CMTR1	1384.98	3580.43	17.66	42.6433	1.27183	8.06e-100	6.08e-99	yes	up
ENSSSCG00000001582	MDGA1	1543	484.667	8.31333	2.43333	-1.77249	5.76e-129	5.97e-128	yes	down
ENSSSCG00000001588	DNAH8	2.66667	0	0.00666667	0.001	-2.73697	0.0118711	0.0164616	yes	down
ENSSSCG00000001596	-	117.667	293.667	1.71	4	1.226	5.07e-22	1.3e-21	yes	up
ENSSSCG00000001597	LRFN2	1	253.667	0.0133333	2.97333	7.8009	4.07e-134	4.43e-133	yes	up
ENSSSCG00000001612	-	3	10.3333	0.0233333	0.0766667	1.71621	0.00440496	0.00631125	yes	up
ENSSSCG00000001620	MDFI	20.3333	111.667	0.36	1.87667	2.3821	3.66e-23	9.63e-23	yes	up
ENSSSCG00000001629	USP49	6	18	0.113333	0.34	1.58496	0.00314679	0.0045469	yes	up
ENSSSCG00000001636	GUCA1A	15	6	0.343333	0.103333	-1.7323	0.000976304	0.00145706	yes	down
ENSSSCG00000001639	TRERF1	124	495.667	0.713333	2.64333	1.88971	2.11e-64	1.04e-63	yes	up
ENSSSCG00000001646	-	228	562.333	1.42667	3.30667	1.21273	5.07e-39	1.75e-38	yes	up
ENSSSCG00000001651	CNPY3	211.667	694	2.19	6.69667	1.61251	2.82e-66	1.42e-65	yes	up
ENSSSCG00000001653	PEX6	460.47	1388.47	5.34333	14.7167	1.46164	1.03e-83	6.49e-83	yes	up
ENSSSCG00000001656	RRP36	769.667	2494	10.45	31.2133	1.57866	4.2e-99	3.14e-98	yes	up
ENSSSCG00000001658	MRPL2	581.12	3253.02	22.09	114.993	2.38008	2.11e-284	8.64e-283	yes	up
ENSSSCG00000001664	TTBK1	11.6667	478	0.11	4.31333	5.29323	2.68e-199	5.46e-198	yes	up
ENSSSCG00000001676	-	42.1733	236.557	1.42	7.42	2.38553	3.66e-59	1.68e-58	yes	up
ENSSSCG00000001679	XPO5	3884.25	14199.2	30.1333	104.73	1.79724	1.05e-233	2.82e-232	yes	up
ENSSSCG00000001680	ABCC10	393.667	1719.33	3.04	12.8767	2.08262	1.05e-97	7.7e-97	yes	up
ENSSSCG00000001682	DLK2	2	270	0.04	4.87333	6.92877	5.5e-139	6.28e-138	yes	up
ENSSSCG00000001688	TJAP1	475.55	1808.8	5.36	18.5567	1.79163	4.17e-121	3.98e-120	yes	up
ENSSSCG00000001689	GTPBP2	3373	8466	58.0733	136.807	1.23619	8.96e-82	5.49e-81	yes	up
ENSSSCG00000001692	MRPS18A	614.667	3079.73	16.1033	74.2333	2.20471	2.31e-160	3.2e-159	yes	up
ENSSSCG00000001696	-	720	2823	23.8333	83.65	1.81138	1.69e-99	1.27e-98	yes	up
ENSSSCG00000001697	TMEM63B	2175	8159.33	28.3433	104.383	1.88081	3.76e-180	6.25e-179	yes	up
ENSSSCG00000001701	HSP90AB1	21369.9	62930.3	288.62	797.487	1.46629	5.83e-165	8.43e-164	yes	up
ENSSSCG00000001703	NFKBIE	671.667	7384.33	11.2067	113.607	3.34162	0	0	yes	up
ENSSSCG00000001706	AARS2	164	1029.33	1.71667	10.7533	2.6471	2.84e-151	3.62e-150	yes	up
ENSSSCG00000001715	ENPP5	233.007	5.43333	2.19	0.0466667	-5.55239	1.3e-134	1.42e-133	yes	down
ENSSSCG00000001716	RCAN2	2480.66	1256.23	32.02	15.06	-1.08825	5.82e-62	2.77e-61	yes	down
ENSSSCG00000001718	CYP39A1	507.397	59.3333	10.07	1.25	-3.01006	1.23e-131	1.3e-130	yes	down
ENSSSCG00000001720	SLC25A27	1046.6	276	7.75667	2.04667	-1.92216	2.91e-100	2.21e-99	yes	down
ENSSSCG00000001727	TNFRSF21	154.667	782.667	1.71333	8.13	2.24645	1.95e-113	1.69e-112	yes	up
ENSSSCG00000001729	PTCHD4	0	3.33333	0.001	0.0366667	5.1964	0.00359893	0.00518138	yes	up
ENSSSCG00000001731	CENPQ	56	18.6667	1.29	0.393333	-1.71355	5.26e-10	1.01e-09	yes	down
ENSSSCG00000001732	MUT	625	90.3333	8.00667	1.15333	-2.79539	3.71e-123	3.63e-122	yes	down
ENSSSCG00000001734	-	36	111.667	1.11	3.26333	1.55579	3.58e-17	8.28e-17	yes	up
ENSSSCG00000001751	CHRNA5	2.66667	10.74	0.0666667	0.243333	1.8679	0.000633815	0.000957473	yes	up
ENSSSCG00000001752	CHRNA3	11.6667	272.593	0.0933333	2.28	4.6105	7.05e-127	7.16e-126	yes	up
ENSSSCG00000001753	CHRNB4	2.33333	21.3333	0.07	0.586667	3.06711	3.23e-09	6.06e-09	yes	up
ENSSSCG00000001756	IREB2	839.667	228	9.79667	2.49333	-1.97422	2.56e-63	1.24e-62	yes	down
ENSSSCG00000001760	ACSBG1	31.34	5.12667	0.433333	0.0666667	-2.70044	7.07e-13	1.47e-12	yes	down
ENSSSCG00000001769	MORF4L1	7419.67	3154	159.173	63.2267	-1.33199	4.76e-86	3.09e-85	yes	down
ENSSSCG00000001771	RASGRF1	8.33333	37.6667	0.04	0.173333	2.11548	1.26e-09	2.4e-09	yes	up
ENSSSCG00000001773	TMED3	5376.67	2642.67	125.823	57.3267	-1.13412	5.17e-52	2.17e-51	yes	down
ENSSSCG00000001775	KIAA1024	0	2.66667	0.001	0.0166667	4.05889	0.0119898	0.0166181	yes	up
ENSSSCG00000001779	-	1594.67	564.333	33.65	10.16	-1.72771	4.12e-79	2.44e-78	yes	down
ENSSSCG00000001793	ADAMTSL3	4593.67	1368.33	27.1933	8.03333	-1.75918	1.58e-179	2.6e-178	yes	down
ENSSSCG00000001795	SH3GL3	248.333	137.667	6.05667	2.63667	-1.19981	2.96e-13	6.2e-13	yes	down
ENSSSCG00000001798	BNC1	1.66667	42.6667	0.0166667	0.48	4.848	1.01e-25	2.78e-25	yes	up
ENSSSCG00000001800	TM6SF1	33.1533	4.15	0.79	0.126667	-2.64082	1.56e-13	3.29e-13	yes	down
ENSSSCG00000001801	BTBD1	1695	899	19.2067	9.55	-1.00803	1.2e-32	3.74e-32	yes	down
ENSSSCG00000001804	HOMER2	49.3333	117.667	0.846667	1.78333	1.07471	2.08e-09	3.92e-09	yes	up
ENSSSCG00000001805	WHAMM	320	1051.33	4.19667	12.76	1.60431	1.46e-77	8.52e-77	yes	up
ENSSSCG00000001807	AP3B2	7.66667	1174.67	0.0533333	7.08333	7.05325	0	0	yes	up
ENSSSCG00000001808	CPEB1	144.667	529.667	2.02	7.54667	1.90148	3.64e-71	1.96e-70	yes	up
ENSSSCG00000001814	IQGAP1	19079.7	6509	110.77	39.1633	-1.49999	1.38e-106	1.12e-105	yes	down
ENSSSCG00000001816	BLM	75	23	0.633333	0.176667	-1.84194	2.22e-16	5.06e-16	yes	down
ENSSSCG00000001818	FES	627	1760.67	7.36667	19.1433	1.37776	3.55e-74	1.98e-73	yes	up
ENSSSCG00000001819	MAN2A2	8721.67	2727.67	56.33	16.9233	-1.73489	3.08e-193	5.91e-192	yes	down
ENSSSCG00000001824	ZXDC	606.617	4045.58	7.79333	52.4567	2.75081	0	0	yes	up
ENSSSCG00000001826	-	44	12	0.766667	0.2	-1.9386	4.7e-13	9.81e-13	yes	down
ENSSSCG00000001832	ACAN	0.333333	3.33333	0.00333333	0.0133333	2	0.016189	0.0222167	yes	up
ENSSSCG00000001838	POLG	1778.84	5328.39	16.31	45.5667	1.48222	8.17e-132	8.67e-131	yes	up
ENSSSCG00000001840	KIF7	1268.8	4163.88	6.32667	19.4133	1.61753	3.01e-139	3.45e-138	yes	up
ENSSSCG00000001847	MESP1	50.3333	296	0.813333	4.38333	2.43011	7.08e-54	3.03e-53	yes	up
ENSSSCG00000001849	ANPEP	5151.67	2359	56.79	24.3933	-1.21915	2.23e-76	1.28e-75	yes	down
ENSSSCG00000001859	-	74.3333	194.333	2.63	6.40667	1.28451	1.47e-19	3.57e-19	yes	up
ENSSSCG00000001863	TMEM266	19.3333	9	0.403333	0.166667	-1.27501	0.00100673	0.00150168	yes	down
ENSSSCG00000001865	SCAPER	655	122.333	4.92333	0.796667	-2.62759	7.65e-86	4.94e-85	yes	down
ENSSSCG00000001866	RCN2	2231.33	409.667	42.5467	7.25667	-2.55167	1.47e-280	5.82e-279	yes	down
ENSSSCG00000001867	PSTPIP1	4.33333	29.6667	0.0533333	0.33	2.62936	1.67e-08	3.06e-08	yes	up
ENSSSCG00000001872	LINGO1	17	408.667	0.263333	5.74667	4.44776	4.27e-151	5.42e-150	yes	up
ENSSSCG00000001875	SNX33	1777.67	5868	15.21	48.44	1.67118	1.3e-178	2.12e-177	yes	up
ENSSSCG00000001881	MAN2C1	663.647	2253.63	8.15667	25.5967	1.6499	3.37e-122	3.26e-121	yes	up
ENSSSCG00000001885	C15orf39	487.667	1722	3.69667	12.0967	1.71031	5.36e-109	4.45e-108	yes	up
ENSSSCG00000001888	RPP25	77.6667	1104	2.07	27.3067	3.72155	5.72e-275	2.16e-273	yes	up
ENSSSCG00000001898	ULK3	359	1762	5.76667	27.1933	2.23744	3.12e-206	6.71e-205	yes	up
ENSSSCG00000001899	LMAN1L	0	3.66667	0.001	0.0833333	6.38082	0.00165575	0.00243803	yes	up
ENSSSCG00000001900	CSK	925	2839.33	14.3633	42.7267	1.57275	4.72e-92	3.29e-91	yes	up
ENSSSCG00000001903	EDC3	887.65	4475.97	11.5	50.21	2.12634	3.12e-246	9.38e-245	yes	up
ENSSSCG00000001904	CLK3	893.017	3326.7	14.6733	59.2867	2.01451	1.64e-130	1.73e-129	yes	up
ENSSSCG00000001906	CYP1A1	62.3333	14525	0.726667	155.25	7.73908	0	0	yes	up
ENSSSCG00000001907	-	682.667	1671.67	20.3333	45.9733	1.17695	1.13e-45	4.32e-45	yes	up
ENSSSCG00000001908	-	48.6667	108.333	0.866667	1.80333	1.05712	1.61e-08	2.96e-08	yes	up
ENSSSCG00000001909	STRA6	216.667	498	3.04667	6.51667	1.0969	4.89e-16	1.1e-15	yes	up
ENSSSCG00000001910	ISLR	409.333	1035	7.19333	16.8933	1.23172	1.14e-40	4.03e-40	yes	up
ENSSSCG00000001912	PML	1243.33	2449.33	14.77	32.96	1.15805	5.22e-39	1.81e-38	yes	up
ENSSSCG00000001913	STOML1	305.667	1189.33	5.96	21.4767	1.84939	2.06e-98	1.53e-97	yes	up
ENSSSCG00000001914	LOXL1	372.667	60.3333	6.26333	0.943333	-2.73109	1.43e-79	8.54e-79	yes	down
ENSSSCG00000001916	-	16	68.6667	0.436667	1.76667	2.01643	3.49e-14	7.51e-14	yes	up
ENSSSCG00000001917	CD276	5435.97	11933.3	71.7433	168.78	1.23423	2.49e-75	1.41e-74	yes	up
ENSSSCG00000001918	NPTN	7361.83	2678.19	131.49	44.2133	-1.5724	8.09e-124	8e-123	yes	down
ENSSSCG00000001920	HCN4	8.33333	151	0.0966667	1.58667	4.03684	5.59e-69	2.94e-68	yes	up
ENSSSCG00000001928	-	0	8.66667	0.001	0.236667	7.88671	2.12e-07	3.74e-07	yes	up
ENSSSCG00000001929	PARP6	242.643	967.853	3.74	13.6133	1.86391	1.98e-64	9.72e-64	yes	up
ENSSSCG00000001931	-	131.667	465.667	1.82333	6.02667	1.72478	3.62e-43	1.33e-42	yes	up
ENSSSCG00000001934	-	3582.67	815.667	31.2167	6.7	-2.22008	1.86e-126	1.87e-125	yes	down
ENSSSCG00000001938	SSTR1	1	24	0.0333333	0.786667	4.56071	1.23e-12	2.54e-12	yes	up
ENSSSCG00000001947	BRMS1L	383.333	142.333	5.79667	2.01	-1.52803	1.14e-28	3.33e-28	yes	down
ENSSSCG00000001955	SRP54	1545.77	605.863	21.11	7.72667	-1.45001	5.78e-83	3.6e-82	yes	down
ENSSSCG00000001958	BAZ1A	1180	628	10.2167	5.10667	-1.00047	7.68e-31	2.32e-30	yes	down
ENSSSCG00000001959	CFL2	5781.33	1725.67	59.0167	15.6533	-1.91465	2.56e-153	3.32e-152	yes	down
ENSSSCG00000001963	EGLN3	6356	1211.67	78.49	14.04	-2.48297	1.53e-307	7.63e-306	yes	down
ENSSSCG00000001966	ARHGAP5	1490	695.333	7.52667	3.42333	-1.13661	2.37e-43	8.75e-43	yes	down
ENSSSCG00000001970	-	1316.67	374.667	8.68	2.33	-1.89737	1.1e-75	6.27e-75	yes	down
ENSSSCG00000001973	SCFD1	927	218.333	16.6167	3.43333	-2.27495	1.56e-114	1.37e-113	yes	down
ENSSSCG00000001974	G2E3	186.333	61.6667	1.21667	0.376667	-1.69157	8.57e-32	2.64e-31	yes	down
ENSSSCG00000001977	STXBP6	178.263	49.2833	3.97	1.32	-1.5886	3.87e-35	1.26e-34	yes	down
ENSSSCG00000001984	-	1570.83	6412.97	11.71	43.6233	1.89736	3e-184	5.22e-183	yes	up
ENSSSCG00000001985	CBLN3	9.33333	28	0.153333	0.426667	1.47644	0.000235877	0.000364381	yes	up
ENSSSCG00000001988	ADCY4	1.66667	10.67	0.0166667	0.0966667	2.53605	7.63e-05	0.00012092	yes	up
ENSSSCG00000001989	CIDEB	0	2.33333	0.001	0.08	6.32193	0.0226308	0.0306133	yes	up
ENSSSCG00000001990	NOP9	384.713	2551.21	6.57667	42.33	2.68625	1.28e-257	4.21e-256	yes	up
ENSSSCG00000001993	TGM1	26.5867	348.203	0.156667	1.94333	3.63276	2.39e-118	2.21e-117	yes	up
ENSSSCG00000001994	TINF2	725.813	1581.64	5.92667	13.45	1.18231	4.4e-50	1.8e-49	yes	up
ENSSSCG00000001999	-	17.56	148.55	0.106667	0.81	2.92481	1.1e-07	1.96e-07	yes	up
ENSSSCG00000002001	REC8	357.923	816.597	2.86667	6.03667	1.07438	5.75e-26	1.59e-25	yes	up
ENSSSCG00000002002	IRF9	1206.74	2766.74	29.0267	61.64	1.08649	2.44e-66	1.23e-65	yes	up
ENSSSCG00000002003	-	608.42	1816.44	6.06	17.33	1.51588	1.66e-94	1.19e-93	yes	up
ENSSSCG00000002007	FITM1	4.40333	13.8333	0.0733333	0.233333	1.66985	0.00604934	0.00857951	yes	up
ENSSSCG00000002009	PCK2	2640.33	586.667	47.9733	10.2633	-2.22473	2.02e-243	5.97e-242	yes	down
ENSSSCG00000002014	JPH4	12.5833	562.02	0.13	5.20667	5.32378	1.18e-227	3e-226	yes	up
ENSSSCG00000002015	AP1G2	309.4	927.827	4.78333	13.3433	1.48003	4.84e-46	1.86e-45	yes	up
ENSSSCG00000002016	THTPA	198.02	515.153	1.52	3.70667	1.28605	4.82e-36	1.59e-35	yes	up
ENSSSCG00000002020	-	253.667	1107	9.62	37.36	1.95739	4.49e-74	2.5e-73	yes	up
ENSSSCG00000002025	SLC22A17	1244	572	21.0067	8.98	-1.22606	1.67e-34	5.38e-34	yes	down
ENSSSCG00000002026	EFS	3.33333	52.6667	0.0566667	0.736667	3.70044	6.08e-24	1.62e-23	yes	up
ENSSSCG00000002029	MYH7	5.33333	22.6667	0.0333333	0.136667	2.03562	1.05e-06	1.8e-06	yes	up
ENSSSCG00000002034	ACIN1	2498.47	5659.05	22.3467	46.5433	1.05851	8.07e-80	4.85e-79	yes	up
ENSSSCG00000002035	C14orf119	1175.2	622.283	21.67	10.6633	-1.02304	1.54e-45	5.87e-45	yes	down
ENSSSCG00000002041	SLC7A7	89.5133	39.9633	1.37333	0.593333	-1.21077	8.51e-11	1.67e-10	yes	down
ENSSSCG00000002050	DAD1	2331.33	976.333	76.99	29.68	-1.37518	2.35e-63	1.14e-62	yes	down
ENSSSCG00000002129	RPGRIP1	5.66667	1.66667	0.0633333	0.0166667	-1.926	0.0318092	0.0424565	yes	down
ENSSSCG00000002134	RNASE10	0.333333	23.6667	0.02	1.12333	5.81164	2.02e-15	4.5e-15	yes	up
ENSSSCG00000002135	PNP	240.477	4691.02	6.61333	119.323	4.17335	0	0	yes	up
ENSSSCG00000002138	OSGEP	114.403	332.47	3.44	9.45	1.45791	2.04e-30	6.12e-30	yes	up
ENSSSCG00000002140	-	0.333333	18.3333	0.00333333	0.143333	5.42626	2.18e-13	4.58e-13	yes	up
ENSSSCG00000002143	PARP2	446.667	92.3333	3.41	0.666667	-2.35473	3.15e-76	1.8e-75	yes	down
ENSSSCG00000002245	KATNBL1	441	115.667	4.19	1.04	-2.01037	9.44e-59	4.32e-58	yes	down
ENSSSCG00000002258	KLHL25	37.6667	160.333	0.903333	3.59333	1.99199	2.05e-25	5.62e-25	yes	up
ENSSSCG00000002260	-	28.3333	61	1.63	3.27	1.00442	0.000136801	0.000213843	yes	up
ENSSSCG00000002262	SV2B	16.6667	6	0.106667	0.0366667	-1.54057	0.00051075	0.000775573	yes	down
ENSSSCG00000002265	FAM174B	110.333	57.3333	8.34667	4.01333	-1.0564	1.54e-10	3e-10	yes	down
ENSSSCG00000002267	RGMA	76.6667	274.667	1.35333	5.26	1.95855	1.51e-43	5.58e-43	yes	up
ENSSSCG00000002268	AKAP5	89.3333	9	0.82	0.0766667	-3.41895	1.67e-34	5.36e-34	yes	down
ENSSSCG00000002275	PPP1R36	375.333	150.667	8.13	3.02	-1.42871	2.5e-40	8.83e-40	yes	down
ENSSSCG00000002276	PLEKHG3	1173.33	2455.33	9.89667	20.1467	1.02553	1.51e-53	6.42e-53	yes	up
ENSSSCG00000002280	RAB15	30.6667	78.3333	0.536667	1.21667	1.18084	4.46e-08	8.04e-08	yes	up
ENSSSCG00000002283	FUT8	1297.33	403.333	20.8033	6.24667	-1.73566	8.34e-96	6.01e-95	yes	down
ENSSSCG00000002290	PLEK2	193.373	405.133	2.88	6.52667	1.18028	1.63e-19	3.96e-19	yes	up
ENSSSCG00000002292	PLEKHH1	20	79.3333	0.193333	0.733333	1.92338	9.35e-15	2.04e-14	yes	up
ENSSSCG00000002294	ARG2	264.867	855.413	7.53	22.92	1.60589	9.05e-68	4.68e-67	yes	up
ENSSSCG00000002296	RDH11	3395.33	828.333	46.6967	10.6567	-2.13156	1.61e-184	2.82e-183	yes	down
ENSSSCG00000002310	-	0	6	0.001	0.11	6.78136	3.13e-05	5.06e-05	yes	up
ENSSSCG00000002314	SMOC1	206	33.6667	4.41	0.686667	-2.6831	2.13e-52	8.95e-52	yes	down
ENSSSCG00000002315	SLC8A3	5.66667	67	0.0533333	0.56	3.39232	3.14e-27	8.92e-27	yes	up
ENSSSCG00000002329	MAP3K9	11.3333	353.333	0.0933333	2.78	4.89655	3.47e-114	3.04e-113	yes	up
ENSSSCG00000002333	DPF3	164	96.3333	4.97667	2.32667	-1.09692	2.96e-06	4.98e-06	yes	down
ENSSSCG00000002337	ZFYVE1	995.333	4477.67	10.1133	45.5333	2.17066	1.51e-233	4.08e-232	yes	up
ENSSSCG00000002341	PAPLN	15.7733	79.19	0.0933333	0.426667	2.19265	9.9e-22	2.54e-21	yes	up
ENSSSCG00000002344	RIOX1	536	1615.33	6.29667	17.53	1.47717	3.28e-84	2.07e-83	yes	up
ENSSSCG00000002348	-	601.553	283.533	16.4467	7.19667	-1.19239	5.15e-29	1.51e-28	yes	down
ENSSSCG00000002349	ACOT4	2561.11	1007.8	39.2267	15.9333	-1.29979	4.03e-105	3.22e-104	yes	down
ENSSSCG00000002350	ELMSAN1	427.667	1271.67	5.20667	14.5233	1.47994	1.12e-54	4.86e-54	yes	up
ENSSSCG00000002351	-	231.333	104.333	5.88667	2.44667	-1.26663	9.97e-25	2.7e-24	yes	down
ENSSSCG00000002352	ZNF410	714.227	1569.75	10.7167	23.71	1.14564	1.56e-39	5.44e-39	yes	up
ENSSSCG00000002353	FAM161B	71.1067	222.253	0.996667	2.88333	1.53255	6.79e-23	1.77e-22	yes	up
ENSSSCG00000002355	ENTPD5	225.397	57.3333	1.89667	0.47	-2.01273	9.45e-42	3.4e-41	yes	down
ENSSSCG00000002357	ALDH6A1	307.667	72.3333	2.66333	0.59	-2.17445	4.76e-60	2.21e-59	yes	down
ENSSSCG00000002368	LTBP2	52947.4	6655.67	282.357	33.3967	-3.07974	0	0	yes	down
ENSSSCG00000002374	DLST	3525	9265.89	37.3733	91.53	1.29224	1.96e-122	1.9e-121	yes	up
ENSSSCG00000002377	EIF2B2	975	2303.33	25.42	55.9333	1.13774	2.17e-75	1.23e-74	yes	up
ENSSSCG00000002385	TGFB3	2408.67	112.667	27.1567	1.18333	-4.52038	0	0	yes	down
ENSSSCG00000002386	IFT43	275.667	107	11.45	4.11667	-1.4758	7.82e-29	2.28e-28	yes	down
ENSSSCG00000002388	ESRRB	0.333333	3.66667	0.00333333	0.03	3.16993	0.0195211	0.0265828	yes	up
ENSSSCG00000002389	VASH1	239.667	627	1.51667	4.23333	1.48089	1.18e-37	3.99e-37	yes	up
ENSSSCG00000002390	ANGEL1	158.667	546.333	2.88667	9.25	1.68005	2.06e-56	9.12e-56	yes	up
ENSSSCG00000002392	IRF2BPL	2147.67	4608.33	37.44	75.4167	1.0103	1.9e-48	7.57e-48	yes	up
ENSSSCG00000002397	POMT2	218.057	620.643	1.31667	3.47	1.39805	7.88e-46	3.02e-45	yes	up
ENSSSCG00000002398	TMEM63C	59.3333	527	0.42	3.44333	3.03534	1.46e-122	1.42e-121	yes	up
ENSSSCG00000002400	SAMD15	4.66667	0.333333	0.1	0.00666667	-3.90689	0.00470571	0.00673077	yes	down
ENSSSCG00000002408	ADCK1	51.3333	151.667	0.743333	2.13667	1.52328	1.21e-15	2.72e-15	yes	up
ENSSSCG00000002412	STON2	5	42.3333	0.0533333	0.4	2.90689	1.29e-18	3.07e-18	yes	up
ENSSSCG00000002414	SEL1L	6920.67	1819.67	40.0767	9.35	-2.09972	1.18e-141	1.38e-140	yes	down
ENSSSCG00000002425	PTPN21	1796.67	896.333	20.4967	9.65	-1.08679	5.54e-30	1.65e-29	yes	down
ENSSSCG00000002430	EFCAB11	56.6667	13.6667	3.23333	0.7	-2.2076	3.98e-18	9.37e-18	yes	down
ENSSSCG00000002432	KCNK13	0	35.3333	0.001	0.666667	9.38082	7.29e-25	1.98e-24	yes	up
ENSSSCG00000002440	-	256.333	1026	2.07	6.80333	1.71661	1.02e-71	5.5e-71	yes	up
ENSSSCG00000002443	TC2N	2	9	0.02	0.0833333	2.05889	0.000964608	0.00143999	yes	up
ENSSSCG00000002444	FBLN5	1579	7182.67	24.3833	103.317	2.08311	1.03e-222	2.53e-221	yes	up
ENSSSCG00000002445	TRIP11	781.333	182.667	4.35	0.88	-2.30544	9.27e-118	8.52e-117	yes	down
ENSSSCG00000002446	-	1639.67	561.667	11.9367	3.79667	-1.65259	4.27e-73	2.35e-72	yes	down
ENSSSCG00000002447	CPSF2	1327.33	505.667	12.6867	4.51333	-1.49105	1.77e-78	1.04e-77	yes	down
ENSSSCG00000002449	-	721	365	84.1167	39.6867	-1.08374	3.67e-31	1.12e-30	yes	down
ENSSSCG00000002451	RIN3	290.667	1097.33	3.71333	12.9933	1.80698	7.13e-109	5.92e-108	yes	up
ENSSSCG00000002452	LGMN	33611.3	11675.7	690.983	224.55	-1.62161	7.08e-185	1.24e-183	yes	down
ENSSSCG00000002455	GOLGA5	1828.33	603.667	27.9967	8.5	-1.71972	7.05e-130	7.36e-129	yes	down
ENSSSCG00000002456	CHGA	123.333	758	1.73667	9.95333	2.51886	2.4e-111	2.04e-110	yes	up
ENSSSCG00000002457	ITPK1	482.333	1130	6.42333	14.1367	1.13805	7.43e-50	3.03e-49	yes	up
ENSSSCG00000002460	UBR7	1038.33	499.333	11.39	5.12	-1.15355	6.91e-45	2.61e-44	yes	down
ENSSSCG00000002464	PRIMA1	7.33333	29	0.0733333	0.263333	1.84435	4.05e-07	7.05e-07	yes	up
ENSSSCG00000002467	ASB2	330.333	77.6667	3.43667	0.846667	-2.02114	3.99e-68	2.07e-67	yes	down
ENSSSCG00000002474	PPP4R4	18.6667	6.33333	0.26	0.0866667	-1.58496	2e-05	3.25e-05	yes	down
ENSSSCG00000002490	GSC	0.666667	97	0.0266667	3.22	6.91588	2.88e-64	1.41e-63	yes	up
ENSSSCG00000002495	SYNE3	263	911.333	1.28333	4.38	1.77103	1.54e-69	8.15e-69	yes	up
ENSSSCG00000002505	-	3631.33	954	37.6067	9.71333	-1.95295	5.07e-173	7.88e-172	yes	down
ENSSSCG00000002506	VRK1	196.667	62	4.84667	1.41333	-1.77789	1.08e-33	3.43e-33	yes	down
ENSSSCG00000002507	BCL11B	0.666667	14.3333	0.01	0.2	4.32193	4.53e-09	8.46e-09	yes	up
ENSSSCG00000002512	DEGS2	1.98667	69.6467	0.0233333	0.773333	5.05063	6.72e-35	2.17e-34	yes	up
ENSSSCG00000002517	-	231.667	1071	4.83333	20.7133	2.09947	4.62e-116	4.17e-115	yes	up
ENSSSCG00000002520	SLC25A29	467	1819.33	6.17	18.3067	1.56903	2.5e-140	2.89e-139	yes	up
ENSSSCG00000002524	AMN	0	2.66667	0.001	0.0633333	5.98489	0.018934	0.0258206	yes	up
ENSSSCG00000002528	-	374.667	1251.33	3.76	11.53	1.61659	4.03e-57	1.8e-56	yes	up
ENSSSCG00000002529	-	546.09	221.407	64.92	24.3833	-1.41277	3.35e-39	1.16e-38	yes	down
ENSSSCG00000002531	MOK	35.4667	11	0.85	0.2	-2.08746	1.15e-07	2.04e-07	yes	down
ENSSSCG00000002532	-	227	711.333	3.62	10.49	1.53495	1.25e-62	6e-62	yes	up
ENSSSCG00000002533	WDR20	260.2	768.333	3.75667	11.01	1.55129	6e-66	3.02e-65	yes	up
ENSSSCG00000002544	PPP1R13B	289.77	1540.25	2.73	13.4433	2.29992	1.13e-191	2.13e-190	yes	up
ENSSSCG00000002546	XRCC3	96.6667	346.333	1.57667	5.25667	1.73727	1.86e-39	6.45e-39	yes	up
ENSSSCG00000002547	-	3190.33	7600.33	66.2833	136.377	1.04088	1.4e-85	9.03e-85	yes	up
ENSSSCG00000002555	JAG2	20.6667	832.667	0.183333	7.21667	5.29879	2.15e-237	5.98e-236	yes	up
ENSSSCG00000002557	NUDT14	9	156.333	0.323333	5.3	4.0349	1.1e-69	5.81e-69	yes	up
ENSSSCG00000002558	-	698.333	5771.33	6.06667	46.7	2.94445	0	0	yes	up
ENSSSCG00000002573	-	0	2.66667	0.001	0.0266667	4.73697	0.0139379	0.019227	yes	up
ENSSSCG00000002623	GSTA1	2	8	0.03	0.1	1.73697	0.00461077	0.00659888	yes	up
ENSSSCG00000002635	SPIRE2	345.103	1519.08	2.58333	10.6033	2.03721	2.01e-146	2.45e-145	yes	up
ENSSSCG00000002637	-	11.3333	30.3333	0.946667	2.43333	1.36201	3.27e-05	5.28e-05	yes	up
ENSSSCG00000002639	TUBB3	18.4067	4567.04	0.31	71.3	7.84549	0	0	yes	up
ENSSSCG00000002640	DEF8	1143.33	2877	9.52667	24.4933	1.36235	4.56e-85	2.91e-84	yes	up
ENSSSCG00000002642	CDH15	1.33333	7.33333	0.01	0.0466667	2.22239	0.00288483	0.00418349	yes	up
ENSSSCG00000002646	TRAPPC2L	911	2313.67	18.2633	42.2567	1.21023	7.3e-81	4.44e-80	yes	up
ENSSSCG00000002648	CBFA2T3	6.33333	28.6667	0.136667	0.583333	2.09366	6.61e-07	1.14e-06	yes	up
ENSSSCG00000002650	APRT	487.667	1384	23.0767	60.52	1.39098	3.64e-56	1.61e-55	yes	up
ENSSSCG00000002651	CDT1	100.667	696	1.98667	12.6533	2.6711	1.98e-104	1.57e-103	yes	up
ENSSSCG00000002652	-	592.667	5459.33	4.14	35.14	3.08541	0	0	yes	up
ENSSSCG00000002653	JPH3	0.333333	32	0.00666667	0.556667	6.3837	8.16e-21	2.05e-20	yes	up
ENSSSCG00000002654	-	939	2048	9.18333	24.1133	1.39274	1.9e-52	8.02e-52	yes	up
ENSSSCG00000002656	ZCCHC14	1073.75	2925.91	6.59333	20.47	1.63443	1.48e-80	8.98e-80	yes	up
ENSSSCG00000002658	FOXL1	22	65.6667	0.88	2.44333	1.47328	2e-11	4e-11	yes	up
ENSSSCG00000002660	MTHFSD	232.667	582.667	3.25667	6.75667	1.05292	2.29e-34	7.33e-34	yes	up
ENSSSCG00000002664	-	923.193	2600.04	7.96333	20.6	1.3712	1.12e-99	8.43e-99	yes	up
ENSSSCG00000002670	USP10	1224	3418.67	14.8367	38.5133	1.37619	6.82e-117	6.2e-116	yes	up
ENSSSCG00000002672	TLDC1	152.333	336	2.18333	4.60333	1.07615	7.56e-17	1.74e-16	yes	up
ENSSSCG00000002675	DNAAF1	9	51.3333	0.16	0.853333	2.41504	4.98e-12	1.01e-11	yes	up
ENSSSCG00000002680	TAF1C	269.667	1513.67	3.42667	17.71	2.36969	4.71e-163	6.67e-162	yes	up
ENSSSCG00000002688	PLCG2	88.3333	534.667	0.433333	2.46	2.50511	1.21e-89	8.19e-89	yes	up
ENSSSCG00000002690	GAN	275.333	730.667	2.31333	5.79333	1.32442	5.08e-31	1.54e-30	yes	up
ENSSSCG00000002696	VAT1L	548.35	157	5.49	1.46	-1.91084	1.33e-80	8.04e-80	yes	down
ENSSSCG00000002697	NUDT7	753	255.667	28.22	8.91	-1.66322	1.74e-64	8.58e-64	yes	down
ENSSSCG00000002706	ADAT1	43.6667	332.667	0.983333	6.90333	2.81154	7.01e-62	3.33e-61	yes	up
ENSSSCG00000002712	LDHD	381.333	51.6667	7.73667	0.956667	-3.01562	9.8e-113	8.44e-112	yes	down
ENSSSCG00000002714	WDR59	317	714.333	3.80333	7.90333	1.0552	9.99e-32	3.07e-31	yes	up
ENSSSCG00000002715	RFWD3	335.667	1029	2.83	8.07333	1.51236	9e-65	4.45e-64	yes	up
ENSSSCG00000002716	MLKL	196.333	93	4.19	1.82333	-1.20037	6.54e-11	1.29e-10	yes	down
ENSSSCG00000002719	EXOSC6	42.3333	404.667	2.17667	18.7667	3.10798	4.8e-82	2.96e-81	yes	up
ENSSSCG00000002720	-	10.3333	2.33333	0.29	0.0633333	-2.19502	0.000224678	0.000347745	yes	down
ENSSSCG00000002722	DDX19B	1318.67	3073.33	29.4933	63.7	1.1109	9.2e-61	4.32e-60	yes	up
ENSSSCG00000002737	CHST4	0.666667	3.66667	0.01	0.05	2.32193	0.0305452	0.0408595	yes	up
ENSSSCG00000002739	PHLPP2	103.333	455.667	1.08667	4.24	1.96415	1.64e-65	8.21e-65	yes	up
ENSSSCG00000002748	-	622.333	2281.67	4.72	16.09	1.76931	2.61e-143	3.12e-142	yes	up
ENSSSCG00000002749	-	32.3567	226.897	0.416667	2.46333	2.56365	6.61e-54	2.83e-53	yes	up
ENSSSCG00000002753	NOB1	789.333	6858.67	8.83667	70.79	3.00197	9.88131291682493e-323	5.5088319511299e-321	yes	up
ENSSSCG00000002754	NQO1	163	732.333	3.42333	14.5067	2.08324	2.7e-77	1.57e-76	yes	up
ENSSSCG00000002759	-	813.37	2382.1	7.59333	20.63	1.44194	3.78e-113	3.27e-112	yes	up
ENSSSCG00000002763	PRMT7	1717.39	5442.95	23.9567	67.7967	1.50079	5.2e-152	6.69e-151	yes	up
ENSSSCG00000002764	SMPD3	9.33333	67.6867	0.06	0.36	2.58496	4.07e-21	1.03e-20	yes	up
ENSSSCG00000002767	TSNAXIP1	4	9.48333	0.0666667	0.146667	1.1375	0.0238643	0.0322252	yes	up
ENSSSCG00000002769	THAP11	1027.67	3711	22.5667	75.2533	1.73756	1.92e-114	1.68e-113	yes	up
ENSSSCG00000002774	RIPOR1	2471.33	12840.7	22.8133	111.577	2.29009	2.37151510003798e-321	1.30942218117306e-319	yes	up
ENSSSCG00000002778	ZDHHC1	133.773	436.847	2.32667	7.07667	1.60481	6.01e-54	2.58e-53	yes	up
ENSSSCG00000002782	PLEKHG4	4.66667	46	0.05	0.483333	3.27302	1.96e-20	4.9e-20	yes	up
ENSSSCG00000002783	SLC9A5	10	156.333	0.15	2.18	3.86129	7.98e-66	4.02e-65	yes	up
ENSSSCG00000002787	E2F4	777.667	3528.67	13.0133	55.7967	2.10019	1.06e-167	1.58e-166	yes	up
ENSSSCG00000002788	EXOC3L1	0.666667	49.6333	0.01	0.703333	6.13614	1.43e-33	4.54e-33	yes	up
ENSSSCG00000002790	-	744	1801.67	37.68	86.0933	1.1921	6.91e-58	3.12e-57	yes	up
ENSSSCG00000002792	HSF4	322.333	929.667	9.24667	24.47	1.40401	2.25e-39	7.8e-39	yes	up
ENSSSCG00000002793	-	64	157	2.4	5.52333	1.2025	1.4e-15	3.12e-15	yes	up
ENSSSCG00000002795	CDH11	4628.44	1428.69	35.46	10.3233	-1.78028	2.01e-94	1.43e-93	yes	down
ENSSSCG00000002802	GINS3	73.6667	530.667	0.89	6.16	2.79105	1.78e-123	1.75e-122	yes	up
ENSSSCG00000002808	ZNF319	200	2806.67	1.98667	25.9333	3.70639	7.31e-293	3.22e-291	yes	up
ENSSSCG00000002812	KIFC3	3524.8	16261.2	45.58	196.223	2.10602	1.9e-271	7.01e-270	yes	up
ENSSSCG00000002818	PLLP	8.81667	44.9067	0.07	0.81	3.5325	5.39e-10	1.03e-09	yes	up
ENSSSCG00000002828	LPCAT2	14.6667	58.6667	0.13	0.473333	1.86434	6e-15	1.32e-14	yes	up
ENSSSCG00000002831	IRX3	352	1190.98	3.06333	9.69333	1.66189	2.43e-86	1.57e-85	yes	up
ENSSSCG00000002835	TOX3	2.66667	82.6667	0.05	1.61667	5.01495	6.3e-43	2.31e-42	yes	up
ENSSSCG00000002836	SALL1	87.3333	388	0.523333	2.20667	2.07607	4.8e-54	2.06e-53	yes	up
ENSSSCG00000002838	ZNF423	4	169.333	0.0366667	1.29667	5.14419	2.61e-87	1.71e-86	yes	up
ENSSSCG00000002849	-	243.333	26.6667	3.06667	0.34	-3.17306	8.54e-94	6.05e-93	yes	down
ENSSSCG00000002852	PLEKHF1	1418.33	3615	30.62	72.41	1.24171	2.25e-81	1.38e-80	yes	up
ENSSSCG00000002854	POP4	356.667	1509.33	4.20667	17.1567	2.02802	6.66e-160	9.18e-159	yes	up
ENSSSCG00000002857	-	8	54	0.106667	0.673333	2.65821	6.88e-20	1.69e-19	yes	up
ENSSSCG00000002860	-	916.333	433.667	53.6033	23.5033	-1.18946	1.93e-52	8.11e-52	yes	down
ENSSSCG00000002864	SLC7A10	3.1	52.9833	0.0266667	0.46	4.10852	7.66e-26	2.12e-25	yes	up
ENSSSCG00000002866	CEBPA	10.6667	405.333	0.416667	14.2933	5.1003	5.15e-132	5.48e-131	yes	up
ENSSSCG00000002868	PEPD	1848	6227	41.65	130.177	1.64408	1.92e-162	2.7e-161	yes	up
ENSSSCG00000002875	-	95	568.333	3.30333	18.3467	2.47352	4.96e-113	4.29e-112	yes	up
ENSSSCG00000002884	LSR	85.6667	254.667	1.91667	5.42	1.49969	6e-25	1.63e-24	yes	up
ENSSSCG00000002895	-	306.74	2685.17	2.18333	17.74	3.0224	3.41e-298	1.58e-296	yes	up
ENSSSCG00000002900	-	66.3333	144	1.13333	2.29667	1.01897	1.73e-11	3.46e-11	yes	up
ENSSSCG00000002901	UPK1A	2.33333	9.33333	0.126667	0.44	1.79647	0.0126398	0.0174989	yes	up
ENSSSCG00000002902	ATP4A	13.3333	64.6667	0.16	0.77	2.26679	1.73e-11	3.45e-11	yes	up
ENSSSCG00000002905	RBM42	2139.33	6002.33	51.66	134.95	1.38531	1.26e-87	8.32e-87	yes	up
ENSSSCG00000002906	ETV2	15.3333	39.3333	0.653333	1.51667	1.21501	1.34e-05	2.2e-05	yes	up
ENSSSCG00000002918	HCST	2.66667	7	0.226667	0.593333	1.38827	0.0361437	0.0480264	yes	up
ENSSSCG00000002921	-	1210.33	3012.33	13.6833	29.97	1.1311	2.02e-79	1.21e-78	yes	up
ENSSSCG00000002923	WDR62	219.333	757.667	1.71	5.45667	1.67402	6.7e-69	3.52e-68	yes	up
ENSSSCG00000002930	ZNF260	212	84.3333	1.96333	0.776667	-1.33794	2.69e-25	7.37e-25	yes	down
ENSSSCG00000002931	ZNF565	58	19.6667	0.886667	0.29	-1.61234	4.29e-13	8.95e-13	yes	down
ENSSSCG00000002933	ZNF382	82.3333	34.3333	1.25	0.566667	-1.14136	6.29e-11	1.24e-10	yes	down
ENSSSCG00000002937	-	49.6667	16.6667	0.45	0.173333	-1.37638	1.37e-11	2.75e-11	yes	down
ENSSSCG00000002950	SIPA1L3	632.333	2520	4.89	18.0767	1.88622	4.77e-146	5.82e-145	yes	up
ENSSSCG00000002954	SPINT2	166	37	4.92333	1.19	-2.04867	2.09e-37	7.06e-37	yes	down
ENSSSCG00000002955	CATSPERG	20.3333	49.6667	0.24	0.55	1.1964	1.23e-06	2.1e-06	yes	up
ENSSSCG00000002959	FAM98C	452.333	1413.33	14.2733	41.63	1.5443	5.94e-88	3.95e-87	yes	up
ENSSSCG00000002960	RASGRP4	4	11	0.0433333	0.126667	1.54749	0.00747628	0.0105372	yes	up
ENSSSCG00000002962	MAP4K1	4	15.3333	0.0733333	0.243333	1.73039	0.000796221	0.00119482	yes	up
ENSSSCG00000002963	EIF3K	3368.33	7721	117.657	264.973	1.17126	1.79e-80	1.08e-79	yes	up
ENSSSCG00000002972	-	85.3333	218.667	2.22	5.33	1.26358	3.02e-19	7.31e-19	yes	up
ENSSSCG00000002978	PSP-II	17	0.333333	0.793333	0.0333333	-4.57289	2.22e-13	4.67e-13	yes	down
ENSSSCG00000002980	-	3.33333	0	0.26	0.001	-8.02237	0.00295377	0.00427761	yes	down
ENSSSCG00000002983	LGALS13	3.33333	29.6667	0.103333	0.843333	3.0288	1.46e-13	3.09e-13	yes	up
ENSSSCG00000002988	-	26.6667	15.6667	0.263333	0.13	-1.01838	0.00547654	0.00779518	yes	down
ENSSSCG00000002991	-	31.4933	92.5067	0.493333	1.34333	1.44518	1.46e-13	3.08e-13	yes	up
ENSSSCG00000002993	CYP2A19	5.33333	163.333	0.103333	3.57667	5.11324	6.85e-86	4.43e-85	yes	up
ENSSSCG00000002995	EGLN2	786.187	1792.99	28.0367	59.9433	1.09628	3.07e-45	1.17e-44	yes	up
ENSSSCG00000002996	-	1158.15	2825.35	25.9233	57.0833	1.13882	1.87e-65	9.35e-65	yes	up
ENSSSCG00000003000	ITPKC	160.307	1061.89	1.6	9.95	2.63662	5.53e-137	6.22e-136	yes	up
ENSSSCG00000003006	CYP2B22	1.33333	19.6667	0.03	0.23	2.9386	1.92e-09	3.63e-09	yes	up
ENSSSCG00000003013	B9D2	120.667	357	4.76333	13.1133	1.46099	1.24e-35	4.06e-35	yes	up
ENSSSCG00000003015	EXOSC5	225.333	1920	6.32	50.38	2.99485	2.43e-296	1.09e-294	yes	up
ENSSSCG00000003016	CCDC97	710	2518	8.40333	28.2833	1.75092	6.9e-152	8.86e-151	yes	up
ENSSSCG00000003017	TGFB1	643.667	3281.33	6.48667	30.58	2.23704	2.42e-223	5.97e-222	yes	up
ENSSSCG00000003018	LIPE	149	489.333	2.19667	6.15333	1.48605	1.75e-34	5.62e-34	yes	up
ENSSSCG00000003022	TMEM145	6.66667	36.6667	0.106667	0.56	2.39232	8.58e-13	1.78e-12	yes	up
ENSSSCG00000003024	-	2.33333	18.3433	0.08	0.566667	2.82443	2.29e-08	4.17e-08	yes	up
ENSSSCG00000003030	CIC	2139.38	7119.57	13.9833	43.16	1.62599	3.11e-160	4.3e-159	yes	up
ENSSSCG00000003035	GSK3A	1101.62	2473.48	28.98	59.88	1.04702	1.53e-49	6.2e-49	yes	up
ENSSSCG00000003037	ZNF574	304	1531	4.67667	21.65	2.21081	4.05e-108	3.34e-107	yes	up
ENSSSCG00000003038	GRIK5	1047	2645.33	14.5367	34.16	1.23261	4.84e-56	2.14e-55	yes	up
ENSSSCG00000003051	-	65.3333	7.33333	1.99667	0.213333	-3.22641	1.39e-25	3.83e-25	yes	down
ENSSSCG00000003063	PHLDB3	177.7	416.87	2.58	6.16	1.25556	1.57e-26	4.4e-26	yes	up
ENSSSCG00000003066	IRGC	0	11.3333	0.001	0.283333	8.14636	2.57e-09	4.83e-09	yes	up
ENSSSCG00000003068	SMG9	154	2195.67	2.79667	36.9167	3.72249	0	0	yes	up
ENSSSCG00000003069	KCNN4	0.666667	13.6667	0.01	0.193333	4.27302	1.55e-08	2.85e-08	yes	up
ENSSSCG00000003071	ZNF404	20	6.66667	0.336667	0.106667	-1.65821	5.12e-05	8.18e-05	yes	down
ENSSSCG00000003076	-	70.9233	28.3333	1.06667	0.403333	-1.40306	1.04e-09	1.99e-09	yes	down
ENSSSCG00000003079	-	1566	4437.67	9.88333	26.1433	1.40337	2.47e-104	1.95e-103	yes	up
ENSSSCG00000003080	-	83.3333	263.667	3.5	10.28	1.55441	4.65e-33	1.46e-32	yes	up
ENSSSCG00000003085	CLPTM1	1030	3290.67	22.1333	66.08	1.57799	1.36e-126	1.38e-125	yes	up
ENSSSCG00000003089	TOMM40	1371	4351.67	32.3967	95.5167	1.55991	1.33e-148	1.66e-147	yes	up
ENSSSCG00000003091	IRF2BP1	739.667	4516	17.1033	97.3667	2.50915	0	0	yes	up
ENSSSCG00000003092	FOXA3	1.33333	24	0.0133333	0.213333	4	1.02e-12	2.11e-12	yes	up
ENSSSCG00000003093	SYMPK	946	3031.67	9.81667	29.2433	1.5748	1.08e-142	1.28e-141	yes	up
ENSSSCG00000003098	PPP5C	1002.33	2444.67	14.8433	33.6867	1.18236	1.29e-76	7.41e-76	yes	up
ENSSSCG00000003101	HIF3A	0	5	0.001	0.0966667	6.59495	0.000322094	0.000493788	yes	up
ENSSSCG00000003102	PNMA8A	4.33333	17	0.136667	0.503333	1.88085	3.83e-05	6.15e-05	yes	up
ENSSSCG00000003103	FKRP	480.667	1808	5.05667	22.14	2.1304	1.92e-136	2.15e-135	yes	up
ENSSSCG00000003108	NPAS1	46.3333	241.667	1.07	5.17667	2.27441	1.4e-43	5.19e-43	yes	up
ENSSSCG00000003110	ZC3H4	279.667	1079	3.21333	11.6933	1.86354	9.13e-75	5.13e-74	yes	up
ENSSSCG00000003112	-	30.6667	90.3333	2.14333	5.81667	1.44034	1.75e-12	3.6e-12	yes	up
ENSSSCG00000003114	DHX34	611.667	3122	5.10333	24.4467	2.26013	2.45e-195	4.79e-194	yes	up
ENSSSCG00000003120	NAPA	1751	4355.33	41.91	96.0933	1.19714	5.1e-64	2.5e-63	yes	up
ENSSSCG00000003128	LIG1	159	571.667	2.47667	8.24667	1.73541	2.09e-43	7.71e-43	yes	up
ENSSSCG00000003129	ZSWIM9	20	81.6667	0.403333	1.63667	2.02072	2.36e-18	5.58e-18	yes	up
ENSSSCG00000003133	GRIN2D	4.66667	59.3333	0.05	0.566667	3.5025	1.5e-23	3.96e-23	yes	up
ENSSSCG00000003134	GRWD1	522.333	6721	4.15667	49.5567	3.57558	0	0	yes	up
ENSSSCG00000003135	KCNJ14	11.3333	409.333	0.173333	5.75	5.05194	3.28e-147	4.04e-146	yes	up
ENSSSCG00000003136	-	1000	5055.67	21.0233	104.427	2.31243	1.28e-209	2.83e-208	yes	up
ENSSSCG00000003138	HSD17B14	431.333	1727.33	22.59	84.0133	1.89493	2.02e-118	1.87e-117	yes	up
ENSSSCG00000003139	BCAT2	1184.67	480	22.88	8.11333	-1.49572	5.13e-68	2.66e-67	yes	down
ENSSSCG00000003143	MAMSTR	12	38.3333	0.34	1.02333	1.58967	1.43e-07	2.52e-07	yes	up
ENSSSCG00000003144	BAX	899.75	3070.57	21.7967	68.3233	1.64827	3.08e-136	3.43e-135	yes	up
ENSSSCG00000003147	CA11	71.2467	22.2633	1.75667	0.193333	-3.18368	3.04e-16	6.89e-16	yes	down
ENSSSCG00000003150	NUCB1	4892.35	2378.35	102.193	46.51	-1.13569	1.46e-70	7.79e-70	yes	down
ENSSSCG00000003152	RUVBL2	927.573	3016.35	21.31	64.26	1.59239	1.99e-127	2.03e-126	yes	up
ENSSSCG00000003153	FTL	25846.5	110997	1137.11	4520.19	1.99101	2.4e-191	4.5e-190	yes	up
ENSSSCG00000003155	PPP1R15A	2428.33	5952	42.88	97.2033	1.1807	6.3e-69	3.31e-68	yes	up
ENSSSCG00000003157	LIN7B	86.3333	280.667	4.39667	12.9233	1.5555	9.49e-36	3.12e-35	yes	up
ENSSSCG00000003158	DHDH	490.903	172.083	17.74	5.86667	-1.59639	8.34e-31	2.52e-30	yes	down
ENSSSCG00000003159	KCNA7	20.3333	84	0.593333	2.25667	1.92728	1.48e-18	3.52e-18	yes	up
ENSSSCG00000003167	FLT3LG	130.667	370.667	4.54667	12.7267	1.48497	5.84e-35	1.89e-34	yes	up
ENSSSCG00000003168	ALDH16A1	478.327	1173.86	6.01667	14.1567	1.23445	2.96e-35	9.64e-35	yes	up
ENSSSCG00000003172	CCDC155	0.666667	4.33333	0.0166667	0.106667	2.67807	0.0110227	0.0153479	yes	up
ENSSSCG00000003189	PRMT1	3230.98	18583.7	65.3533	323.617	2.30795	2.68e-299	1.25e-297	yes	up
ENSSSCG00000003192	IL4I1	10.6667	31.3367	0.216667	0.586667	1.43706	1.84e-05	3e-05	yes	up
ENSSSCG00000003193	TBC1D17	1076.67	3863.67	12.56	41.7133	1.73167	7.04e-127	7.15e-126	yes	up
ENSSSCG00000003194	AKT1S1	1041	2971	24.4967	64.38	1.39403	2.19e-77	1.28e-76	yes	up
ENSSSCG00000003195	PNKP	746.127	2078.73	4.58333	11.75	1.35819	9.74e-63	4.69e-62	yes	up
ENSSSCG00000003201	ATF5	515.667	3129.33	11.87	66.7833	2.49217	1.59e-292	6.98e-291	yes	up
ENSSSCG00000003204	VRK3	247.75	1040.28	4.93667	15.5667	1.65685	3.65e-94	2.6e-93	yes	up
ENSSSCG00000003214	KCNC3	75	763.333	0.486667	4.75667	3.28895	1.2e-146	1.47e-145	yes	up
ENSSSCG00000003217	JOSD2	1216.33	662.333	36.1467	17.08	-1.08155	1.45e-30	4.35e-30	yes	down
ENSSSCG00000003218	MYBPC2	0.666667	4.33333	0.00666667	0.0433333	2.70044	0.0142656	0.0196599	yes	up
ENSSSCG00000003222	SYT3	44	117.667	0.456667	1.13333	1.31136	7.5e-13	1.56e-12	yes	up
ENSSSCG00000003226	-	26	71.4333	0.496667	1.21333	1.28863	1.54e-07	2.72e-07	yes	up
ENSSSCG00000003227	-	145.367	357.153	2.15333	4.95	1.20086	2.81e-27	7.98e-27	yes	up
ENSSSCG00000003228	VSIG10L	4.66667	13	0.0766667	0.186667	1.28379	0.00584617	0.00829761	yes	up
ENSSSCG00000003229	ETFB	1531	4251.67	62.2733	160.123	1.3625	5.13e-87	3.36e-86	yes	up
ENSSSCG00000003235	-	17.72	118.42	0.72	4.44667	2.62666	1.27e-33	4.02e-33	yes	up
ENSSSCG00000003239	HAS1	2.66667	8.66667	0.0533333	0.16	1.58496	0.0107296	0.0149583	yes	up
ENSSSCG00000003256	PRKCG	12.3333	33	0.133333	0.316667	1.24793	1.52e-05	2.49e-05	yes	up
ENSSSCG00000003262	TFPT	467.667	1461	15.31	44.0533	1.52478	3.14e-62	1.5e-61	yes	up
ENSSSCG00000003263	PRPF31	1674.05	3582.37	31.9	67.1633	1.07412	2.77e-56	1.23e-55	yes	up
ENSSSCG00000003264	CNOT3	846.22	2077.27	11.8767	27.7533	1.22453	1.69e-75	9.62e-75	yes	up
ENSSSCG00000003265	-	166.4	481.69	3.62	9.81333	1.43875	8.65e-45	3.26e-44	yes	up
ENSSSCG00000003268	TSEN34	772.333	1715.33	22.3567	45.5733	1.02748	9.28e-36	3.05e-35	yes	up
ENSSSCG00000003269	LENG9	258.333	1264.33	4.57333	20.6833	2.17715	1.5e-119	1.4e-118	yes	up
ENSSSCG00000003282	-	0.666667	5.66667	0.00666667	0.0633333	3.24793	0.0126486	0.0175083	yes	up
ENSSSCG00000003286	-	0.666667	5.66667	0.0133333	0.0866667	2.70044	0.00202456	0.00296153	yes	up
ENSSSCG00000003288	HSPBP1	681.333	1898.33	13.72	37.2767	1.44199	2.89e-74	1.61e-73	yes	up
ENSSSCG00000003289	ISOC2	313.567	1236.4	12.2533	44.5567	1.86247	9.18e-105	7.32e-104	yes	up
ENSSSCG00000003301	PPP6R1	1984.67	4922.33	30.62	70.9033	1.21138	4.4e-81	2.67e-80	yes	up
ENSSSCG00000003302	TMEM86B	0.666667	19	0.0233333	0.6	4.6845	3.89e-12	7.93e-12	yes	up
ENSSSCG00000003306	HELZ2	0	15.6667	0.001	0.0633333	5.98489	2.01e-12	4.14e-12	yes	up
ENSSSCG00000003317	ZNF787	313.667	2531.67	7.34667	53.78	2.87191	4.49e-98	3.31e-97	yes	up
ENSSSCG00000003326	-	116.333	444.667	0.736667	2.60667	1.82312	2.81e-53	1.19e-52	yes	up
ENSSSCG00000003329	ACAP3	467.517	2633.28	2.57333	13.49	2.39018	4.1e-269	1.48e-267	yes	up
ENSSSCG00000003334	UBE2J2	648	2036.33	20.7767	59.7067	1.52293	1.86e-47	7.33e-47	yes	up
ENSSSCG00000003338	PUSL1	58.56	224.807	1.89333	6.67667	1.8182	4.5e-37	1.51e-36	yes	up
ENSSSCG00000003339	INTS11	923.44	2476.53	16.53	39.5433	1.25835	2.86e-98	2.12e-97	yes	up
ENSSSCG00000003342	DVL1	2009.33	4977	32.98	76.1433	1.20713	2.52e-81	1.54e-80	yes	up
ENSSSCG00000003343	-	653.413	6767.01	7.99	76.5667	3.26045	0	0	yes	up
ENSSSCG00000003348	-	1120.67	3450.33	23.4333	66.6867	1.50884	3.49e-101	2.67e-100	yes	up
ENSSSCG00000003354	CCNL2	1418.33	5043	19.7933	65.0033	1.7155	1.1e-155	1.45e-154	yes	up
ENSSSCG00000003359	TPRG1L	1092	2524.39	18.08	38.7633	1.1003	5.99e-66	3.02e-65	yes	up
ENSSSCG00000003362	CEP104	937.667	1730.33	8.06	16.25	1.01159	5.4e-23	1.41e-22	yes	up
ENSSSCG00000003366	CHD5	10.3333	115.837	0.0466667	0.46	3.30117	2.71e-38	9.28e-38	yes	up
ENSSSCG00000003368	RNF207	1.21333	9.89	0.01	0.0733333	2.87447	5.11e-05	8.17e-05	yes	up
ENSSSCG00000003370	HES3	0	5.66667	0.001	0.403333	8.65583	5.71e-05	9.12e-05	yes	up
ENSSSCG00000003371	GPR153	228	714	5.13	15.12	1.55943	1.57e-58	7.16e-58	yes	up
ENSSSCG00000003374	ESPN	1	64.6667	0.02	0.966667	5.59495	5.43e-42	1.96e-41	yes	up
ENSSSCG00000003376	PLEKHG5	647.237	1874.71	6.65	17.7067	1.41287	5.18e-86	3.36e-85	yes	up
ENSSSCG00000003377	ACOT7	419.333	1415.33	9.81667	30.2667	1.62442	2.19e-102	1.7e-101	yes	up
ENSSSCG00000003379	KLHL21	1673.16	10844.3	13.26	79.8733	2.59063	0	0	yes	up
ENSSSCG00000003383	ZBTB48	203.51	1057.04	1.55333	7.18667	2.20996	2.7e-118	2.49e-117	yes	up
ENSSSCG00000003384	DNAJC11	1045.33	5364.67	18.9967	90.1633	2.24679	6.98e-229	1.8e-227	yes	up
ENSSSCG00000003388	SLC45A1	4.33333	12.6667	0.04	0.113333	1.5025	0.00525683	0.00749	yes	up
ENSSSCG00000003393	TMEM201	171.667	1364.67	1.73333	12.6967	2.87283	2.4e-224	5.95e-223	yes	up
ENSSSCG00000003395	PIK3CD	114.497	528.063	0.88	3.86	2.13303	5.27e-82	3.24e-81	yes	up
ENSSSCG00000003399	RBP7	0	2.33333	0.001	0.15	7.22882	0.0224275	0.0303503	yes	up
ENSSSCG00000003402	PGD	1567	7639.33	44.6733	203.467	2.18731	1.36e-236	3.76e-235	yes	up
ENSSSCG00000003403	CENPS	102.667	34.3333	2.67	0.81	-1.72085	3.42e-15	7.56e-15	yes	down
ENSSSCG00000003405	PEX14	644	1896	14.31	38.97	1.44534	4.81e-99	3.59e-98	yes	up
ENSSSCG00000003412	EXOSC10	630.667	1421.33	5.25333	10.92	1.05567	3.67e-37	1.24e-36	yes	up
ENSSSCG00000003420	FBXO6	1386.74	4121.77	33.8967	104.247	1.62079	5.13e-89	3.45e-88	yes	up
ENSSSCG00000003428	MTHFR	457	1847.67	3.11	11.9567	1.94283	3.1e-157	4.15e-156	yes	up
ENSSSCG00000003429	CLCN6	327.667	1332.67	2.28333	8.72	1.93319	1.58e-86	1.03e-85	yes	up
ENSSSCG00000003435	MIIP	333.333	1260	7.60333	26.4767	1.80002	4.05e-76	2.32e-75	yes	up
ENSSSCG00000003437	TNFRSF8	50	545.333	1.20667	12.2933	3.34878	6.3e-163	8.9e-162	yes	up
ENSSSCG00000003458	EFHD2	2680	8647.33	44.45	133.517	1.58676	1.62e-187	2.93e-186	yes	up
ENSSSCG00000003459	CELA2A	0	5	0.001	0.206667	7.69116	0.000143644	0.000224395	yes	up
ENSSSCG00000003468	PLEKHM2	5704.25	22212.3	58.2667	209.163	1.84389	1.94e-238	5.46e-237	yes	up
ENSSSCG00000003470	-	157	359.667	3.08	6.42667	1.06114	3.27e-18	7.71e-18	yes	up
ENSSSCG00000003471	EPHA2	1374.67	8258.33	13.4233	75.0433	2.48298	3.6e-260	1.21e-258	yes	up
ENSSSCG00000003477	NECAP2	2011.33	5026.33	37.1233	86.6933	1.22359	1.84e-93	1.3e-92	yes	up
ENSSSCG00000003478	-	134	530.333	0.926667	3.39	1.87116	2.16e-66	1.1e-65	yes	up
ENSSSCG00000003479	MFAP2	118	18	3.63333	0.49	-2.89044	3.03e-38	1.04e-37	yes	down
ENSSSCG00000003481	PADI1	52.3333	3566	0.466667	29.8	5.99678	0	0	yes	up
ENSSSCG00000003482	PADI3	7.66667	18.6667	0.15	0.34	1.18057	0.0124473	0.0172366	yes	up
ENSSSCG00000003485	-	1919.67	5240.67	19.79	51.4933	1.37961	1.06e-109	8.92e-109	yes	up
ENSSSCG00000003488	UBR4	7073.33	19668.3	18.55	47.7933	1.36539	1.57e-126	1.58e-125	yes	up
ENSSSCG00000003503	-	2	112.333	0.0233333	1.22	5.70834	4.06e-65	2.02e-64	yes	up
ENSSSCG00000003508	KIF17	5.33333	14	0.0666667	0.17	1.3505	0.00487709	0.00696592	yes	up
ENSSSCG00000003509	SH2D5	38.6667	789.667	0.456667	8.67	4.24682	6.27e-261	2.14e-259	yes	up
ENSSSCG00000003511	HP1BP3	1474.67	672.667	17.7267	7.47	-1.24674	1.34e-37	4.55e-37	yes	down
ENSSSCG00000003512	EIF4G3	4329.33	1418.67	30.3333	9.7	-1.64485	1.3e-134	1.42e-133	yes	down
ENSSSCG00000003521	-	1	24.6667	0.0333333	0.746667	4.48543	2.95e-16	6.7e-16	yes	up
ENSSSCG00000003524	C1QA	4.33333	0.666667	0.1	0.0133333	-2.90689	0.017136	0.0234669	yes	down
ENSSSCG00000003527	EPHB2	12.6667	793.333	0.146667	8.32333	5.82655	1.32e-284	5.48e-283	yes	up
ENSSSCG00000003539	GRHL3	0.333333	3.66667	0.00333333	0.0533333	4	0.00890637	0.0124894	yes	up
ENSSSCG00000003541	STPG1	5.66667	0	0.226667	0.001	-7.82443	0.000121455	0.000190329	yes	down
ENSSSCG00000003543	NIPAL3	1017.67	352.667	7.50333	2.44667	-1.61671	2.84e-73	1.57e-72	yes	down
ENSSSCG00000003551	PAQR7	810.667	1936.67	14.23	31.5967	1.15084	3.09e-66	1.56e-65	yes	up
ENSSSCG00000003558	RPS6KA1	236	1669.67	2.97333	19.7733	2.7334	5.27e-188	9.6e-187	yes	up
ENSSSCG00000003561	ZDHHC18	194	1616.67	2.73333	21.4867	2.97471	2.73e-276	1.05e-274	yes	up
ENSSSCG00000003564	GPATCH3	554.667	2386	5.62	22.68	2.01278	5.29e-201	1.1e-199	yes	up
ENSSSCG00000003566	NUDC	3115.7	6450.97	65.9167	135.93	1.04415	1.53e-53	6.51e-53	yes	up
ENSSSCG00000003569	SLC9A1	791.333	1905	6.87333	15.4333	1.16697	8.57e-66	4.31e-65	yes	up
ENSSSCG00000003572	SYTL1	5.23667	16.13	0.0733333	0.226667	1.62803	0.00106089	0.00157982	yes	up
ENSSSCG00000003573	MAP3K6	178.763	504.87	1.51667	4.14	1.44873	7.37e-26	2.04e-25	yes	up
ENSSSCG00000003582	SMPDL3B	173.513	56.5467	3.03333	0.38	-2.99683	7.13e-28	2.05e-27	yes	down
ENSSSCG00000003583	RPA2	494.333	188.333	12.6533	4.46667	-1.50225	1.41e-36	4.71e-36	yes	down
ENSSSCG00000003584	THEMIS2	10	107.333	0.0733333	0.736667	3.32847	2.02e-42	7.34e-42	yes	up
ENSSSCG00000003586	EPB41	1546	670.333	10.4333	3.72667	-1.48524	2.41e-82	1.49e-81	yes	down
ENSSSCG00000003590	PTPRU	793.333	2104.67	5.88333	14.5967	1.31093	2.17e-74	1.21e-73	yes	up
ENSSSCG00000003592	SDC3	1096	2538	8.38	17.9333	1.09762	1.22e-67	6.29e-67	yes	up
ENSSSCG00000003596	SNRNP40	723.333	2740	14.42	50.6533	1.81259	5.87e-162	8.23e-161	yes	up
ENSSSCG00000003600	TINAGL1	5313.67	652.333	115.293	13.1333	-3.134	0	0	yes	down
ENSSSCG00000003601	HCRTR1	20.06	2.66667	0.46	0.0633333	-2.8606	4.35e-09	8.12e-09	yes	down
ENSSSCG00000003603	COL16A1	5753	551.333	44.69	4.00667	-3.47948	0	0	yes	down
ENSSSCG00000003608	LCK	0	2.33333	0.001	0.03	4.90689	0.0261288	0.0351598	yes	up
ENSSSCG00000003610	-	243.973	599.93	4.65667	10.65	1.19348	5.53e-39	1.91e-38	yes	up
ENSSSCG00000003612	EIF3I	2062.25	5688.41	76.5467	194.297	1.34385	8.32e-102	6.43e-101	yes	up
ENSSSCG00000003613	HDAC1	4980.34	16439.3	48.1933	147.247	1.61133	2.12e-182	3.61e-181	yes	up
ENSSSCG00000003616	-	0	6	0.001	0.26	8.02237	4.38e-05	7.02e-05	yes	up
ENSSSCG00000003617	TXLNA	2556.67	7333.33	22.2367	66.06	1.57084	2.63e-135	2.89e-134	yes	up
ENSSSCG00000003619	AZIN2	23	68	0.693333	1.9	1.45438	2.37e-09	4.46e-09	yes	up
ENSSSCG00000003621	ZSCAN20	114.667	399	0.966667	3.13333	1.69661	1.13e-55	4.94e-55	yes	up
ENSSSCG00000003622	CSMD2	7.66667	282.333	0.03	1.00667	5.06848	1.11e-87	7.35e-87	yes	up
ENSSSCG00000003627	ZMYM4	535.653	189.333	3.19667	1.10333	-1.5347	9.31e-46	3.57e-45	yes	down
ENSSSCG00000003628	CLSPN	149.667	63.6667	1.03333	0.416667	-1.31034	4.22e-17	9.75e-17	yes	down
ENSSSCG00000003634	ADPRHL2	613.927	5127.02	15.0433	116.577	2.95408	0	0	yes	up
ENSSSCG00000003642	INPP5B	1610.33	591.667	18.6733	6.38667	-1.54784	1.76e-101	1.35e-100	yes	down
ENSSSCG00000003644	FHL3	1930	11112	46.1567	245.603	2.41172	3.37e-261	1.15e-259	yes	up
ENSSSCG00000003646	POU3F1	0	10.3333	0.001	0.283333	8.14636	2.29e-08	4.18e-08	yes	up
ENSSSCG00000003650	GJA9	18.6667	8.66667	0.506667	0.206667	-1.29373	0.00405699	0.00582205	yes	down
ENSSSCG00000003662	NT5C1A	0	3.33333	0.001	0.116667	6.86625	0.00317438	0.00458494	yes	up
ENSSSCG00000003670	RLF	715.667	301	4.71	1.81333	-1.37708	3.06e-38	1.05e-37	yes	down
ENSSSCG00000003672	CAP1	19193.9	8068.59	228.467	89.6333	-1.34988	3.33e-131	3.52e-130	yes	down
ENSSSCG00000003682	ANKRD12	899	210.667	3.77333	0.813333	-2.21392	1.34e-102	1.05e-101	yes	down
ENSSSCG00000003684	MTCL1	1448.33	6034.33	9.44667	36.8467	1.96366	3.9e-193	7.46e-192	yes	up
ENSSSCG00000003687	EPB41L3	1474.33	459.667	14.65	4.22333	-1.79445	2.74e-84	1.73e-83	yes	down
ENSSSCG00000003691	-	27809.3	15018.3	830.083	371.393	-1.16031	2.48e-60	1.16e-59	yes	down
ENSSSCG00000003694	EMILIN2	130.667	1698.67	1.36667	16.3433	3.57997	3.42e-288	1.48e-286	yes	up
ENSSSCG00000003697	NDC80	138	10.6667	1.11	0.08	-3.79442	3.4e-50	1.39e-49	yes	down
ENSSSCG00000003699	GREB1L	424.667	202	2.98667	1.32667	-1.17073	1.01e-16	2.32e-16	yes	down
ENSSSCG00000003700	ESCO1	152.667	65.6667	1.21667	0.49	-1.31208	1.71e-18	4.07e-18	yes	down
ENSSSCG00000003705	CABLES1	48	328	0.53	3.34667	2.65866	2.99e-76	1.71e-75	yes	up
ENSSSCG00000003707	NPC1	1047.33	2334	9.7	20.11	1.05186	2.46e-51	1.02e-50	yes	up
ENSSSCG00000003710	-	226.667	119.333	1.74667	0.853333	-1.03342	5.87e-19	1.41e-18	yes	down
ENSSSCG00000003714	HRH4	5.33333	71	0.0966667	1.24333	3.68505	1.97e-32	6.14e-32	yes	up
ENSSSCG00000003715	ZNF521	417	1675.33	4.53333	17.11	1.9162	1.44e-117	1.32e-116	yes	up
ENSSSCG00000003716	SS18	1756	887.333	25.1667	12.3067	-1.03207	2.4e-38	8.21e-38	yes	down
ENSSSCG00000003721	CHST9	68.6667	4.66667	1.04333	0.08	-3.70506	7.21e-36	2.37e-35	yes	down
ENSSSCG00000003722	CDH2	2811	1259.67	22.1733	9.35667	-1.24476	1.88e-58	8.57e-58	yes	down
ENSSSCG00000003726	DSC1	2	10.6667	0.0133333	0.0666667	2.32193	0.00204856	0.0029951	yes	up
ENSSSCG00000003728	TRAPPC8	1639.33	650	11.93	4.47333	-1.41517	1.46e-63	7.08e-63	yes	down
ENSSSCG00000003737	NOL4	0.666667	9	0.00666667	0.0766667	3.52356	8.07e-06	1.34e-05	yes	up
ENSSSCG00000003743	GALNT1	5154.67	1120.33	52.43	10.68	-2.29548	1.83e-233	4.91e-232	yes	down
ENSSSCG00000003744	MOCOS	121	1160.33	1.61	14.22	3.14279	4.91e-218	1.17e-216	yes	up
ENSSSCG00000003747	-	150.333	357	4.07667	9.05	1.15053	3.42e-23	8.98e-23	yes	up
ENSSSCG00000003749	PIK3C3	657.667	172.333	8.10333	2.04333	-1.98759	1.43e-90	9.78e-90	yes	down
ENSSSCG00000003755	MCOLN2	8.66667	2	0.123333	0.0266667	-2.20945	0.000735782	0.00110727	yes	down
ENSSSCG00000003757	SSX2IP	244.59	84.0567	1.79667	0.576667	-1.63951	1.11e-31	3.4e-31	yes	down
ENSSSCG00000003760	TTLL7	404.667	54.3333	2.51	0.32	-2.97154	2.2e-96	1.59e-95	yes	down
ENSSSCG00000003762	ADGRL4	89	4	0.963333	0.0366667	-4.71549	5.13e-42	1.86e-41	yes	down
ENSSSCG00000003763	IFI44	1676	226	29.7567	3.82	-2.96157	5.7e-267	2.03e-265	yes	down
ENSSSCG00000003766	DNAJB4	2102	559.667	29.7033	7.78333	-1.93216	1.29e-114	1.14e-113	yes	down
ENSSSCG00000003768	-	4136.67	481	53.87	5.86667	-3.19887	1.04e-205	2.22e-204	yes	down
ENSSSCG00000003770	MIGA1	564.003	98.3333	5.25	0.943333	-2.47648	4.2e-80	2.53e-79	yes	down
ENSSSCG00000003773	AK5	63.6667	19	0.796667	0.213333	-1.90087	1.08e-15	2.43e-15	yes	down
ENSSSCG00000003776	ACADM	1425.67	461	23.7533	7.52667	-1.65805	1.99e-90	1.36e-89	yes	down
ENSSSCG00000003777	SLC44A5	272.333	45.6667	4.23	0.69	-2.61599	2.96e-59	1.36e-58	yes	down
ENSSSCG00000003779	TYW3	89.88	33.2333	0.916667	0.273333	-1.74574	1.13e-15	2.53e-15	yes	down
ENSSSCG00000003780	CRYZ	712.12	242.767	16.18	5.20667	-1.63578	4.28e-69	2.25e-68	yes	down
ENSSSCG00000003783	FPGT	51.9267	12	0.456667	0.0966667	-2.24005	6.88e-16	1.55e-15	yes	down
ENSSSCG00000003784	-	5.74	0.333333	0.21	0.01	-4.39232	0.000154613	0.000241153	yes	down
ENSSSCG00000003788	PTGER3	9.66667	57.3333	0.296667	1.71667	2.5327	2.94e-19	7.12e-19	yes	up
ENSSSCG00000003789	CTH	1705.67	98	36.1033	1.92	-4.23295	0	0	yes	down
ENSSSCG00000003790	ANKRD13C	951	354.667	10.6233	4.87333	-1.12426	5.25e-54	2.25e-53	yes	down
ENSSSCG00000003791	SRSF11	1058.33	362.667	29.9867	9.63333	-1.63821	8.05e-59	3.68e-58	yes	down
ENSSSCG00000003793	-	0.333333	6.66667	0.00333333	0.09	4.75489	9.78e-05	0.000154064	yes	up
ENSSSCG00000003805	PDE4B	28.0233	6	0.256667	0.05	-2.3599	1.92e-05	3.13e-05	yes	down
ENSSSCG00000003807	DNAJC6	98.6667	337.333	0.903333	3.25333	1.84859	2.88e-42	1.05e-41	yes	up
ENSSSCG00000003814	EFCAB7	144.667	12.3333	2.36	0.203333	-3.53687	6.66e-68	3.45e-67	yes	down
ENSSSCG00000003815	ALG6	264	36.6667	5.24	0.683333	-2.93891	2.95e-88	1.96e-87	yes	down
ENSSSCG00000003816	ATG4C	165.667	30.6667	2.54667	0.62	-2.03827	1.04e-41	3.75e-41	yes	down
ENSSSCG00000003818	DOCK7	2315.93	791.163	12.0667	3.82333	-1.65812	2.11e-108	1.74e-107	yes	down
ENSSSCG00000003820	USP1	999.74	352.837	9.88333	3.59667	-1.45834	1.58e-57	7.11e-57	yes	down
ENSSSCG00000003828	FGGY	133.333	57	2.68333	1.05	-1.35364	8.04e-18	1.88e-17	yes	down
ENSSSCG00000003831	OMA1	113.667	58.6667	1.66667	0.783333	-1.08927	1.59e-08	2.91e-08	yes	down
ENSSSCG00000003832	TACSTD2	21.6667	141.333	0.426667	2.68	2.65105	1.01e-38	3.49e-38	yes	up
ENSSSCG00000003834	C8B	0	2.33333	0.001	0.02	4.32193	0.0201112	0.0273446	yes	up
ENSSSCG00000003843	PARS2	213.333	668.667	3.27667	9.49333	1.53469	4e-63	1.93e-62	yes	up
ENSSSCG00000003844	-	484	1520.67	10.0833	30.03	1.57443	5.12e-107	4.18e-106	yes	up
ENSSSCG00000003848	LRP8	354	153.667	5.26333	2.12667	-1.30738	1.41e-18	3.37e-18	yes	down
ENSSSCG00000003854	ECHDC2	430	141.333	10.3967	2.75	-1.91862	4.85e-45	1.84e-44	yes	down
ENSSSCG00000003859	ZCCHC11	500.667	238.667	3.61667	1.64667	-1.13511	8.51e-27	2.39e-26	yes	down
ENSSSCG00000003868	-	5	25.3333	0.526667	2.50667	2.25081	4.6e-08	8.28e-08	yes	up
ENSSSCG00000003870	NRDC	1822.33	793.333	19.5	7.96667	-1.29143	4.29e-76	2.46e-75	yes	down
ENSSSCG00000003872	EPS15	2450.67	999.333	23.94	10.61	-1.174	3.86e-92	2.69e-91	yes	down
ENSSSCG00000003881	SPATA6	246.333	75.3333	3.63333	1.37667	-1.40011	2.35e-39	8.14e-39	yes	down
ENSSSCG00000003884	FOXE3	0	11.3333	0.001	0.44	8.78136	2.32e-08	4.24e-08	yes	up
ENSSSCG00000003885	CMPK1	2519.67	721.667	47.2267	12.6833	-1.89667	1.77e-147	2.19e-146	yes	down
ENSSSCG00000003895	EFCAB14	1442	516.667	12.1467	3.80333	-1.67522	2.71e-100	2.06e-99	yes	down
ENSSSCG00000003897	-	338.333	3602.33	4.93667	48.8267	3.30606	0	0	yes	up
ENSSSCG00000003901	FAAH	155	1035.33	2.54333	15.0367	2.56369	4.95e-128	5.1e-127	yes	up
ENSSSCG00000003903	-	2523.33	1284.33	180.833	85.6867	-1.07752	3.03e-57	1.36e-56	yes	down
ENSSSCG00000003904	LRRC41	1665.06	6008.31	28.1533	94.2733	1.74354	6.98e-176	1.11e-174	yes	up
ENSSSCG00000003905	RAD54L	476.607	1314.36	2.87	7.28333	1.34355	2.28e-45	8.68e-45	yes	up
ENSSSCG00000003909	PIK3R3	406	72	3.32	0.66	-2.33065	3.84e-101	2.94e-100	yes	down
ENSSSCG00000003913	MAST2	1818.67	6533.33	15.1433	50.35	1.73331	7.58e-157	1.01e-155	yes	up
ENSSSCG00000003914	-	7104.72	24010.2	269.35	837.59	1.63676	3.1e-136	3.46e-135	yes	up
ENSSSCG00000003918	TOE1	88.4867	319.9	2.39333	8.06333	1.75236	1.74e-48	6.94e-48	yes	up
ENSSSCG00000003919	MUTYH	170.287	654.58	1.56333	4.47667	1.5178	5.45e-64	2.66e-63	yes	up
ENSSSCG00000003920	HPDL	11.7133	399.753	0.423333	13.5333	4.99858	4.16e-172	6.41e-171	yes	up
ENSSSCG00000003921	ZSWIM5	5	126.423	0.0566667	1.19	4.39232	2.8e-47	1.1e-46	yes	up
ENSSSCG00000003923	HECTD3	1521.33	4368.33	17.7867	49.37	1.47284	2.37e-110	2e-109	yes	up
ENSSSCG00000003926	-	15	62.6667	0.783333	3.06333	1.9674	4.06e-15	8.96e-15	yes	up
ENSSSCG00000003941	SZT2	800.257	3229.46	3.66333	13.6333	1.89591	1.13e-157	1.52e-156	yes	up
ENSSSCG00000003943	MED8	824.667	4907.67	27.9667	153.447	2.45596	5.08e-293	2.24e-291	yes	up
ENSSSCG00000003964	PPIH	445	962.667	23.28	46.7133	1.00474	2.96e-27	8.42e-27	yes	up
ENSSSCG00000003965	-	69.8967	13.3567	1.01667	0.193333	-2.39468	1.12e-21	2.88e-21	yes	down
ENSSSCG00000003966	-	596.77	1508.64	5.30667	12.46	1.23143	2.44e-68	1.27e-67	yes	up
ENSSSCG00000003967	ZMYND12	5.66667	33.6667	0.126667	0.706667	2.47999	1.27e-11	2.55e-11	yes	up
ENSSSCG00000003968	RIMKLA	8.66667	138.667	0.243333	3.72	3.9343	2.59e-54	1.12e-53	yes	up
ENSSSCG00000003971	SCMH1	401.667	225.333	6.97667	3.41333	-1.03136	3.4e-15	7.53e-15	yes	down
ENSSSCG00000003973	CTPS1	870.333	5401	12.7833	73.95	2.53229	0	0	yes	up
ENSSSCG00000003975	KCNQ4	1	34.6667	0.02	0.663333	5.05166	9.13e-21	2.3e-20	yes	up
ENSSSCG00000003976	NFYC	756	2144	16.0667	43.89	1.44982	4.37e-65	2.17e-64	yes	up
ENSSSCG00000003980	EXO5	124.447	695.4	2.32333	12.21	2.3938	3.07e-106	2.49e-105	yes	up
ENSSSCG00000003981	ZFP69B	427.667	217.333	5.83667	2.71667	-1.10331	2.55e-23	6.72e-23	yes	down
ENSSSCG00000003983	SMAP2	8078.67	4330.33	103.063	51.38	-1.00425	1.38e-74	7.72e-74	yes	down
ENSSSCG00000003986	-	176.523	825.343	3.18667	13.4633	2.07892	3.71e-108	3.06e-107	yes	up
ENSSSCG00000003987	ZSCAN4	56.1867	190.39	0.583333	1.82333	1.64419	2.69e-08	4.89e-08	yes	up
ENSSSCG00000003988	-	2.66667	21	0.0633333	0.476667	2.91194	6.5e-09	1.21e-08	yes	up
ENSSSCG00000003989	-	36.4967	77.6667	0.533333	1.08	1.01792	8.09e-06	1.34e-05	yes	up
ENSSSCG00000003990	ZNF671	78.6933	334.343	0.913333	3.84	2.07189	1.37e-49	5.56e-49	yes	up
ENSSSCG00000003998	ZNF274	144.333	955.333	0.87	5.34667	2.61955	1.03e-115	9.2e-115	yes	up
ENSSSCG00000004001	A1BG	0	28.3333	0.001	0.65	9.3443	8.36e-21	2.1e-20	yes	up
ENSSSCG00000004002	RPS5	11417.7	30192.3	356.147	873.037	1.29357	8.57e-91	5.88e-90	yes	up
ENSSSCG00000004004	ZNF584	103.847	239.76	1.62	3.44667	1.08921	4.98e-19	1.2e-18	yes	up
ENSSSCG00000004010	ERMARD	136	499	2.05667	7.47333	1.86144	8.71e-53	3.69e-52	yes	up
ENSSSCG00000004012	THBS2	8156.33	1301	57.3867	8.56667	-2.74391	0	0	yes	down
ENSSSCG00000004017	FRMD1	14.3333	1102	0.21	14.4533	6.10487	1.29e-296	5.84e-295	yes	up
ENSSSCG00000004020	SFT2D1	862.667	442	31.1033	14.96	-1.05596	3.33e-32	1.03e-31	yes	down
ENSSSCG00000004022	RPS6KA2	869.333	384	8.40667	3.88667	-1.113	3.24e-52	1.36e-51	yes	down
ENSSSCG00000004027	PDE10A	0	9.33333	0.001	0.146667	7.1964	2.28e-07	4e-07	yes	up
ENSSSCG00000004037	MAP3K4	465	1377	3.44333	9.53333	1.46917	9.58e-90	6.5e-89	yes	up
ENSSSCG00000004039	SLC22A3	0.333333	23.6667	0.00333333	0.153333	5.52356	1.7e-16	3.87e-16	yes	up
ENSSSCG00000004041	SLC22A1	0.333333	6.33333	0.00666667	0.126667	4.24793	0.000485104	0.000737753	yes	up
ENSSSCG00000004046	PNLDC1	0	3.66667	0.001	0.0933333	6.54432	0.00174236	0.00256067	yes	up
ENSSSCG00000004047	MRPL18	357.667	888.333	15.6167	36.7967	1.23649	9.8e-45	3.69e-44	yes	up
ENSSSCG00000004052	FNDC1	7	30.3333	0.0533333	0.216667	2.02237	7.01e-09	1.3e-08	yes	up
ENSSSCG00000004053	TAGAP	60.3333	339.333	0.583333	3	2.36257	5.04e-51	2.08e-50	yes	up
ENSSSCG00000004071	-	78.3333	368	1.29333	5.63	2.12204	1.92e-62	9.21e-62	yes	up
ENSSSCG00000004089	RMND1	239.667	107.333	4.23333	1.76	-1.26622	1.01e-20	2.54e-20	yes	down
ENSSSCG00000004090	ZBTB2	226.333	618.667	2.81667	7.18	1.35	1.28e-42	4.69e-42	yes	up
ENSSSCG00000004094	PPP1R14C	0.666667	55	0.0133333	0.953333	6.15987	4.6e-36	1.52e-35	yes	up
ENSSSCG00000004096	-	19.09	88.9833	1.20667	5.09667	2.07853	1.82e-16	4.15e-16	yes	up
ENSSSCG00000004110	TAB2	2815.67	1102.67	27.5533	10.05	-1.45503	1.54e-77	8.98e-77	yes	down
ENSSSCG00000004113	STXBP5	325	134.333	2.59333	1.03667	-1.32286	2.06e-20	5.13e-20	yes	down
ENSSSCG00000004123	UTRN	8245	1505.33	45.0033	6.54333	-2.78193	6.36e-209	1.39e-207	yes	down
ENSSSCG00000004132	PHACTR2	592.667	107.333	5.62667	1.25333	-2.16651	7.66e-100	5.78e-99	yes	down
ENSSSCG00000004133	FUCA2	1358	499	16.4567	5.64667	-1.5432	4.81e-91	3.31e-90	yes	down
ENSSSCG00000004134	PEX3	382.333	82.2133	7.74333	1.60667	-2.26888	8.12e-66	4.08e-65	yes	down
ENSSSCG00000004136	AIG1	1176.35	416.333	32.0933	11.6333	-1.46401	1.07e-101	8.29e-101	yes	down
ENSSSCG00000004138	HIVEP2	1205.33	2735	5.64333	12.5767	1.15613	5.77e-47	2.25e-46	yes	up
ENSSSCG00000004139	ADGRG6	2334.33	1178	13.59	6.43667	-1.07816	2.36e-37	7.96e-37	yes	down
ENSSSCG00000004142	CITED2	2357	9914.67	34.2433	125.777	1.87697	2.53e-277	9.83e-276	yes	up
ENSSSCG00000004144	HECA	159.333	367.333	4.58	9.95333	1.11983	5.13e-20	1.27e-19	yes	up
ENSSSCG00000004145	-	131	34.6667	3.71667	0.973333	-1.933	9.56e-18	2.23e-17	yes	down
ENSSSCG00000004149	NHSL1	87	501	0.586667	3.43667	2.5504	1.11e-104	8.84e-104	yes	up
ENSSSCG00000004150	-	764.667	329.333	13.5433	5.39	-1.32923	2.15e-54	9.26e-54	yes	down
ENSSSCG00000004154	TNFAIP3	456.333	1358.67	3.94333	11.0067	1.48089	5.01e-40	1.76e-39	yes	up
ENSSSCG00000004157	IL20RA	14	36.3333	0.15	0.363333	1.27633	9.52e-05	0.000150104	yes	up
ENSSSCG00000004159	SLC35D3	1.33333	23.6667	0.02	0.363333	4.18322	5.59e-14	1.2e-13	yes	up
ENSSSCG00000004164	MTFR2	116	49.3333	1.09	0.433333	-1.33078	1.17e-13	2.48e-13	yes	down
ENSSSCG00000004165	PDE7B	60.6667	23	0.476667	0.17	-1.48745	7.7e-11	1.51e-10	yes	down
ENSSSCG00000004166	AHI1	336.667	104.333	2.84	0.956667	-1.5698	2.21e-26	6.19e-26	yes	down
ENSSSCG00000004167	MYB	0.666667	13.3333	0.00666667	0.126667	4.24793	5.85e-09	1.09e-08	yes	up
ENSSSCG00000004172	SLC2A12	26.35	4.20667	0.276667	0.0466667	-2.56768	3.66e-12	7.46e-12	yes	down
ENSSSCG00000004178	SLC18B1	285.333	126.333	1.64	0.68	-1.27009	2.04e-21	5.2e-21	yes	down
ENSSSCG00000004179	VNN2	8.33333	0	0.23	0.001	-7.84549	4.68e-07	8.13e-07	yes	down
ENSSSCG00000004181	VNN1	4.33333	0.666667	0.1	0.0166667	-2.58496	0.0287895	0.0385932	yes	down
ENSSSCG00000004190	STX7	1888.33	956.333	27.2	12.8433	-1.08259	3.16e-48	1.26e-47	yes	down
ENSSSCG00000004193	ENPP1	2982.67	316	38.9967	3.64333	-3.42002	2.19e-302	1.05e-300	yes	down
ENSSSCG00000004195	ARG1	1.33333	25	0.0366667	0.64	4.12553	1.73e-12	3.56e-12	yes	up
ENSSSCG00000004199	EPB41L2	6822	3053.33	64.65	27.1167	-1.25347	2.1e-78	1.23e-77	yes	down
ENSSSCG00000004201	TMEM200A	1548.33	396.333	42.5633	10.2933	-2.0479	1.37e-110	1.15e-109	yes	down
ENSSSCG00000004203	L3MBTL3	561	233.667	6.28333	2.52333	-1.3162	9.73e-43	3.56e-42	yes	down
ENSSSCG00000004205	ARHGAP18	2278.67	171	32.0133	2.28667	-3.80735	1.07e-260	3.61e-259	yes	down
ENSSSCG00000004207	-	89.3333	6.33333	1.05	0.0733333	-3.83978	9.61e-35	3.1e-34	yes	down
ENSSSCG00000004215	-	103.793	18.5967	0.58	0.1	-2.53605	2.73e-33	8.63e-33	yes	down
ENSSSCG00000004216	ECHDC1	1059.48	270.003	11.4133	2.31667	-2.3006	8.15e-123	7.94e-122	yes	down
ENSSSCG00000004218	RSPO3	353.667	136.667	6.48	2.17667	-1.57387	7.73e-35	2.5e-34	yes	down
ENSSSCG00000004225	-	16	6.33333	0.586667	0.22	-1.41504	0.00069097	0.00104149	yes	down
ENSSSCG00000004232	CLVS2	0	8	0.001	0.11	6.78136	1.81e-06	3.08e-06	yes	up
ENSSSCG00000004233	SMPDL3A	918.333	29.3333	6.35333	0.19	-5.06344	5.61597857722982e-311	0	yes	down
ENSSSCG00000004236	PKIB	45.6667	14	0.986667	0.283333	-1.80006	1.37e-11	2.74e-11	yes	down
ENSSSCG00000004237	SERINC1	5013.34	1829.18	69.86	23.28	-1.58538	2.21e-87	1.46e-86	yes	down
ENSSSCG00000004241	GJA1	13327	3314.33	159.563	37.2933	-2.09714	4.26e-167	6.26e-166	yes	down
ENSSSCG00000004242	TBC1D32	145	49.3333	1.01667	0.356667	-1.5112	6.19e-22	1.59e-21	yes	down
ENSSSCG00000004244	MAN1A1	1830.33	688.667	14.5367	5.24667	-1.47022	6.18e-48	2.45e-47	yes	down
ENSSSCG00000004245	-	118.333	34.6667	1.14333	0.306667	-1.8985	1.99e-21	5.07e-21	yes	down
ENSSSCG00000004254	DCBLD1	1985	964	19.1133	8.66333	-1.14159	4.53e-74	2.52e-73	yes	down
ENSSSCG00000004255	VGLL2	0	3.66667	0.001	0.123333	6.94642	0.00749101	0.0105483	yes	up
ENSSSCG00000004272	LMBRD1	504	192	6.42667	2.29	-1.48872	2.04e-38	6.99e-38	yes	down
ENSSSCG00000004275	FAM135A	486	208.333	3.93	1.78333	-1.13995	2.48e-25	6.79e-25	yes	down
ENSSSCG00000004279	OGFRL1	521	111.333	3.18	0.656667	-2.27579	3.41e-67	1.75e-66	yes	down
ENSSSCG00000004280	RIMS1	28.3333	73	0.256667	0.836667	1.70476	4.92e-09	9.18e-09	yes	up
ENSSSCG00000004281	KCNQ5	40.6667	690	0.35	5.84	4.06054	1.02e-157	1.38e-156	yes	up
ENSSSCG00000004289	CEP162	147.693	21.0033	0.623333	0.08	-2.96193	1.2e-49	4.86e-49	yes	down
ENSSSCG00000004290	TBX18	3	45.3333	0.0233333	0.336667	3.85086	1.97e-23	5.22e-23	yes	up
ENSSSCG00000004291	NT5E	2224	235	25.3233	2.50333	-3.33855	0	0	yes	down
ENSSSCG00000004293	SNX14	1841.33	353.667	27.6533	4.98	-2.47324	5.99e-199	1.21e-197	yes	down
ENSSSCG00000004301	-	12.6667	2.66667	0.523333	0.0933333	-2.48727	1.06e-05	1.75e-05	yes	down
ENSSSCG00000004302	-	11.6667	1.66667	0.2	0.03	-2.73697	2.82e-06	4.75e-06	yes	down
ENSSSCG00000004303	RARS2	563.667	281.3	11.22	5.30667	-1.08019	8.85e-33	2.77e-32	yes	down
ENSSSCG00000004304	SLC35A1	1475.33	364.667	28.7933	6.62333	-2.12011	8.06e-136	8.94e-135	yes	down
ENSSSCG00000004306	ORC3	324.667	96.3667	4.82	1.46667	-1.71649	1.64e-49	6.65e-49	yes	down
ENSSSCG00000004307	AKIRIN2	2143	6226.67	46.38	120.547	1.37802	1.91e-89	1.29e-88	yes	up
ENSSSCG00000004311	RNGTT	435	149.333	4.25	1.62667	-1.38554	5.38e-44	2.01e-43	yes	down
ENSSSCG00000004324	LYRM2	245.667	68.3333	8.99667	2.29667	-1.96985	1.29e-43	4.79e-43	yes	down
ENSSSCG00000004330	GJA10	2.33333	0	0.0566667	0.001	-5.82443	0.0207821	0.0282206	yes	down
ENSSSCG00000004331	CASP8AP2	277.333	52.6667	1.69	0.3	-2.49399	2.97e-54	1.28e-53	yes	down
ENSSSCG00000004332	BACH2	18.3333	98.6667	0.113333	0.566667	2.32193	7.24e-18	1.69e-17	yes	up
ENSSSCG00000004336	EPHA7	3	18.3333	0.03	0.146667	2.28951	3.81e-06	6.39e-06	yes	up
ENSSSCG00000004338	FUT9	65.3333	12	2.23667	0.386667	-2.53219	4.95e-17	1.14e-16	yes	down
ENSSSCG00000004339	UFL1	687.333	239	7.56333	3.27667	-1.20679	1.3e-51	5.4e-51	yes	down
ENSSSCG00000004344	MMS22L	116.863	18	0.653333	0.1	-2.70782	4.14e-45	1.57e-44	yes	down
ENSSSCG00000004349	FAXC	384.83	168.77	10.6767	3.87667	-1.46157	1.07e-33	3.4e-33	yes	down
ENSSSCG00000004351	USP45	157.333	20.6667	1.59667	0.2	-2.99699	5.85e-50	2.39e-49	yes	down
ENSSSCG00000004353	-	760.667	258.333	14.68	5.18	-1.50283	4.53e-69	2.38e-68	yes	down
ENSSSCG00000004355	-	0	4.07333	0.001	0.13	7.02237	0.0010828	0.00161174	yes	up
ENSSSCG00000004358	ASCC3	2581.67	1330	13.7533	6.69	-1.0397	4.11e-38	1.4e-37	yes	down
ENSSSCG00000004364	HACE1	1374.67	482	15.8333	5.26667	-1.588	9.2e-77	5.31e-76	yes	down
ENSSSCG00000004367	POPDC3	3.33333	107.333	0.0566667	2.24667	5.30914	1.08e-60	5.07e-60	yes	up
ENSSSCG00000004382	SEC63	3648.67	989.333	33.79	8.53667	-1.98485	4.08e-172	6.3e-171	yes	down
ENSSSCG00000004383	OSTM1	1573.33	302.333	18.8733	3.59	-2.39429	7.87e-115	6.96e-114	yes	down
ENSSSCG00000004384	NR2E1	8	31	0.103333	0.366667	1.82716	6.01e-07	1.04e-06	yes	up
ENSSSCG00000004385	SNX3	2773.33	1460	72.8167	35.65	-1.03037	3.17e-41	1.13e-40	yes	down
ENSSSCG00000004388	-	34.3333	5.33333	0.68	0.0966667	-2.81444	2.69e-13	5.65e-13	yes	down
ENSSSCG00000004390	SESN1	429.333	99.6667	5.80333	1.14333	-2.34364	3e-58	1.36e-57	yes	down
ENSSSCG00000004391	CEP57L1	30.6667	6.66667	0.633333	0.126667	-2.32193	1.61e-09	3.05e-09	yes	down
ENSSSCG00000004393	GTF3C6	694.333	325.667	13.7267	5.98333	-1.19796	1.42e-24	3.82e-24	yes	down
ENSSSCG00000004399	SLC22A16	0	4.33333	0.001	0.0333333	5.05889	0.000787979	0.00118319	yes	up
ENSSSCG00000004401	DDO	28	4.33333	0.56	0.0733333	-2.93289	4.48e-13	9.35e-13	yes	down
ENSSSCG00000004402	-	2.66667	0	0.0633333	0.001	-5.98489	0.018934	0.0258206	yes	down
ENSSSCG00000004405	FIG4	588.667	201	6.77333	2.12333	-1.67354	1.02e-47	4.01e-47	yes	down
ENSSSCG00000004408	SMPD2	308.467	1306.3	5.32333	21.0133	1.9809	9e-92	6.24e-91	yes	up
ENSSSCG00000004411	ZBTB24	178	528	1.99667	5.51667	1.4662	5.43e-48	2.15e-47	yes	up
ENSSSCG00000004412	MICAL1	4789.87	21835.7	48.2867	203.53	2.07554	1.28e-209	2.83e-208	yes	up
ENSSSCG00000004414	CD164	16230.3	4635	193.22	51.44	-1.90928	1.55e-194	3.01e-193	yes	down
ENSSSCG00000004415	-	18.3333	3	0.116667	0.0166667	-2.80735	8.37e-08	1.49e-07	yes	down
ENSSSCG00000004423	TUBE1	62.95	15.6667	0.966667	0.223333	-2.11382	4.31e-15	9.51e-15	yes	down
ENSSSCG00000004433	HS3ST5	0.666667	16	0.00666667	0.21	4.97728	2.17e-10	4.22e-10	yes	up
ENSSSCG00000004446	RWDD1	1153.67	455	15.6433	5.75	-1.44391	2.12e-45	8.09e-45	yes	down
ENSSSCG00000004453	SNAP91	0	11.6667	0.001	0.14	7.12928	2.07e-08	3.78e-08	yes	up
ENSSSCG00000004460	IBTK	924.333	288	6.24	1.81667	-1.78025	2.68e-64	1.32e-63	yes	down
ENSSSCG00000004465	BCKDHB	164	73.6667	4.04667	1.70667	-1.24555	9.49e-20	2.33e-19	yes	down
ENSSSCG00000004466	TTK	129.667	8.66667	1.12667	0.07	-4.00856	2.86e-68	1.49e-67	yes	down
ENSSSCG00000004469	LCA5	45.3333	18.3333	0.46	0.2	-1.20163	0.000635268	0.000959582	yes	down
ENSSSCG00000004470	HMGN3	567.667	150.667	24.91	6.19	-2.00871	3.46e-79	2.06e-78	yes	down
ENSSSCG00000004472	IRAK1BP1	117.667	59.6667	1.49333	0.703333	-1.08626	9.53e-11	1.87e-10	yes	down
ENSSSCG00000004478	MYO6	1324.67	567.667	14.1967	5.67667	-1.32244	1.13e-35	3.7e-35	yes	down
ENSSSCG00000004479	FILIP1	244.667	60	2.32	0.5	-2.21412	3.84e-45	1.46e-44	yes	down
ENSSSCG00000004484	COL12A1	14953.3	5974	61.5067	22.9467	-1.42246	2.68e-88	1.79e-87	yes	down
ENSSSCG00000004485	CD109	2457	806	13.6933	4.17667	-1.71305	1.23e-125	1.23e-124	yes	down
ENSSSCG00000004490	SETBP1	98	432.333	0.643333	2.65667	2.04598	5.67e-66	2.86e-65	yes	up
ENSSSCG00000004493	SIGLEC15	0.333333	11.6667	0.00333333	0.123333	5.20945	1.01e-08	1.86e-08	yes	up
ENSSSCG00000004497	PSTPIP2	16.3333	4	0.286667	0.09	-1.67138	7.79e-06	1.29e-05	yes	down
ENSSSCG00000004498	HAUS1	241.333	97.6667	9.03667	3.39	-1.41451	1.12e-25	3.1e-25	yes	down
ENSSSCG00000004500	C18orf25	429.333	933.667	3.19667	6.48333	1.02017	8.11e-30	2.41e-29	yes	up
ENSSSCG00000004507	SMAD7	1561.33	766.333	11.9533	5.45667	-1.13132	1.44e-51	6.01e-51	yes	down
ENSSSCG00000004508	DYM	1920.33	639.333	26.5033	8.46	-1.64744	8.9e-107	7.26e-106	yes	down
ENSSSCG00000004509	LIPG	38998.7	7028.33	398.477	68.5767	-2.53871	6.28e-144	7.53e-143	yes	down
ENSSSCG00000004511	MYO5B	38.3333	1199	0.246667	7.25667	4.87867	0	0	yes	up
ENSSSCG00000004517	CXXC1	526	1152.33	3.77333	7.68667	1.02652	5.94e-35	1.92e-34	yes	up
ENSSSCG00000004518	-	79.6667	25	2.83	0.843333	-1.74663	1.12e-11	2.25e-11	yes	down
ENSSSCG00000004522	ME2	1257.33	661.667	16.5733	7.88333	-1.07199	1.73e-33	5.46e-33	yes	down
ENSSSCG00000004530	STARD6	221.333	8.66667	13.4133	0.49	-4.77474	1.33e-87	8.8e-87	yes	down
ENSSSCG00000004531	C18orf54	524.333	84	4.80333	0.973333	-2.30303	2.1e-101	1.61e-100	yes	down
ENSSSCG00000004534	CCDC68	6	0	0.0366667	0.001	-5.1964	0.000113231	0.00017777	yes	down
ENSSSCG00000004535	TCF4	640	172	8.34	2.31333	-1.85007	2.8e-76	1.61e-75	yes	down
ENSSSCG00000004543	MTFMT	233.333	82	6.19667	2.01333	-1.62191	3.47e-26	9.68e-26	yes	down
ENSSSCG00000004547	-	1801.33	4811	14.94	37.7	1.33538	1.67e-113	1.46e-112	yes	up
ENSSSCG00000004551	ZNF609	1743.33	3645.67	10.13	20.91	1.04556	1.8e-46	6.96e-46	yes	up
ENSSSCG00000004554	PCLAF	380	3.33333	9.16667	0.0766667	-6.90165	1.51e-157	2.04e-156	yes	down
ENSSSCG00000004558	CSNK1G1	885.667	2144.67	8.14667	18.51	1.18402	5.76e-53	2.45e-52	yes	up
ENSSSCG00000004561	HERC1	4816.33	1508.33	12.9633	3.76667	-1.78308	6.23e-116	5.6e-115	yes	down
ENSSSCG00000004570	TPM1	115787	9955.67	2105.54	214.117	-3.29772	0	0	yes	down
ENSSSCG00000004572	-	7.62667	42.3333	0.193333	1.03	2.41348	2.11e-13	4.45e-13	yes	up
ENSSSCG00000004573	-	7.66667	53	0.196667	1.31	2.73574	1.23e-19	3e-19	yes	up
ENSSSCG00000004577	ICE2	196.667	69.6667	1.47667	0.516667	-1.51504	3.52e-28	1.02e-27	yes	down
ENSSSCG00000004583	-	356	126	8.59	2.81333	-1.61038	2.98e-31	9.08e-31	yes	down
ENSSSCG00000004584	GCNT3	4.66667	11	0.0733333	0.17	1.21299	0.0290401	0.0389106	yes	up
ENSSSCG00000004586	-	557.333	76.3333	7.52	1.17333	-2.68012	6.51e-137	7.31e-136	yes	down
ENSSSCG00000004588	CCNB2	192	47	3.81667	0.876667	-2.12221	3.05e-27	8.67e-27	yes	down
ENSSSCG00000004589	RNF111	716	1443	6.45667	13.02	1.01187	1.77e-29	5.24e-29	yes	up
ENSSSCG00000004595	ADAM10	1438	375	10.9	2.7	-2.0133	3.3e-83	2.06e-82	yes	down
ENSSSCG00000004598	MYZAP	301	73	6.17667	1.30333	-2.24462	1.95e-63	9.44e-63	yes	down
ENSSSCG00000004601	MNS1	43.4133	6	0.34	0.04	-3.08746	6.2e-18	1.45e-17	yes	down
ENSSSCG00000004602	-	14.5867	3	0.413333	0.0833333	-2.31034	4.19e-06	7.02e-06	yes	down
ENSSSCG00000004608	DNAAF4	15.6667	0.333333	0.393333	0.01	-5.29768	1.34e-11	2.68e-11	yes	down
ENSSSCG00000004610	CCPG1	4822.45	279.877	42.07	2.38667	-4.13972	0	0	yes	down
ENSSSCG00000004612	RAB27A	208	40.3333	3.17667	0.59	-2.42873	3.17e-48	1.26e-47	yes	down
ENSSSCG00000004614	UNC13C	54.6667	8.66667	0.27	0.0433333	-2.63941	1.01e-18	2.42e-18	yes	down
ENSSSCG00000004616	ONECUT1	0.666667	9.33333	0.00666667	0.09	3.75489	1.16e-05	1.91e-05	yes	up
ENSSSCG00000004617	-	1121.67	172.333	8.90333	1.25	-2.83242	3.49e-188	6.35e-187	yes	down
ENSSSCG00000004620	MYO5A	6310.02	2489.69	52.8667	19.4033	-1.44605	1.64e-88	1.1e-87	yes	down
ENSSSCG00000004621	MYO5C	7.66667	2	0.0433333	0.0133333	-1.70044	0.00385397	0.00553962	yes	down
ENSSSCG00000004622	GNB5	1053.67	1528	12.9267	28.2633	1.12858	2.76e-10	5.35e-10	yes	up
ENSSSCG00000004624	-	3201.33	1109.67	30.4967	10.9533	-1.47728	6.87e-98	5.06e-97	yes	down
ENSSSCG00000004626	TMOD3	1127.41	556.26	12.47	5.73667	-1.12018	3.23e-23	8.51e-23	yes	down
ENSSSCG00000004628	TMOD2	194.593	51.74	1.37	0.273333	-2.32544	8.57e-25	2.32e-24	yes	down
ENSSSCG00000004629	-	9.58667	36.9533	0.36	1.10333	1.6158	3.61e-07	6.29e-07	yes	up
ENSSSCG00000004632	GLDN	439.667	15	3.90333	0.12	-5.0236	2.28e-202	4.79e-201	yes	down
ENSSSCG00000004635	SPPL2A	1352.06	395.943	11.3767	3.26	-1.80313	5.45e-102	4.22e-101	yes	down
ENSSSCG00000004636	TRPM7	1263	319.667	7.42333	1.80333	-2.0414	1.23e-149	1.54e-148	yes	down
ENSSSCG00000004639	USP8	1077.33	379.667	8.35333	2.8	-1.57693	9.81e-53	4.15e-52	yes	down
ENSSSCG00000004643	SLC27A2	95.4767	24.3333	0.986667	0.243333	-2.01963	1.82e-19	4.42e-19	yes	down
ENSSSCG00000004644	HDC	598.857	31.6667	3.32667	0.16	-4.37793	1.7e-225	4.27e-224	yes	down
ENSSSCG00000004647	-	236.667	87	6.17	2.14333	-1.52541	3.15e-19	7.61e-19	yes	down
ENSSSCG00000004648	-	54.0933	13.6767	1.44	0.32	-2.16993	2.11e-13	4.45e-13	yes	down
ENSSSCG00000004651	GALK2	719.24	363.99	15.7267	7.67667	-1.03466	3.01e-38	1.03e-37	yes	down
ENSSSCG00000004652	COPS2	1398.33	585	15.4533	5.99	-1.36729	5.14e-41	1.83e-40	yes	down
ENSSSCG00000004653	SECISBP2L	2714.67	699.333	15.05	3.63	-2.05172	2.06e-132	2.2e-131	yes	down
ENSSSCG00000004656	-	180.667	67	12.6733	4.42	-1.51968	6.25e-26	1.73e-25	yes	down
ENSSSCG00000004658	FBN1	32350.3	8245.33	136.17	32.71	-2.05761	1.52e-124	1.51e-123	yes	down
ENSSSCG00000004661	MYEF2	1069.81	216.2	14.5867	3.45	-2.07998	6.73e-98	4.96e-97	yes	down
ENSSSCG00000004668	SLC30A4	451.667	155.333	3.53	1.27	-1.47484	3.52e-40	1.24e-39	yes	down
ENSSSCG00000004670	C15orf48	6.66667	160.667	0.246667	5.69	4.52779	1.67e-60	7.83e-60	yes	up
ENSSSCG00000004672	GATM	41	258.333	0.263333	1.57	2.5758	1.33e-66	6.75e-66	yes	up
ENSSSCG00000004675	DUOX1	19.4733	157.353	0.153333	1.2	2.96829	2.47e-52	1.04e-51	yes	up
ENSSSCG00000004694	FRMD5	9	3.33333	0.153333	0.0466667	-1.71621	0.0163845	0.0224721	yes	down
ENSSSCG00000004695	WDR76	145.79	64.36	1.93	0.736667	-1.38952	1.43e-15	3.2e-15	yes	down
ENSSSCG00000004700	PDIA3	16279.3	3398	435.53	84.68	-2.36268	0	0	yes	down
ENSSSCG00000004701	-	63.6667	28.6667	0.693333	0.296667	-1.22471	4.68e-08	8.42e-08	yes	down
ENSSSCG00000004702	STRC	0.333333	7	0.00333333	0.05	3.90689	0.000187546	0.000291258	yes	up
ENSSSCG00000004703	-	0.333333	6.33333	0.00666667	0.133333	4.32193	0.000101257	0.000159384	yes	up
ENSSSCG00000004711	LCMT2	136.317	415.797	2.46333	7.00333	1.50743	1.38e-48	5.52e-48	yes	up
ENSSSCG00000004714	EPB42	48.82	20.68	0.373333	0.14	-1.41504	9.72e-08	1.73e-07	yes	down
ENSSSCG00000004717	UBR1	870.333	164	5.33	0.976667	-2.4482	4.6e-122	4.45e-121	yes	down
ENSSSCG00000004719	CDAN1	156.333	1340.67	1.74	13.7133	2.97842	2.54e-217	6.04e-216	yes	up
ENSSSCG00000004737	PLA2G4B	154.667	660.333	1.38	5.73	2.05387	1.86e-44	6.97e-44	yes	up
ENSSSCG00000004745	RPAP1	508	1800	3.98333	13.9533	1.80856	2.09e-112	1.79e-111	yes	up
ENSSSCG00000004746	ITPKA	19	4.33333	0.583333	0.133333	-2.12928	5.57e-06	9.27e-06	yes	down
ENSSSCG00000004747	RTF1	1381.33	655	9.04667	3.99	-1.181	2.66e-38	9.11e-38	yes	down
ENSSSCG00000004750	OIP5	72.4133	19.4567	0.993333	0.246667	-2.00972	7.79e-15	1.71e-14	yes	down
ENSSSCG00000004751	CHP1	3481	1399.67	52.1833	19.5833	-1.41396	1.39e-118	1.29e-117	yes	down
ENSSSCG00000004752	EXD1	35.6667	5.66667	0.56	0.0766667	-2.86876	3.62e-15	8.01e-15	yes	down
ENSSSCG00000004753	INO80	593	1427.67	3.84	8.56333	1.15707	1.68e-54	7.25e-54	yes	up
ENSSSCG00000004755	DLL4	1.33333	25.3333	0.01	0.17	4.08746	5.12e-15	1.13e-14	yes	up
ENSSSCG00000004757	VPS18	1097.33	6363	7.76	41.5933	2.42222	7.83e-284	3.21e-282	yes	up
ENSSSCG00000004759	SPINT1	5.33333	38.3333	0.08	0.563333	2.81592	1.83e-14	3.97e-14	yes	up
ENSSSCG00000004761	ZFYVE19	135.48	471.9	0.986667	3.23333	1.71239	1.22e-48	4.89e-48	yes	up
ENSSSCG00000004762	DNAJC17	159.29	519.29	5.64667	18.8233	1.73705	1.39e-51	5.78e-51	yes	up
ENSSSCG00000004765	RMDN3	224	502.667	3.82	7.95667	1.05859	4.35e-30	1.3e-29	yes	up
ENSSSCG00000004774	IVD	519	230.667	5.94	2.46333	-1.26985	1.36e-40	4.81e-40	yes	down
ENSSSCG00000004776	DISP2	13.0533	35.3333	0.13	0.32	1.29956	5.15e-06	8.59e-06	yes	up
ENSSSCG00000004781	-	4.33333	102.333	0.0433333	1.01	4.54273	2.49e-50	1.02e-49	yes	up
ENSSSCG00000004782	BUB1B	324.333	36.3333	3.72333	0.363333	-3.35723	1.55e-97	1.13e-96	yes	down
ENSSSCG00000004785	SRP14	2838.27	1112.75	34.3133	12.5	-1.45684	4.04e-106	3.26e-105	yes	down
ENSSSCG00000004787	GPR176	260	140	5.37333	2.49333	-1.10774	1.66e-16	3.79e-16	yes	down
ENSSSCG00000004789	THBS1	518616	239822	3602.89	1568.97	-1.19934	9.01e-61	4.23e-60	yes	down
ENSSSCG00000004803	ACTC1	0	3	0.001	0.0666667	6.05889	0.00590326	0.00837444	yes	up
ENSSSCG00000004806	-	357	73.6667	3.05667	0.583333	-2.38957	6.11e-68	3.16e-67	yes	down
ENSSSCG00000004807	SCG5	519.333	39.6667	9.80667	0.7	-3.80834	9.84e-170	1.49e-168	yes	down
ENSSSCG00000004813	-	277.333	44.6667	4.57333	0.616667	-2.89068	4.53e-79	2.68e-78	yes	down
ENSSSCG00000004814	-	1801	805.667	29.21	13.66	-1.0965	7.75e-55	3.37e-54	yes	down
ENSSSCG00000004822	ALDH1A3	15	114.667	0.156667	1	2.67423	4.69e-41	1.67e-40	yes	up
ENSSSCG00000004823	LRRK1	848.333	2114.33	4.63	10.52	1.18405	4.77e-74	2.65e-73	yes	up
ENSSSCG00000004829	CACHD1	95	226.667	0.733333	1.63667	1.15822	8.55e-18	2e-17	yes	up
ENSSSCG00000004834	NDN	831.667	1929	20.21	43.6067	1.10948	2.3e-62	1.1e-61	yes	up
ENSSSCG00000004835	MAGEL2	504	117.333	4.69333	1.02667	-2.19265	1.26e-71	6.83e-71	yes	down
ENSSSCG00000004836	-	1.66667	6.66667	0.0533333	0.18	1.75489	0.0222606	0.0301341	yes	up
ENSSSCG00000004839	-	0	109	0.001	1.27	10.3106	2.61e-57	1.17e-56	yes	up
ENSSSCG00000004840	OTUD7A	68.6667	483.333	0.99	6.47667	2.70975	4.69e-106	3.78e-105	yes	up
ENSSSCG00000004849	APBA2	0.666667	42	0.00666667	0.443333	6.05528	3.02e-26	8.44e-26	yes	up
ENSSSCG00000004850	-	45.6667	23.3333	1.28333	0.616667	-1.05733	4.75e-06	7.94e-06	yes	down
ENSSSCG00000004856	NFATC1	24.6667	279	0.26	2.81333	3.4357	3.06e-75	1.73e-74	yes	up
ENSSSCG00000004858	SALL3	0	27	0.001	0.263333	8.04075	8.09e-18	1.89e-17	yes	up
ENSSSCG00000004859	ZNF516	985.667	2115.67	5.44	17.2867	1.66798	5.81e-57	2.6e-56	yes	up
ENSSSCG00000004870	CNDP2	5880	13185.7	92.7333	193.733	1.06291	2.51e-74	1.4e-73	yes	up
ENSSSCG00000004875	CYB5A	1759.67	260	48.4467	9.50333	-2.34989	5.01e-201	1.04e-199	yes	down
ENSSSCG00000004884	TMX3	1630.33	252.333	10.2233	1.48333	-2.78495	1.19e-158	1.62e-157	yes	down
ENSSSCG00000004891	SERPINB7	20.3367	5.91667	0.18	0.05	-1.848	1.32e-06	2.25e-06	yes	down
ENSSSCG00000004893	VPS4B	1238.33	423	25.72	8.15	-1.65802	1.25e-59	5.77e-59	yes	down
ENSSSCG00000004896	PHLPP1	168	528	1.03333	3.08333	1.57719	3.49e-48	1.39e-47	yes	up
ENSSSCG00000004899	-	931	399.667	6.66333	2.73667	-1.28382	7.78e-48	3.08e-47	yes	down
ENSSSCG00000004901	PIGN	302.667	80	2.37667	0.593333	-2.00202	1.16e-46	4.52e-46	yes	down
ENSSSCG00000004903	CDH20	1	10	0.01	0.113333	3.5025	1.13e-05	1.86e-05	yes	up
ENSSSCG00000004908	LMAN1	3227.33	445.667	26.85	3.48333	-2.94638	0	0	yes	down
ENSSSCG00000004910	RAX	0	2.33333	0.001	0.0833333	6.38082	0.0261756	0.0352194	yes	up
ENSSSCG00000004918	ALPK2	254.667	46	1.42	0.246667	-2.52526	1.14e-72	6.25e-72	yes	down
ENSSSCG00000004923	SLC51B	24.4733	1.73333	0.34	0.02	-4.08746	1.48e-14	3.22e-14	yes	down
ENSSSCG00000004926	PDCD7	66.6667	273	1.90667	7.25333	1.92759	3.66e-49	1.48e-48	yes	up
ENSSSCG00000004927	CLPX	1123	454.667	12.0133	4.55667	-1.39859	3.23e-61	1.53e-60	yes	down
ENSSSCG00000004928	CILP	5	31	0.0466667	0.253333	2.44057	8.04e-10	1.54e-09	yes	up
ENSSSCG00000004929	PARP16	467.333	1750.33	6.9	23.7833	1.78528	3.09e-137	3.48e-136	yes	up
ENSSSCG00000004931	IGDCC4	303	137.667	2.71333	1.23	-1.14141	4.92e-21	1.24e-20	yes	down
ENSSSCG00000004932	IGDCC3	0.333333	28.6667	0.00333333	0.413333	6.9542	3.45e-21	8.75e-21	yes	up
ENSSSCG00000004934	DPP8	1326.33	631.333	7.31333	3.29667	-1.14952	5.61e-42	2.03e-41	yes	down
ENSSSCG00000004938	DENND4A	635	161.667	3.10667	0.74	-2.06977	2.31e-84	1.47e-83	yes	down
ENSSSCG00000004939	MEGF11	0.333333	24.6667	0.00333333	0.273333	6.35755	1.29e-16	2.96e-16	yes	up
ENSSSCG00000004943	MAP2K1	889.393	242.923	13.9867	3.58333	-1.96468	2.1e-86	1.37e-85	yes	down
ENSSSCG00000004946	ZWILCH	229.667	96.6667	3.55	1.46	-1.28185	2.03e-24	5.46e-24	yes	down
ENSSSCG00000004948	SMAD6	778.333	223.333	21.5267	5.63667	-1.93321	5.83e-47	2.27e-46	yes	down
ENSSSCG00000004952	SMAD3	1368	10767.3	9.44333	68.65	2.86189	0	0	yes	up
ENSSSCG00000004954	-	91.6667	365.667	5.39667	19.8733	1.88069	1.22e-54	5.29e-54	yes	up
ENSSSCG00000004956	SKOR1	1.66667	16.6667	0.0233333	0.22	3.23704	5.3e-09	9.88e-09	yes	up
ENSSSCG00000004957	CLN6	1004.33	4045.67	19.03	71.1067	1.90171	3.53e-152	4.54e-151	yes	up
ENSSSCG00000004958	PIAS1	611.41	200.337	7.15333	2.35333	-1.60391	1.2e-42	4.4e-42	yes	down
ENSSSCG00000004961	ITGA11	9369.67	2703.67	81.3833	24.1933	-1.75012	6.62e-229	1.71e-227	yes	down
ENSSSCG00000004968	PAQR5	2.66667	12.3333	0.09	0.396667	2.13993	0.000687974	0.00103707	yes	up
ENSSSCG00000004969	KIF23	410	168.333	3.1	1.16	-1.41814	9.21e-28	2.64e-27	yes	down
ENSSSCG00000004971	TLE3	209	3370.67	1.79667	30.5567	4.08809	0	0	yes	up
ENSSSCG00000004973	UACA	767.333	156.333	6.9	1.29667	-2.41179	1.49e-115	1.33e-114	yes	down
ENSSSCG00000004974	LARP6	397.333	1141.77	6.38333	15.6	1.28916	4.09e-68	2.12e-67	yes	up
ENSSSCG00000004976	-	62	16.3333	0.896667	0.22	-2.02707	3.72e-16	8.42e-16	yes	down
ENSSSCG00000004980	THSD4	3440.33	953.667	27.4967	7.27333	-1.91857	6.54e-104	5.15e-103	yes	down
ENSSSCG00000004986	TRAPPC6B	549	106	11.7367	2.13333	-2.45984	4.26e-68	2.21e-67	yes	down
ENSSSCG00000004990	LRFN5	123	39.6667	1.64333	0.376667	-2.12526	4.71e-22	1.21e-21	yes	down
ENSSSCG00000004996	KLHL28	534	127	5.67333	1.96667	-1.52844	1.97e-70	1.05e-69	yes	down
ENSSSCG00000004997	PRPF39	564	148	7.15667	1.73333	-2.04574	9.31e-84	5.85e-83	yes	down
ENSSSCG00000004999	MIS18BP1	205.967	47.3333	1.29	0.28	-2.20387	1.26e-34	4.07e-34	yes	down
ENSSSCG00000005000	FANCM	77.0333	26.3333	0.483333	0.16	-1.59495	1.73e-15	3.85e-15	yes	down
ENSSSCG00000005008	POLE2	32.9667	8.09333	0.81	0.166667	-2.28096	4.14e-06	6.94e-06	yes	down
ENSSSCG00000005011	NEMF	548.137	219.743	6.24333	2.33	-1.42199	5.09e-38	1.73e-37	yes	down
ENSSSCG00000005012	ARF6	3900.67	11396.7	91.0233	317.7	1.80336	1.19e-147	1.48e-146	yes	up
ENSSSCG00000005022	NIN	1962.67	282.333	11.2067	1.60667	-2.80221	6.25e-162	8.77e-161	yes	down
ENSSSCG00000005023	-	102.333	13	2.93	0.353333	-3.0518	8.12e-38	2.76e-37	yes	down
ENSSSCG00000005025	TRIM9	91	277	0.833333	2.42667	1.54201	5.23e-21	1.32e-20	yes	up
ENSSSCG00000005029	RTRAF	2036	997.333	81.86	37.0267	-1.14459	5.31e-48	2.11e-47	yes	down
ENSSSCG00000005030	NID2	14185.3	1063	111.807	7.99667	-3.80546	0	0	yes	down
ENSSSCG00000005037	ERO1A	1471.67	124	11.3667	1.06667	-3.41363	2.39e-257	7.8e-256	yes	down
ENSSSCG00000005038	PSMC6	2044.58	969.93	40.9433	16.8133	-1.28402	5.68e-63	2.74e-62	yes	down
ENSSSCG00000005039	STYX	510.09	220.07	4.60667	1.85667	-1.31101	5.89e-36	1.94e-35	yes	down
ENSSSCG00000005040	-	493.333	88	9.39333	1.58667	-2.56564	5.87e-71	3.15e-70	yes	down
ENSSSCG00000005041	FERMT2	6988.33	2209.33	83.0667	24.6233	-1.75424	1.17e-143	1.4e-142	yes	down
ENSSSCG00000005045	BMP4	766.333	1687	10.1167	20.48	1.01748	1.25e-40	4.44e-40	yes	up
ENSSSCG00000005052	WDHD1	142	45	1.39667	0.416667	-1.74502	7.94e-20	1.95e-19	yes	down
ENSSSCG00000005056	DLGAP5	339.667	168.333	1.92	0.883333	-1.12008	8.6e-25	2.33e-24	yes	down
ENSSSCG00000005060	KTN1	3363	801	30.2833	6.79667	-2.15562	1.83e-168	2.73e-167	yes	down
ENSSSCG00000005062	TMEM260	475	144.333	5.45667	1.53667	-1.82822	1.42e-56	6.3e-56	yes	down
ENSSSCG00000005066	EXOC5	2297.33	437.333	21.2167	3.75333	-2.49895	6.82e-177	1.1e-175	yes	down
ENSSSCG00000005072	PSMA3	1910.67	836.667	26.5	10.7467	-1.3021	1.42e-61	6.73e-61	yes	down
ENSSSCG00000005073	ARID4A	302	52	2.11	0.336667	-2.64785	8.83e-61	4.15e-60	yes	down
ENSSSCG00000005075	TOMM20L	4.33333	0.666667	0.376667	0.05	-2.91329	0.0215898	0.0292658	yes	down
ENSSSCG00000005076	KIAA0586	198.667	62.3333	1.65333	0.49	-1.75452	1.16e-34	3.74e-34	yes	down
ENSSSCG00000005078	DAAM1	1593.33	236.333	11.2733	1.97667	-2.51177	4.41e-239	1.25e-237	yes	down
ENSSSCG00000005082	PCNX4	289.74	136.233	1.97	0.886667	-1.15173	8.98e-21	2.26e-20	yes	down
ENSSSCG00000005083	DHRS7	317.26	732.1	3.24	7	1.11136	5.3e-37	1.78e-36	yes	up
ENSSSCG00000005087	SIX1	4	204.667	0.06	2.8	5.54432	1.11e-82	6.87e-82	yes	up
ENSSSCG00000005094	TMEM30B	1.33333	14.6667	0.05	0.53	3.40599	2.3e-08	4.2e-08	yes	up
ENSSSCG00000005095	PRKCH	22	128.667	0.146667	0.8	2.44746	2.78e-30	8.34e-30	yes	up
ENSSSCG00000005096	HIF1A	15876.5	3124.33	170.89	31.63	-2.4337	2.71e-188	4.95e-187	yes	down
ENSSSCG00000005098	SYT16	37	14.3333	0.546667	0.196667	-1.47491	2.8e-07	4.9e-07	yes	down
ENSSSCG00000005102	AEN	1718.67	30615.7	24.9433	413.13	4.04987	0	0	yes	up
ENSSSCG00000005103	DET1	491.667	1863.33	8.98333	32.08	1.83635	7.37e-150	9.29e-149	yes	up
ENSSSCG00000005106	NTRK3	15	288.333	0.32	5.93667	4.21351	3.9e-106	3.15e-105	yes	up
ENSSSCG00000005109	ESR2	26	3	0.48	0.0533333	-3.16993	1.56e-13	3.3e-13	yes	down
ENSSSCG00000005110	SYNE2	724.667	167.667	1.39667	0.303333	-2.20301	9.22e-105	7.34e-104	yes	down
ENSSSCG00000005124	IFT74	107	18.3333	1.67333	0.323333	-2.37163	7.62e-30	2.27e-29	yes	down
ENSSSCG00000005126	PLAA	1388.67	639.333	20.6467	8.76333	-1.23636	2.74e-60	1.28e-59	yes	down
ENSSSCG00000005128	-	32.6667	139.333	2.06667	8.34333	2.01332	4.96e-28	1.43e-27	yes	up
ENSSSCG00000005134	P14ARF	27	92	1.89333	6.48	1.77507	5.44e-14	1.16e-13	yes	up
ENSSSCG00000005135	MTAP	1158.67	495.667	19.32	7.80333	-1.30793	5.26e-40	1.85e-39	yes	down
ENSSSCG00000005136	IFNE	4	1	0.293333	0.07	-2.06711	0.0364678	0.0484493	yes	down
ENSSSCG00000005152	IFN-DELTA-1	2.33333	0	0.0933333	0.001	-6.54432	0.0164584	0.0225699	yes	down
ENSSSCG00000005164	HACD4	2704.33	175.333	46.45	2.77	-4.06772	0	0	yes	down
ENSSSCG00000005166	MLLT3	314	60.3333	6.89333	1.34	-2.36297	1.26e-63	6.15e-63	yes	down
ENSSSCG00000005167	SLC24A2	0	2.33333	0.001	0.0133333	3.73697	0.0212642	0.0288428	yes	up
ENSSSCG00000005173	HAUS6	404	188.667	2.28333	0.993333	-1.20079	6.96e-32	2.15e-31	yes	down
ENSSSCG00000005177	SH3GL2	114.333	541.667	1.60333	7.08667	2.14403	1.7e-74	9.5e-74	yes	up
ENSSSCG00000005178	CNTLN	110.667	39.6667	0.876667	0.316667	-1.46906	1.2e-15	2.69e-15	yes	down
ENSSSCG00000005182	-	11.3333	1.33333	0.0833333	0.01	-3.05889	1.81e-06	3.07e-06	yes	down
ENSSSCG00000005183	PSIP1	769.353	180.167	11.9567	2.65333	-2.17194	3.18e-80	1.92e-79	yes	down
ENSSSCG00000005190	NFIB	2.33333	76.6667	0.0633333	1.09667	4.11402	4.78e-42	1.73e-41	yes	up
ENSSSCG00000005193	TYRP1	21.3333	0.666667	0.226667	0.00666667	-5.08746	3.31e-12	6.76e-12	yes	down
ENSSSCG00000005205	-	507	158.667	2.98	0.863333	-1.78732	8.08e-57	3.6e-56	yes	down
ENSSSCG00000005207	ERMP1	580.95	225.23	3.76	1.39667	-1.42874	6.95e-31	2.1e-30	yes	down
ENSSSCG00000005211	CD274	26	9.33333	0.26	0.09	-1.53051	2.72e-06	4.58e-06	yes	down
ENSSSCG00000005212	PLGRKT	427.667	205.333	20.7633	9.17	-1.17904	9.5e-32	2.92e-31	yes	down
ENSSSCG00000005215	JAK2	504.333	127	4.31	0.963333	-2.16158	1.53e-56	6.78e-56	yes	down
ENSSSCG00000005217	RCL1	386	1049.67	6.39333	16.1867	1.34017	1.38e-63	6.72e-63	yes	up
ENSSSCG00000005219	CDC37L1	505.74	193.077	4.54	1.92	-1.24159	7.45e-38	2.53e-37	yes	down
ENSSSCG00000005222	SLC1A1	767.333	51	7.13	0.443333	-4.00744	4.18e-217	9.93e-216	yes	down
ENSSSCG00000005224	GLIS3	117.667	258	0.923333	1.9	1.04108	1.33e-16	3.04e-16	yes	up
ENSSSCG00000005229	VLDLR	9226.33	844.667	116.927	9.98667	-3.54946	0	0	yes	down
ENSSSCG00000005233	DMRT2	0	3.66667	0.001	0.06	5.90689	0.00150994	0.00223012	yes	up
ENSSSCG00000005235	KANK1	2082	1048.33	16.06	7.6	-1.0794	8.9e-66	4.48e-65	yes	down
ENSSSCG00000005240	DOCK8	5.66667	16.3333	0.0266667	0.0833333	1.64386	0.000989183	0.00147576	yes	up
ENSSSCG00000005243	PGM5	0	6	0.001	0.0966667	6.59495	4.71e-05	7.54e-05	yes	up
ENSSSCG00000005250	APBA1	137.667	487	0.856667	2.81667	1.71718	1.13e-56	5.02e-56	yes	up
ENSSSCG00000005255	SMC5	479.333	163.333	3.66	1.22333	-1.58103	1.3e-31	3.99e-31	yes	down
ENSSSCG00000005267	ANXA1	8512	3899.33	167.2	74.8133	-1.16021	4.38e-63	2.11e-62	yes	down
ENSSSCG00000005269	TRPM6	18	46.6667	0.116667	0.29	1.31366	1.06e-05	1.75e-05	yes	up
ENSSSCG00000005271	CARNMT1	1094.67	232	10.8733	2.16333	-2.32947	4.82e-131	5.09e-130	yes	down
ENSSSCG00000005272	NMRK1	115.333	28.6667	3.13333	0.7	-2.16227	7.41e-14	1.58e-13	yes	down
ENSSSCG00000005273	OSTF1	1382.33	256	36.12	6.85667	-2.39722	1.78e-160	2.46e-159	yes	down
ENSSSCG00000005277	GCNT1	2429.67	398	37.87	5.84	-2.69702	1.34e-249	4.15e-248	yes	down
ENSSSCG00000005278	-	1714.67	413.667	15.28	3.48333	-2.1331	1.03e-104	8.19e-104	yes	down
ENSSSCG00000005279	FOXB2	0	3	0.001	0.09	6.49185	0.00563416	0.00801213	yes	up
ENSSSCG00000005282	-	527	152.333	2.64	0.713333	-1.88789	1.53e-62	7.35e-62	yes	down
ENSSSCG00000005287	PSAT1	2674	182	104.45	6.65333	-3.97259	0	0	yes	down
ENSSSCG00000005291	TLE1	1850.67	4286.33	23.8133	51.9133	1.12434	3.63e-79	2.16e-78	yes	up
ENSSSCG00000005296	PHF24	12.3333	87.3333	0.09	0.596667	2.72893	2.74e-29	8.05e-29	yes	up
ENSSSCG00000005301	FAM214B	1048.67	444	14.04	5.49333	-1.35379	1.31e-65	6.56e-65	yes	down
ENSSSCG00000005303	PIGO	617.907	1310.8	5.89	12.2567	1.05723	6.32e-43	2.32e-42	yes	up
ENSSSCG00000005310	TESK1	1182.67	3275.33	19.6167	50.2933	1.35829	5.78e-99	4.31e-98	yes	up
ENSSSCG00000005315	CA9	32.3333	73	0.91	1.90667	1.06711	4.19e-08	7.56e-08	yes	up
ENSSSCG00000005316	TPM2	91857.7	26278.3	2110.86	562.637	-1.90756	4.81e-201	9.98e-200	yes	down
ENSSSCG00000005324	-	36.3333	92	0.69	1.59667	1.21039	1.97e-10	3.84e-10	yes	up
ENSSSCG00000005325	TMEM8B	155.667	505.667	2.19	6.55	1.58056	7.6e-57	3.39e-56	yes	up
ENSSSCG00000005338	RECK	850.333	122	9.18667	1.32	-2.799	4.2e-134	4.56e-133	yes	down
ENSSSCG00000005340	CCIN	0.333333	14.3333	0.00666667	0.303333	5.50779	6.85e-09	1.27e-08	yes	up
ENSSSCG00000005344	MELK	144	41.6667	2.32	0.623333	-1.89605	2.52e-23	6.64e-23	yes	down
ENSSSCG00000005347	POLR1E	473.333	1804.33	7.05667	24.9433	1.8216	3.11e-139	3.56e-138	yes	up
ENSSSCG00000005349	GRHPR	1058	3381.33	33.0967	98.6433	1.57554	8e-122	7.71e-121	yes	up
ENSSSCG00000005350	FBXO10	121.333	954.333	1.09667	8.00667	2.86808	1.82e-195	3.55e-194	yes	up
ENSSSCG00000005355	EXOSC3	122.277	466.313	3.51333	12.2967	1.80735	6.75e-44	2.51e-43	yes	up
ENSSSCG00000005360	IGFBPL1	1	4.66667	0.00666667	0.0433333	2.70044	0.0334796	0.0445913	yes	up
ENSSSCG00000005369	FOXE1	2.66667	172.667	0.0966667	5.82667	5.91351	4.21e-102	3.26e-101	yes	up
ENSSSCG00000005370	TRMO	128.333	395.667	2.94	8.6	1.54852	2.4e-44	9e-44	yes	up
ENSSSCG00000005371	HEMGN	44.3333	19	0.62	0.246667	-1.32971	5.74e-05	9.16e-05	yes	down
ENSSSCG00000005375	CORO2A	37	181.333	0.33	1.52333	2.20669	1.51e-43	5.6e-43	yes	up
ENSSSCG00000005376	TBC1D2	104.333	282.667	1.60667	4.05	1.33385	1.43e-30	4.3e-30	yes	up
ENSSSCG00000005378	-	215.333	493.333	2.70333	5.79333	1.09965	2.47e-28	7.15e-28	yes	up
ENSSSCG00000005380	COL15A1	39699.7	2856.67	343.187	24.46	-3.8105	0	0	yes	down
ENSSSCG00000005382	TGFBR1	2530.33	572.667	22.3	6.74667	-1.7248	4.12e-131	4.35e-130	yes	down
ENSSSCG00000005385	NR4A3	93.6667	304.667	0.496667	2.78	2.48474	7.49e-26	2.07e-25	yes	up
ENSSSCG00000005386	STX17	365.667	70.3333	4.40333	0.79	-2.47867	1.52e-78	8.94e-78	yes	down
ENSSSCG00000005388	INVS	1222.9	568.643	11.1667	5.22333	-1.09616	1.5e-50	6.18e-50	yes	down
ENSSSCG00000005399	RNF20	636	274	6.26	2.53	-1.30703	8.83e-42	3.18e-41	yes	down
ENSSSCG00000005400	GRIN3A	7.33333	66	0.04	0.513333	3.68182	7.84e-22	2.02e-21	yes	up
ENSSSCG00000005403	SMC2	798.333	123	6.24667	0.91	-2.77915	7.58e-136	8.41e-135	yes	down
ENSSSCG00000005423	ABCA1	221	5130.33	1.32333	28.6833	4.43796	0	0	yes	up
ENSSSCG00000005424	NIPSNAP3B	1692	300.667	37.3433	6.18333	-2.59439	7.26e-143	8.6e-142	yes	down
ENSSSCG00000005427	FKTN	552.333	104	5.06	0.843333	-2.58496	9.85e-108	8.1e-107	yes	down
ENSSSCG00000005437	KLF4	948	3578.33	12.3367	43.36	1.81341	2.42e-83	1.51e-82	yes	up
ENSSSCG00000005452	-	0	4.33333	0.001	0.06	5.90689	0.000787705	0.00118288	yes	up
ENSSSCG00000005455	SVEP1	5245.33	2430.67	19.8567	8.55667	-1.2145	3.33e-78	1.95e-77	yes	down
ENSSSCG00000005460	DNAJC25	478.667	97.3333	13.9367	2.65667	-2.3912	1.67e-94	1.19e-93	yes	down
ENSSSCG00000005465	SUSD1	744.667	140.667	13.6467	2.40667	-2.50344	9.49e-119	8.82e-118	yes	down
ENSSSCG00000005466	PTBP3	3407.33	589	20.09	3.22	-2.64134	5.29e-209	1.16e-207	yes	down
ENSSSCG00000005467	HSDL2	1332	291	23.58	4.77333	-2.30449	1.2e-169	1.81e-168	yes	down
ENSSSCG00000005474	SAL1	33.6667	4.66667	1.47333	0.18	-3.03302	1.04e-15	2.33e-15	yes	down
ENSSSCG00000005475	ZFP37	43	11.3333	0.62	0.14	-2.14684	3.62e-11	7.18e-11	yes	down
ENSSSCG00000005479	-	0.333333	4.33333	0.01	0.11	3.45943	0.0159102	0.0218446	yes	up
ENSSSCG00000005485	AMBP	0.666667	11.3333	0.0266667	0.41	3.94251	2.52e-07	4.43e-07	yes	up
ENSSSCG00000005486	KIF12	407	1134.33	7.26667	18.6067	1.35645	1.22e-55	5.36e-55	yes	up
ENSSSCG00000005487	COL27A1	177.667	684.333	1.13667	4.09667	1.84964	1.07e-66	5.44e-66	yes	up
ENSSSCG00000005490	WHRN	586.667	255.333	4.81	1.95667	-1.29764	4.81e-34	1.53e-33	yes	down
ENSSSCG00000005501	TRIM32	664	2776	8.55667	33.1933	1.95577	4e-213	9.17e-212	yes	up
ENSSSCG00000005502	ASTN2	21.6667	127	0.123333	0.663333	2.42717	2.07e-30	6.19e-30	yes	up
ENSSSCG00000005504	BRINP1	0.333333	3.66667	0.00333333	0.0333333	3.32193	0.0309263	0.0413628	yes	up
ENSSSCG00000005508	-	329.667	172	14.2867	6.85667	-1.05909	5.41e-19	1.3e-18	yes	down
ENSSSCG00000005511	TRAF1	141.003	402	1.42	3.75333	1.40228	1.96e-28	5.69e-28	yes	up
ENSSSCG00000005530	LHX6	0	22	0.001	0.783333	9.61348	4.21e-17	9.73e-17	yes	up
ENSSSCG00000005532	MRRF	502	1096.33	11.7333	24.13	1.04021	5.07e-31	1.54e-30	yes	up
ENSSSCG00000005533	PTGS1	444.333	208.333	3.90667	1.7	-1.2004	3.91e-32	1.21e-31	yes	down
ENSSSCG00000005582	STRBP	911.667	231.667	14.0333	3.16333	-2.14934	1.35e-96	9.81e-96	yes	down
ENSSSCG00000005585	DENND1A	814.39	1853.78	6.65667	16.0667	1.2712	1.81e-56	8.03e-56	yes	up
ENSSSCG00000005586	LHX2	0.666667	38.3333	0.0166667	0.816667	5.61471	3.79e-20	9.39e-20	yes	up
ENSSSCG00000005588	NR5A1	740	2159	8.07667	21.8867	1.43822	2.8e-100	2.13e-99	yes	up
ENSSSCG00000005591	ADGRD2	0.333333	8.66667	0.00333333	0.126667	5.24793	1.52e-05	2.48e-05	yes	up
ENSSSCG00000005596	ARPC5L	1099.67	2995.67	27.1933	69.8267	1.36053	2.31e-96	1.67e-95	yes	up
ENSSSCG00000005597	GOLGA1	1002.33	494.333	7.72	3.57	-1.11268	9.22e-38	3.13e-37	yes	down
ENSSSCG00000005604	PBX3	647.333	245.333	9.82	3.58	-1.45576	4.04e-55	1.76e-54	yes	down
ENSSSCG00000005610	SLC2A8	201.667	1799.67	4.13667	34.2133	3.04802	5.6e-268	2.01e-266	yes	up
ENSSSCG00000005611	ZNF79	41.2633	126.823	0.826667	2.31	1.48252	6.24e-15	1.37e-14	yes	up
ENSSSCG00000005613	LRSAM1	334.37	1857.02	4.50333	23.17	2.36319	8.78e-221	2.13e-219	yes	up
ENSSSCG00000005614	FAM129B	8328.33	21856	86.0933	210.33	1.28868	9.61e-135	1.05e-133	yes	up
ENSSSCG00000005616	-	12	38.6667	0.2	0.64	1.67807	5.63e-08	1.01e-07	yes	up
ENSSSCG00000005620	SH2D3C	10	45	0.163333	0.613333	1.90885	3.27e-11	6.49e-11	yes	up
ENSSSCG00000005621	CDK9	1817	8214	38.6267	161.9	2.06743	1.03e-259	3.44e-258	yes	up
ENSSSCG00000005626	FPGS	282.06	772.22	5.08	12.96	1.35117	9.58e-50	3.9e-49	yes	up
ENSSSCG00000005627	AK1	171.333	33.3333	7.38667	1.36333	-2.43779	9.88e-43	3.62e-42	yes	down
ENSSSCG00000005629	PIP5KL1	0.666667	6	0.0233333	0.193333	3.05063	0.0033147	0.00478273	yes	up
ENSSSCG00000005630	NAIF1	6.33333	43.6667	0.29	1.85	2.6734	6.94e-16	1.56e-15	yes	up
ENSSSCG00000005631	-	743.333	7647	6.47	64.1167	3.30886	0	0	yes	up
ENSSSCG00000005636	SLC25A25	1015.33	4661.33	13.06	60.59	2.21392	3.77e-115	3.35e-114	yes	up
ENSSSCG00000005638	-	181.68	906.15	2.43333	11.35	2.22169	1.01e-106	8.26e-106	yes	up
ENSSSCG00000005641	DNM1	77.6667	188.667	1.22667	2.82333	1.20266	4.03e-16	9.13e-16	yes	up
ENSSSCG00000005645	TRUB2	508.473	1581.98	13.2667	39.36	1.56892	8.55e-110	7.17e-109	yes	up
ENSSSCG00000005649	URM1	1209.67	2760.67	24.0967	53.2167	1.14304	1.51e-72	8.23e-72	yes	up
ENSSSCG00000005650	CERCAM	2805.67	1345	44.11	19.6267	-1.16829	1.29e-75	7.33e-75	yes	down
ENSSSCG00000005652	GLE1	625	2738.67	7	28.61	2.03109	8.02e-193	1.53e-191	yes	up
ENSSSCG00000005654	SPTAN1	4515.14	39343.1	21.2233	171.327	3.01303	0	0	yes	up
ENSSSCG00000005655	WDR34	444.53	97.2167	9.41333	1.92667	-2.2886	1.25e-52	5.28e-52	yes	down
ENSSSCG00000005660	TBC1D13	918.333	3657.33	11.6	54.4433	2.23063	3.26e-207	7.05e-206	yes	up
ENSSSCG00000005661	ENDOG	59.01	206.92	2.33333	7.7	1.72247	4.02e-34	1.28e-33	yes	up
ENSSSCG00000005662	SPOUT1	239.323	788.747	2.16667	6.66	1.62004	1.77e-76	1.02e-75	yes	up
ENSSSCG00000005663	KYAT1	94.3333	307	1.86	5.79333	1.63909	4.21e-32	1.31e-31	yes	up
ENSSSCG00000005664	LRRC8A	2899.39	8230.77	27.6333	73.1133	1.40372	3.28e-132	3.49e-131	yes	up
ENSSSCG00000005665	-	52.94	266.233	0.673333	2.94333	2.12806	0.000263926	0.000406673	yes	up
ENSSSCG00000005666	DOLK	419.333	1031.33	10.6233	24.2033	1.18797	1.11e-48	4.44e-48	yes	up
ENSSSCG00000005667	NUP188	1809.67	6066	12.4633	38.1167	1.61273	2.76e-126	2.77e-125	yes	up
ENSSSCG00000005668	SH3GLB2	981.667	2393.33	19.9833	45.17	1.17657	8.14e-54	3.48e-53	yes	up
ENSSSCG00000005669	MIGA2	222.333	913.333	5.12	19.5667	1.93418	3.29e-98	2.44e-97	yes	up
ENSSSCG00000005678	NTMT1	221.333	2518	13.5533	142.877	3.39805	0	0	yes	up
ENSSSCG00000005679	ASB6	1329.33	4847.33	18.2933	61.8267	1.75691	1.62e-161	2.27e-160	yes	up
ENSSSCG00000005680	PRRX2	1678	667.333	89.6067	32.7933	-1.4502	1.45e-69	7.65e-69	yes	down
ENSSSCG00000005683	TOR1B	93.3333	319.667	3.80667	12.2567	1.68697	7.23e-34	2.3e-33	yes	up
ENSSSCG00000005688	PTGES	690.333	4918.33	24.3133	160.293	2.72089	1.23e-281	4.92e-280	yes	up
ENSSSCG00000005699	HMCN2	2.33333	11	0.00666667	0.0266667	2	0.00138985	0.00205723	yes	up
ENSSSCG00000005703	PRDM12	0.666667	139.333	0.0266667	4.80333	7.49285	1.22e-87	8.05e-87	yes	up
ENSSSCG00000005704	EXOSC2	256.333	2563.33	7.54	70.06	3.21595	0	0	yes	up
ENSSSCG00000005706	ABL1	4360.33	9402.33	30.97	63.1567	1.02806	1.73e-67	8.89e-67	yes	up
ENSSSCG00000005710	LAMC3	20	342.667	0.173333	2.76667	3.99653	1.3e-125	1.3e-124	yes	up
ENSSSCG00000005711	NUP214	1816.33	4839.67	11.0567	27.1367	1.29533	4.07e-69	2.14e-68	yes	up
ENSSSCG00000005715	PRRC2B	4452	14049.3	21.73	63.72	1.55206	3.68e-136	4.09e-135	yes	up
ENSSSCG00000005717	UCK1	1118.03	6922.34	12.5633	72.62	2.53115	0	0	yes	up
ENSSSCG00000005719	RAPGEF1	612.333	2081	7.66667	24.4767	1.67474	9.17e-103	7.17e-102	yes	up
ENSSSCG00000005720	MED27	419.667	2091.33	10.7933	51.65	2.25863	8.09e-165	1.17e-163	yes	up
ENSSSCG00000005723	NTNG2	84.3333	253.667	2.04	5.63667	1.46627	3.97e-25	1.08e-24	yes	up
ENSSSCG00000005727	-	0	2.19333	0.001	0.0233333	4.54432	0.0309682	0.0413797	yes	up
ENSSSCG00000005729	DDX31	365	1792.33	2.26333	10.3967	2.1996	1.79e-159	2.46e-158	yes	up
ENSSSCG00000005731	GTF3C4	591.667	1705.67	2.95333	7.9	1.41951	7.26e-90	4.94e-89	yes	up
ENSSSCG00000005743	VAV2	285.667	1816.33	2.48	15.2733	2.6226	1.46e-195	2.86e-194	yes	up
ENSSSCG00000005751	COL5A1	80618.3	10594	593.923	72.6567	-3.03111	0	0	yes	down
ENSSSCG00000005753	CAMSAP1	1618.33	7200	9.16333	37.9233	2.04914	1.61e-256	5.23e-255	yes	up
ENSSSCG00000005759	MRPS2	543.333	2530.33	17.1967	73.6033	2.09764	1.21e-104	9.63e-104	yes	up
ENSSSCG00000005761	PPP1R26	514	3880	4.42667	31.1033	2.81278	8.61e-252	2.68e-250	yes	up
ENSSSCG00000005762	KCNT1	0	9.33333	0.001	0.0866667	6.43741	5.67e-08	1.02e-07	yes	up
ENSSSCG00000005768	-	2447.89	1039.73	42.0333	16.6633	-1.33486	4.89e-98	3.61e-97	yes	down
ENSSSCG00000005773	RBFA	672.667	3317	9.02333	41.5367	2.20265	5.23e-253	1.64e-251	yes	up
ENSSSCG00000005777	TXNL4A	418	1036.67	18.2133	41.1933	1.17742	1.92e-52	8.07e-52	yes	up
ENSSSCG00000005778	HSBP1L1	220.667	85	5.46667	1.93667	-1.49709	1.08e-18	2.58e-18	yes	down
ENSSSCG00000005780	KCNG2	0.333333	3.33333	0.01	0.0866667	3.11548	0.0156507	0.0215093	yes	up
ENSSSCG00000005781	TARSL2	7.33333	120	0.0833333	1.18667	3.83188	1.75e-54	7.57e-54	yes	up
ENSSSCG00000005785	PCSK6	637	1367	6.06667	12.23	1.01145	5.19e-35	1.68e-34	yes	up
ENSSSCG00000005787	CTDP1	624.333	5620.67	6.84667	56.5933	3.04716	0	0	yes	up
ENSSSCG00000005828	EGFL7	582.91	170.037	17.9667	4.53333	-1.98668	2.93e-65	1.46e-64	yes	down
ENSSSCG00000005832	MAMDC4	964.427	2089.79	6.42	12.85	1.00112	4.39e-35	1.43e-34	yes	up
ENSSSCG00000005838	TRAF2	1506	12738.3	24.4733	191.563	2.96854	0	0	yes	up
ENSSSCG00000005839	FBXW5	725.627	1639.65	17.53	36.5367	1.05952	8.17e-37	2.73e-36	yes	up
ENSSSCG00000005841	RABL6	1332.33	3887.33	22.9233	61.3033	1.41915	2.03e-61	9.62e-61	yes	up
ENSSSCG00000005845	TOR4A	34.6667	146	0.903333	3.48	1.94576	1.01e-20	2.53e-20	yes	up
ENSSSCG00000005846	NELFB	1233.67	3264.33	20.3567	52.1033	1.35587	4.36e-67	2.24e-66	yes	up
ENSSSCG00000005859	NDOR1	338.333	735	6.01333	12.76	1.08539	3.33e-26	9.27e-26	yes	up
ENSSSCG00000005890	ZNF7	277.24	1507.83	4.59	23.3	2.34376	7.73e-182	1.31e-180	yes	up
ENSSSCG00000005893	-	10.54	0	0.253333	0.001	-7.98489	4.46e-06	7.45e-06	yes	down
ENSSSCG00000005894	ARHGAP39	157	1576.33	1.93333	18.0667	3.22417	6.08e-273	2.26e-271	yes	up
ENSSSCG00000005895	C8orf82	182.667	1284.33	11.3867	74.3967	2.70789	9.58e-188	1.74e-186	yes	up
ENSSSCG00000005896	LRRC24	169.58	934.557	1.24333	7.59333	2.61052	3.62e-127	3.68e-126	yes	up
ENSSSCG00000005899	MFSD3	223.987	1096.13	6.06667	27.3567	2.17292	4.81e-82	2.96e-81	yes	up
ENSSSCG00000005905	SLC39A4	31.3333	95.6667	0.403333	1.19333	1.56495	1e-14	2.19e-14	yes	up
ENSSSCG00000005906	CPSF1	1815.67	4694	17.2367	41.6067	1.27133	8.31e-97	6.04e-96	yes	up
ENSSSCG00000005908	-	712.333	2870	15.4467	57.2933	1.89107	8.14e-175	1.28e-173	yes	up
ENSSSCG00000005909	-	264.667	978.667	5.59333	19.1167	1.77305	4.61e-85	2.94e-84	yes	up
ENSSSCG00000005910	TMEM249	0.666667	8.66667	0.0333333	0.466667	3.80735	1.5e-05	2.45e-05	yes	up
ENSSSCG00000005911	OPLAH	345.333	1249.33	3.71667	12.35	1.73243	2.37e-58	1.08e-57	yes	up
ENSSSCG00000005914	SHARPIN	551.1	1656.37	5.09667	14.07	1.465	1.97e-52	8.28e-52	yes	up
ENSSSCG00000005915	MAF1	1740.24	5173.33	45.9433	126.44	1.46053	3.84e-119	3.58e-118	yes	up
ENSSSCG00000005916	WDR97	508.093	1712.67	3.41	10.6533	1.64346	9.47e-90	6.43e-89	yes	up
ENSSSCG00000005917	HSF1	941.44	2766.79	18.1533	48.5133	1.41815	3.39e-100	2.57e-99	yes	up
ENSSSCG00000005918	DGAT1	356.893	1141.87	5.21333	16.29	1.64371	7.04e-86	4.55e-85	yes	up
ENSSSCG00000005920	BOP1	1308.67	8537.67	17.8567	107.947	2.59578	2.46e-304	1.2e-302	yes	up
ENSSSCG00000005922	-	0	3.34	0.001	0.07	6.12928	0.00340412	0.00490841	yes	up
ENSSSCG00000005923	SPATC1	0	3.66667	0.001	0.11	6.78136	0.00167867	0.00246942	yes	up
ENSSSCG00000005924	-	1662	807.667	12.8667	5.79333	-1.15117	3.21e-51	1.33e-50	yes	down
ENSSSCG00000005925	EXOSC4	323	4638	10.2833	136.977	3.73555	0	0	yes	up
ENSSSCG00000005935	AGO2	677	1428	7.54333	15.1533	1.00636	1.1e-38	3.79e-38	yes	up
ENSSSCG00000005939	FAM135B	0.333333	4.66667	0.00333333	0.0333333	3.32193	0.00285439	0.00414076	yes	up
ENSSSCG00000005941	KHDRBS3	275.333	648.333	5.79667	12.65	1.12584	6.75e-37	2.26e-36	yes	up
ENSSSCG00000005946	WISP1	681	184.333	10.2767	3.27333	-1.65054	1.49e-80	9.01e-80	yes	down
ENSSSCG00000005953	KCNQ3	0	2.66667	0.001	0.0466667	5.54432	0.018934	0.0258206	yes	up
ENSSSCG00000005955	EFR3A	2372.33	706.653	19.31	6.50667	-1.56936	2.32e-82	1.43e-81	yes	down
ENSSSCG00000005959	-	1054.33	495	22.5133	10.3033	-1.12767	1.99e-46	7.71e-46	yes	down
ENSSSCG00000005961	-	0.333333	3.33333	0.00666667	0.0566667	3.08746	0.0244077	0.0329275	yes	up
ENSSSCG00000005969	WASHC5	2759.88	1453.46	27.8867	13.7667	-1.0184	3.13e-42	1.14e-41	yes	down
ENSSSCG00000005970	SQLE	1140	140	13.8267	1.68	-3.04092	9.47e-240	2.7e-238	yes	down
ENSSSCG00000005975	MTSS1	171.667	454.003	1.64	4.34333	1.40511	8.18e-29	2.39e-28	yes	up
ENSSSCG00000005979	ANXA13	18	41.6667	0.246667	0.52	1.07595	3.29e-05	5.3e-05	yes	up
ENSSSCG00000005983	ATAD2	303	111	1.98333	0.69	-1.52326	7.09e-42	2.56e-41	yes	down
ENSSSCG00000005984	ZHX1	1274.67	193.667	10.24	1.45333	-2.81678	8.81e-114	7.69e-113	yes	down
ENSSSCG00000005987	TBC1D31	180	67.6667	2.13667	0.723333	-1.56263	2.37e-24	6.35e-24	yes	down
ENSSSCG00000005992	SHAS2	211.667	20	2.00333	0.176667	-3.5033	1.37e-53	5.85e-53	yes	down
ENSSSCG00000005994	SNTB1	266	37	2.59667	0.343333	-2.91898	9.49e-52	3.96e-51	yes	down
ENSSSCG00000005995	MTBP	48.68	11	0.593333	0.126667	-2.22781	1.89e-14	4.09e-14	yes	down
ENSSSCG00000005997	COL14A1	7404	500.763	41.2633	2.69333	-3.9374	0	0	yes	down
ENSSSCG00000006000	TAF2	983.333	341.237	8.26	2.5	-1.72421	5.42e-60	2.52e-59	yes	down
ENSSSCG00000006003	MAL2	177.333	30.6667	2.53	0.4	-2.66107	6.42e-55	2.79e-54	yes	down
ENSSSCG00000006013	-	0	3.33333	0.001	0.133333	7.05889	0.00293417	0.00425104	yes	up
ENSSSCG00000006023	SYBU	44	141	0.93	2.75	1.56413	4.36e-22	1.12e-21	yes	up
ENSSSCG00000006024	-	337.667	60.6667	8.63333	1.48667	-2.53784	2.74e-69	1.44e-68	yes	down
ENSSSCG00000006025	PKHD1L1	6.66667	2.33333	0.0233333	0.00666667	-1.80735	0.0326959	0.0435954	yes	down
ENSSSCG00000006029	NUDCD1	914.667	448	12.7967	6.16333	-1.05399	1.05e-46	4.08e-46	yes	down
ENSSSCG00000006032	EMC2	1722.33	360.667	35.4867	6.74333	-2.39574	7.59e-180	1.25e-178	yes	down
ENSSSCG00000006033	EIF3E	4213	1151.33	52.4933	13.28	-1.98288	1.27e-170	1.92e-169	yes	down
ENSSSCG00000006035	ANGPT1	384.667	16.3333	2.75667	0.103333	-4.73755	2.4e-159	3.29e-158	yes	down
ENSSSCG00000006037	OXR1	1218.67	267.333	11.07	2.41	-2.19955	3.91e-112	3.33e-111	yes	down
ENSSSCG00000006048	DCAF13	652.333	303.333	20.0567	8.73333	-1.19948	7.76e-28	2.23e-27	yes	down
ENSSSCG00000006051	CTHRC1	1954.67	323.667	64.4667	9.99667	-2.68903	2.62e-234	7.1e-233	yes	down
ENSSSCG00000006052	FZD6	729	318.333	13.7133	5.66	-1.27671	2.48e-26	6.94e-26	yes	down
ENSSSCG00000006053	BAALC	4	16.6667	0.09	0.2	1.152	1.3e-05	2.13e-05	yes	up
ENSSSCG00000006059	NCALD	893.667	184.667	14.2533	2.58667	-2.46213	5.18e-117	4.72e-116	yes	down
ENSSSCG00000006062	-	13790	5548	226.813	94.6733	-1.26048	1.21e-112	1.04e-111	yes	down
ENSSSCG00000006066	RNF19A	4895.33	2259.33	42.45	18.2	-1.22183	1.51e-80	9.13e-80	yes	down
ENSSSCG00000006069	RGS22	48	12.6667	0.513333	0.126667	-2.01886	4.9e-13	1.02e-12	yes	down
ENSSSCG00000006070	COX6C	1697.75	738.333	21.6833	8.7	-1.3175	2.62e-56	1.16e-55	yes	down
ENSSSCG00000006071	-	943.247	382	3.17	1.2	-1.40145	7.05e-51	2.91e-50	yes	down
ENSSSCG00000006073	OSR2	37.3333	375.333	0.843333	7.72	3.19443	4.99e-101	3.82e-100	yes	up
ENSSSCG00000006074	STK3	1269.67	235	18.28	3.77	-2.27763	3.8e-123	3.72e-122	yes	down
ENSSSCG00000006079	RIDA	1226.67	245.337	10.4467	1.75333	-2.57487	8.95e-141	1.04e-139	yes	down
ENSSSCG00000006080	-	3.77667	15.0433	0.0733333	0.26	1.82597	0.000208045	0.000322385	yes	up
ENSSSCG00000006084	MTDH	2834.33	1245	16.0633	6.61	-1.28105	2.86e-51	1.18e-50	yes	down
ENSSSCG00000006087	CPQ	2687.67	739.667	65.6533	16.7	-1.97502	4.24e-209	9.32e-208	yes	down
ENSSSCG00000006088	SDC2	21036.7	3134.33	236.353	32.5933	-2.8583	0	0	yes	down
ENSSSCG00000006095	CCNE2	47.6667	13.3333	0.746667	0.22	-1.76296	2.16e-13	4.56e-13	yes	down
ENSSSCG00000006096	INTS8	242.333	83.3333	3.44667	1.11667	-1.626	3.25e-30	9.72e-30	yes	down
ENSSSCG00000006098	DPY19L4	191.667	48.3333	2.81667	0.696667	-2.01545	1.74e-31	5.32e-31	yes	down
ENSSSCG00000006099	ESRP1	1.66667	15	0.0133333	0.12	3.16993	8.77e-06	1.45e-05	yes	up
ENSSSCG00000006100	VIRMA	1965.33	991.667	12.8633	6.20667	-1.05137	6.24e-66	3.14e-65	yes	down
ENSSSCG00000006101	-	107	9	1.53	0.123333	-3.6329	1.29e-55	5.67e-55	yes	down
ENSSSCG00000006105	GEM	354.667	2179.33	7.03667	40.17	2.51315	1.29e-231	3.39e-230	yes	up
ENSSSCG00000006108	TMEM67	284.333	65.6667	3.08667	0.763333	-2.01566	2.47e-42	8.98e-42	yes	down
ENSSSCG00000006109	-	48.73	16.7267	0.773333	0.256667	-1.59119	4.03e-06	6.75e-06	yes	down
ENSSSCG00000006120	-	488.667	80.6667	6.07667	0.93	-2.70798	1.13e-120	1.07e-119	yes	down
ENSSSCG00000006126	DECR1	836.767	64.96	8.2	0.6	-3.77259	1.38e-238	3.89e-237	yes	down
ENSSSCG00000006127	NBN	322.667	98.6667	5.53667	1.52	-1.86495	9.24e-49	3.71e-48	yes	down
ENSSSCG00000006132	MMP16	177.333	55.3333	1.13667	0.476667	-1.25376	1.36e-17	3.15e-17	yes	down
ENSSSCG00000006136	RMDN1	442.74	111.37	10.31	2.67333	-1.94733	9.69e-67	4.94e-66	yes	down
ENSSSCG00000006137	WWP1	1729.59	227.963	11.7767	1.45667	-3.01519	5.35e-188	9.74e-187	yes	down
ENSSSCG00000006138	ATP6V0D2	5	20	0.09	0.353333	1.97303	4.95e-06	8.27e-06	yes	up
ENSSSCG00000006140	CA2	15.3333	55.6667	0.316667	0.973333	1.61997	8.07e-11	1.58e-10	yes	up
ENSSSCG00000006145	E2F5	99	226	2.98333	6.32	1.083	8.77e-18	2.05e-17	yes	up
ENSSSCG00000006146	LRRCC1	183.667	30	2.52333	0.383333	-2.71866	4.38e-55	1.91e-54	yes	down
ENSSSCG00000006151	SNX16	182	47.6667	2.18667	0.546667	-2	9.8e-30	2.91e-29	yes	down
ENSSSCG00000006153	FABP5	153.333	409.333	3.85667	9.65	1.32317	1.17e-34	3.77e-34	yes	up
ENSSSCG00000006159	HEY1	10	33.3333	0.0866667	0.26	1.58496	2.03e-06	3.43e-06	yes	up
ENSSSCG00000006160	STMN2	154	48.3333	2.74333	0.803333	-1.77186	8.21e-31	2.48e-30	yes	down
ENSSSCG00000006161	IL7	99	27.3333	2	0.55	-1.8625	4.4e-17	1.02e-16	yes	down
ENSSSCG00000006162	-	456	80	5.14	0.833333	-2.6248	1.9e-86	1.24e-85	yes	down
ENSSSCG00000006163	PKIA	655.333	142.333	6.88	1.38	-2.31774	4.69e-116	4.23e-115	yes	down
ENSSSCG00000006165	SEC31B	82.6667	575.333	0.78	5.09667	2.70801	6.89e-108	5.66e-107	yes	up
ENSSSCG00000006169	ZFHX4	14.6667	74.3333	0.0566667	0.253333	2.16046	1.21e-17	2.81e-17	yes	up
ENSSSCG00000006171	CRISPLD1	1383.33	126.333	11.98	1.04	-3.52597	4.16e-230	1.08e-228	yes	down
ENSSSCG00000006174	JPH1	9.33333	61.3333	0.09	0.54	2.58496	6.34e-19	1.52e-18	yes	up
ENSSSCG00000006177	UBE2W	765.333	255	18.5067	7.95333	-1.21841	6.11e-65	3.03e-64	yes	down
ENSSSCG00000006179	-	772	156.333	7.17333	1.39	-2.36756	4.97e-108	4.1e-107	yes	down
ENSSSCG00000006183	SBSPON	2.66667	0	0.0333333	0.001	-5.05889	0.018934	0.0258206	yes	down
ENSSSCG00000006187	MSC	71	271.667	0.75	2.67667	1.83547	5.76e-38	1.96e-37	yes	up
ENSSSCG00000006193	TRAM1	3937.67	1008	53.0767	17.6167	-1.59114	2.84e-175	4.49e-174	yes	down
ENSSSCG00000006197	SULF1	6099.67	1453.67	48.9067	10.7733	-2.18257	4.4e-186	7.85e-185	yes	down
ENSSSCG00000006199	PREX2	0	3.33333	0.001	0.0233333	4.54432	0.00290322	0.00420799	yes	up
ENSSSCG00000006201	ARFGEF1	1588.33	746.333	8.68667	3.80333	-1.19154	4.16e-54	1.79e-53	yes	down
ENSSSCG00000006202	CSPP1	236.367	87.6667	2.17	0.74	-1.5521	1.08e-31	3.32e-31	yes	down
ENSSSCG00000006206	SGK3	187.667	42	2.72667	0.643333	-2.0835	2.47e-43	9.13e-43	yes	down
ENSSSCG00000006214	RRS1	163	657.667	6.00667	22.6733	1.91636	1.26e-77	7.33e-77	yes	up
ENSSSCG00000006220	ARMC1	846.333	289.667	10.1067	3.25	-1.6368	8.49e-61	3.99e-60	yes	down
ENSSSCG00000006231	CHD7	264.333	678.333	1.20333	2.87	1.25401	1.54e-42	5.61e-42	yes	up
ENSSSCG00000006232	RAB2A	6251	3109	111.653	51.5733	-1.11433	8.35e-86	5.38e-85	yes	down
ENSSSCG00000006233	CA8	4.66667	15.6667	0.0666667	0.223333	1.74416	0.000508793	0.000772878	yes	up
ENSSSCG00000006240	FAM110B	24	199.667	0.89	6.75333	2.92372	3.22e-62	1.54e-61	yes	up
ENSSSCG00000006245	-	3.66667	0.333333	0.0666667	0.00666667	-3.32193	0.00970964	0.0135888	yes	down
ENSSSCG00000006247	PLAG1	42.3333	12	0.443333	0.116667	-1.926	4.6e-08	8.28e-08	yes	down
ENSSSCG00000006251	TGS1	316	802.297	3.28667	9.15667	1.4782	8.04e-43	2.95e-42	yes	up
ENSSSCG00000006252	TMEM68	276.333	118.37	4.55	1.97	-1.20767	1.32e-17	3.07e-17	yes	down
ENSSSCG00000006256	SOX17	0	204.333	0.001	5.38	12.3934	4.23e-117	3.86e-116	yes	up
ENSSSCG00000006260	-	1746.33	647.333	14.2167	4.90667	-1.53477	7.42e-113	6.4e-112	yes	down
ENSSSCG00000006262	RGS20	13.3333	85.3333	0.0833333	0.49	2.55582	7.34e-27	2.07e-26	yes	up
ENSSSCG00000006267	PCMTD1	1683.33	402.667	17.0333	4	-2.09029	1.13e-107	9.27e-107	yes	down
ENSSSCG00000006280	GORAB	333.333	108.333	9.21	2.78667	-1.72466	2.35e-45	8.93e-45	yes	down
ENSSSCG00000006281	METTL11B	2.66667	0	0.0766667	0.001	-6.26053	0.0108203	0.0150761	yes	down
ENSSSCG00000006282	KIFAP3	1925	429	21.4867	4.35333	-2.30325	1.16e-145	1.4e-144	yes	down
ENSSSCG00000006285	METTL18	63.48	32.6167	1.63	0.756667	-1.10714	3.03e-07	5.3e-07	yes	down
ENSSSCG00000006287	SELL	15	0	0.123333	0.001	-6.94642	5.93e-13	1.23e-12	yes	down
ENSSSCG00000006288	SELP	101.667	5.33333	1.75667	0.1	-4.13477	4.39e-44	1.64e-43	yes	down
ENSSSCG00000006289	F5	1177.67	303	6.62333	1.58667	-2.06156	1.51e-114	1.33e-113	yes	down
ENSSSCG00000006294	NME7	208.903	15.1667	5.10333	0.226667	-4.4928	1.22e-88	8.16e-88	yes	down
ENSSSCG00000006296	ATP1B1	2672.02	710.173	60.23	15.8767	-1.92357	1.33e-134	1.46e-133	yes	down
ENSSSCG00000006301	TIPRL	535.667	241.667	4.64333	1.95	-1.25169	1.77e-30	5.32e-30	yes	down
ENSSSCG00000006302	GPR161	126	283.333	1.37667	2.91	1.07984	9.16e-17	2.1e-16	yes	up
ENSSSCG00000006303	DCAF6	1735.67	775	20.8367	9.73	-1.09861	4.61e-75	2.6e-74	yes	down
ENSSSCG00000006304	-	618.667	298.333	18.6867	8.26333	-1.17721	3.8e-28	1.1e-27	yes	down
ENSSSCG00000006307	RCSD1	5.33333	119.667	0.0633333	1.34	4.40312	4.18e-64	2.05e-63	yes	up
ENSSSCG00000006308	CREG1	3256.7	809.793	53.24	12.4167	-2.10023	1.01e-185	1.79e-184	yes	down
ENSSSCG00000006309	CD247	239.637	845.873	2.19667	7.26333	1.72532	5.01e-77	2.9e-76	yes	up
ENSSSCG00000006324	ALDH9A1	1565	6406	24.39	96.0433	1.9774	8.59e-230	2.24e-228	yes	up
ENSSSCG00000006325	MGST3	2163.33	983.667	101.153	42.76	-1.24221	7.46e-71	3.99e-70	yes	down
ENSSSCG00000006329	LMX1A	0	13.6667	0.001	0.27	8.07682	2.71e-11	5.39e-11	yes	up
ENSSSCG00000006333	NUF2	177.667	20.6667	3.52333	0.38	-3.21287	4.63e-66	2.34e-65	yes	down
ENSSSCG00000006335	RGS4	424.667	83.6667	5.75667	1.04333	-2.46403	6.04e-88	4.01e-87	yes	down
ENSSSCG00000006337	HSD17B7	250.667	103.667	6.95333	2.65333	-1.3899	1.42e-27	4.07e-27	yes	down
ENSSSCG00000006338	DDR2	1099	266	14.0933	3.22333	-2.12839	1.63e-90	1.11e-89	yes	down
ENSSSCG00000006340	UAP1	1446	467	19.29	5.43	-1.82883	7.81e-126	7.82e-125	yes	down
ENSSSCG00000006342	UHMK1	1706.67	431.333	8.36	2.57667	-1.698	2.04e-87	1.34e-86	yes	down
ENSSSCG00000006345	OLFML2B	707.333	168.667	7.32	1.63667	-2.16108	9.7e-82	5.94e-81	yes	down
ENSSSCG00000006347	DUSP12	189.553	516.79	4.54667	11.41	1.32742	5.2e-30	1.55e-29	yes	up
ENSSSCG00000006350	-	1	5	0.03	0.136667	2.18763	0.0361255	0.0480097	yes	up
ENSSSCG00000006352	MPZ	1.66667	12.6667	0.03	0.18	2.58496	0.000495577	0.00075314	yes	up
ENSSSCG00000006363	-	1296.5	529.323	53.01	19.86	-1.4164	6.04e-67	3.09e-66	yes	down
ENSSSCG00000006366	PFDN2	890.873	3333.17	24.19	84.1233	1.7981	1.71e-151	2.18e-150	yes	up
ENSSSCG00000006370	TSTD1	196.333	107.333	13.41	6.66667	-1.00827	6.21e-11	1.22e-10	yes	down
ENSSSCG00000006371	USF1	811	2305.67	16.8567	42.46	1.33279	1.15e-79	6.9e-79	yes	up
ENSSSCG00000006372	ARHGAP30	2.33333	40.6667	0.0266667	0.376667	3.82018	6.51e-23	1.7e-22	yes	up
ENSSSCG00000006383	VANGL2	82.3333	235.667	0.596667	1.65667	1.47329	3.31e-27	9.4e-27	yes	up
ENSSSCG00000006385	NCSTN	2596.95	1143.4	34.2167	13.36	-1.35678	3.39e-84	2.14e-83	yes	down
ENSSSCG00000006390	CASQ1	71.9467	8	0.986667	0.0733333	-3.75002	4.91e-31	1.49e-30	yes	down
ENSSSCG00000006395	-	14012.7	6985.33	352.483	162.567	-1.11652	1.63e-59	7.52e-59	yes	down
ENSSSCG00000006396	IGSF9	14	80	0.123333	0.68	2.46297	2e-24	5.39e-24	yes	up
ENSSSCG00000006415	CADM3	0.333333	62	0.00333333	0.66	7.62936	7.18e-37	2.4e-36	yes	up
ENSSSCG00000006452	CD1D	0.333333	13.3333	0.00333333	0.293333	6.45943	1.46e-09	2.78e-09	yes	up
ENSSSCG00000006453	KIRREL1	1833	4769.67	16.7067	40.8133	1.28862	3.74e-66	1.89e-65	yes	up
ENSSSCG00000006462	-	3.66667	0.666667	0.0433333	0.00666667	-2.70044	0.0300013	0.0401574	yes	down
ENSSSCG00000006463	PEAR1	3.33333	21	0.0233333	0.15	2.6845	1.42e-08	2.61e-08	yes	up
ENSSSCG00000006464	NTRK1	1	346.333	0.00666667	2.84333	8.7364	2.39e-185	4.22e-184	yes	up
ENSSSCG00000006465	INSRR	0	6.66667	0.001	0.0666667	6.05889	7.55e-06	1.25e-05	yes	up
ENSSSCG00000006466	SH2D2A	9.33333	125.667	0.143333	1.77	3.6263	8.25e-52	3.45e-51	yes	up
ENSSSCG00000006467	PRCC	753.667	1920	15.45	37.1967	1.26757	2.97e-42	1.08e-41	yes	up
ENSSSCG00000006470	RRNAD1	145.55	782.777	2.53333	12.61	2.31546	2.3e-101	1.77e-100	yes	up
ENSSSCG00000006471	ISG20L2	618.183	3052.03	10.6633	48.6233	2.18899	4.28e-268	1.54e-266	yes	up
ENSSSCG00000006472	CRABP2	5.33333	177	0.236667	6.82333	4.84955	4.27e-90	2.91e-89	yes	up
ENSSSCG00000006475	IQGAP3	393	178.53	2.56667	1.06667	-1.26679	5.46e-24	1.46e-23	yes	down
ENSSSCG00000006478	HAPLN2	0.333333	11.6667	0.01	0.283333	4.82443	3.95e-06	6.62e-06	yes	up
ENSSSCG00000006481	GPATCH4	198.8	810.857	2.13	8.15333	1.93654	4.28e-70	2.28e-69	yes	up
ENSSSCG00000006482	MEF2D	1682.33	4458.67	17.22	39.7133	1.20554	3.41e-69	1.8e-68	yes	up
ENSSSCG00000006490	-	2436.16	9976.02	21.9667	84.5267	1.94409	9.54e-261	3.23e-259	yes	up
ENSSSCG00000006493	PMF1	26.12	89.0067	0.263333	0.94	1.83577	2.67e-17	6.18e-17	yes	up
ENSSSCG00000006495	SEMA4A	31.3333	15.6667	0.41	0.193333	-1.08453	0.000178098	0.000276967	yes	down
ENSSSCG00000006496	LMNA	16912	67559.7	209.863	775.703	1.88605	5.91e-185	1.04e-183	yes	up
ENSSSCG00000006497	MEX3A	20	46.6667	0.506667	1.14	1.16993	2.51e-05	4.08e-05	yes	up
ENSSSCG00000006500	UBQLN4	647.333	2569	7.09333	25.9867	1.87324	2.26e-143	2.7e-142	yes	up
ENSSSCG00000006504	KHDC4	715.667	1558	9.19667	22.5733	1.29544	1.28e-46	4.95e-46	yes	up
ENSSSCG00000006506	SYT11	349.667	834	3.04667	6.81667	1.16183	1.08e-45	4.12e-45	yes	up
ENSSSCG00000006518	HCN3	38.7933	241.687	0.22	1.27667	2.53681	4.48e-64	2.2e-63	yes	up
ENSSSCG00000006524	THBS3	2513.67	1198.67	17.12	7.66	-1.16027	9.98e-50	4.06e-49	yes	down
ENSSSCG00000006525	-	40.9233	297.687	0.276667	1.87	2.75682	8.5e-75	4.78e-74	yes	up
ENSSSCG00000006526	TRIM46	27.84	209.22	0.34	2.41667	2.82941	1.8e-64	8.84e-64	yes	up
ENSSSCG00000006528	DPM3	6.27333	25.82	0.95	3.54333	1.89911	4.28e-07	7.44e-07	yes	up
ENSSSCG00000006531	-	6	14.6667	0.423333	1.01333	1.25924	0.0163276	0.0224014	yes	up
ENSSSCG00000006542	KCNN3	6	335	0.0866667	4.45667	5.68434	4.29e-139	4.9e-138	yes	up
ENSSSCG00000006543	ADAR	716.333	2082	8.52	23.0067	1.43313	1.79e-97	1.31e-96	yes	up
ENSSSCG00000006546	TDRD10	0.666667	39.6667	0.0166667	0.903333	5.76022	6.71e-28	1.93e-27	yes	up
ENSSSCG00000006547	SHE	0	150	0.001	0.903333	9.81911	1.98e-94	1.41e-93	yes	up
ENSSSCG00000006551	AQP10	0	21	0.001	0.753333	9.55714	2.13e-16	4.85e-16	yes	up
ENSSSCG00000006554	C1orf43	863.667	2668.67	12.2533	35.05	1.51624	1.03e-103	8.12e-103	yes	up
ENSSSCG00000006559	JTB	630.57	1510.22	25.6467	57.69	1.16955	4.43e-51	1.83e-50	yes	up
ENSSSCG00000006562	GATAD2B	378.333	706.333	2.93667	7.35333	1.32422	7.5e-21	1.89e-20	yes	up
ENSSSCG00000006567	CRTC2	715.667	3290	11.0533	47.3067	2.09756	3.83e-246	1.15e-244	yes	up
ENSSSCG00000006568	DENND4B	750	2547.67	5.68	16.82	1.56621	2.23e-150	2.82e-149	yes	up
ENSSSCG00000006569	SLC27A3	8.63333	19.2067	0.133333	0.29	1.12102	0.00345395	0.00497856	yes	up
ENSSSCG00000006571	INTS3	496.7	1678.79	3.60667	11.38	1.65776	1.25e-124	1.24e-123	yes	up
ENSSSCG00000006577	S100A5	7	17.3333	0.333333	0.703333	1.07724	0.00308989	0.00446786	yes	up
ENSSSCG00000006578	S100A4	543.667	3156.67	28.5267	155.63	2.44774	8.55e-187	1.54e-185	yes	up
ENSSSCG00000006581	-	5425.33	3064	158.367	68.12	-1.21712	1.36e-37	4.6e-37	yes	down
ENSSSCG00000006588	S100A9	0.333333	8.66667	0.01	0.186667	4.22239	2.28e-06	3.85e-06	yes	up
ENSSSCG00000006622	POGZ	514.393	1117.86	4.63333	9.47	1.03131	1.35e-32	4.23e-32	yes	up
ENSSSCG00000006626	PI4KB	1255.63	5156.38	13.8067	51.8167	1.90805	1.93e-237	5.37e-236	yes	up
ENSSSCG00000006627	ZNF687	645.7	3613.62	5.51	28.68	2.37992	1.84e-282	7.45e-281	yes	up
ENSSSCG00000006632	SCNM1	314.217	814.99	2.89	6.87	1.24924	4.54e-35	1.47e-34	yes	up
ENSSSCG00000006643	ANXA9	24.8033	68.36	0.193333	0.526667	1.4458	4.47e-08	8.05e-08	yes	up
ENSSSCG00000006645	SETDB1	403.38	1250.4	3.06	9.32667	1.60783	5.32e-71	2.86e-70	yes	up
ENSSSCG00000006646	ARNT	4073.85	12939.2	39.92	117.05	1.55194	3.04e-150	3.84e-149	yes	up
ENSSSCG00000006648	CTSS	195.147	444.427	1.77667	3.70333	1.05965	9.2e-20	2.26e-19	yes	up
ENSSSCG00000006649	HORMAD1	5.33333	0.666667	0.113333	0.0133333	-3.08746	0.0126486	0.0175083	yes	down
ENSSSCG00000006661	VPS45	676	212.667	10.6767	3.14333	-1.76409	9.52e-79	5.62e-78	yes	down
ENSSSCG00000006665	-	1212	4080.33	14.87	46.2333	1.63653	3.25e-121	3.11e-120	yes	up
ENSSSCG00000006666	SV2A	1	9.33333	0.01	0.08	3	2.68e-05	4.35e-05	yes	up
ENSSSCG00000006667	BOLA1	460.333	1061	9.65	20.6667	1.0987	4.91e-42	1.78e-41	yes	up
ENSSSCG00000006690	NUDT17	28.8433	65.8433	0.756667	1.58	1.06219	7.1e-07	1.23e-06	yes	up
ENSSSCG00000006691	POLR3C	365.133	807.51	2.28	4.71333	1.04771	1.85e-39	6.44e-39	yes	up
ENSSSCG00000006694	-	712.8	379.55	16.0433	7.55333	-1.08679	8.9e-33	2.79e-32	yes	down
ENSSSCG00000006696	GJA5	6.66667	2.66667	0.0833333	0.0333333	-1.32193	0.0333087	0.044381	yes	down
ENSSSCG00000006697	ACP6	429.333	1023.33	9.65667	21.4033	1.14824	2e-43	7.4e-43	yes	up
ENSSSCG00000006702	FMO5	89	12	0.573333	0.0666667	-3.10434	1.34e-33	4.26e-33	yes	down
ENSSSCG00000006703	-	854.333	330.333	6.24	2.32	-1.42742	3.2e-67	1.64e-66	yes	down
ENSSSCG00000006711	-	5.74	26.2467	0.0766667	0.323333	2.07635	1.01e-07	1.8e-07	yes	up
ENSSSCG00000006717	PHGDH	5813.29	2838.14	124.57	56.3833	-1.14362	8.02e-82	4.92e-81	yes	down
ENSSSCG00000006718	ZNF697	362	1732	7.60667	34.1433	2.16627	9.35e-126	9.36e-125	yes	up
ENSSSCG00000006719	-	11558	58	271.983	1.26	-7.75395	0	0	yes	down
ENSSSCG00000006720	HAO2	98.3333	24.6667	1.72333	0.456667	-1.91599	8.95e-22	2.3e-21	yes	down
ENSSSCG00000006725	TBX15	11	92.3333	0.226667	1.82333	3.00793	4.37e-29	1.28e-28	yes	up
ENSSSCG00000006727	WDR3	720.333	2721.33	7.69667	27.1567	1.819	1.14e-175	1.82e-174	yes	up
ENSSSCG00000006730	MAN1A2	1107.33	394.667	5.19333	1.73	-1.58589	1.37e-66	6.94e-66	yes	down
ENSSSCG00000006731	VTCN1	0	6	0.001	0.263333	8.04075	2.45e-05	3.97e-05	yes	up
ENSSSCG00000006732	TRIM45	278.17	809.367	3.26333	8.56	1.39126	1.13e-49	4.61e-49	yes	up
ENSSSCG00000006733	TTF2	648.493	1670.02	5.71667	13.4667	1.23615	7.87e-68	4.07e-67	yes	up
ENSSSCG00000006737	IGSF3	49.3333	182	0.553333	1.93667	1.80735	9.36e-23	2.44e-22	yes	up
ENSSSCG00000006745	CASQ2	340.333	22	11.4033	0.666667	-4.09635	2.79e-136	3.11e-135	yes	down
ENSSSCG00000006746	VANGL1	351.333	1290	4.09	14.9233	1.8674	3.29e-96	2.38e-95	yes	up
ENSSSCG00000006748	TSPAN2	825.333	85.6667	22.0333	2.84	-2.95572	4.96e-176	7.9e-175	yes	down
ENSSSCG00000006752	CSDE1	8457	2614.67	82.19	22.42	-1.87418	5.98e-196	1.18e-194	yes	down
ENSSSCG00000006754	AMPD1	8.33333	3.33333	0.0566667	0.0266667	-1.08746	0.0182553	0.0249492	yes	down
ENSSSCG00000006758	SYT6	2	36.3333	0.0166667	0.283333	4.08746	1.39e-20	3.49e-20	yes	up
ENSSSCG00000006761	DCLRE1B	601.093	1352.83	10.62	22.1333	1.05944	1.77e-48	7.08e-48	yes	up
ENSSSCG00000006764	PTPN22	1.33333	6.66667	0.0166667	0.0933333	2.48543	0.0142049	0.0195794	yes	up
ENSSSCG00000006766	PHTF1	166.027	31.1167	0.926667	0.176667	-2.39102	2.38e-43	8.79e-43	yes	down
ENSSSCG00000006767	MAGI3	390.307	186.217	3.12667	1.43	-1.12861	1.08e-17	2.51e-17	yes	down
ENSSSCG00000006775	CAPZA1	4387.7	1101.16	60.3633	14.1067	-2.0973	2.09e-158	2.85e-157	yes	down
ENSSSCG00000006777	RHOC	7787.86	19233.3	251.9	573.847	1.18781	4.25e-64	2.08e-63	yes	up
ENSSSCG00000006785	RAP1A	1121	415.667	31.91	10.5433	-1.59768	4.53e-50	1.85e-49	yes	down
ENSSSCG00000006790	WDR77	1335.67	3058.33	25.1533	54.4667	1.11462	1.31e-61	6.19e-61	yes	up
ENSSSCG00000006791	OVGP1	20	238.333	0.446667	4.77	3.41672	5.78e-77	3.35e-76	yes	up
ENSSSCG00000006793	-	252	104.073	4.67	1.83667	-1.34633	8.63e-24	2.3e-23	yes	down
ENSSSCG00000006799	LRIF1	82.3333	36.3333	0.686667	0.276667	-1.31146	4.26e-10	8.2e-10	yes	down
ENSSSCG00000006800	CD53	7.57333	22.9333	0.0566667	0.156667	1.46713	9.3e-05	0.000146743	yes	up
ENSSSCG00000006809	RBM15	425.333	763	3.38333	7.68	1.18266	9.42e-19	2.25e-18	yes	up
ENSSSCG00000006810	KCNC4	12	230	0.16	2.82	4.13955	5.61e-104	4.42e-103	yes	up
ENSSSCG00000006811	SLC6A17	471	7457.33	2.78	41.34	3.89438	0	0	yes	up
ENSSSCG00000006812	ALX3	0	9.66667	0.001	0.363333	8.50515	6.41e-07	1.11e-06	yes	up
ENSSSCG00000006813	STRIP1	676.333	2056.33	4.20667	11.9267	1.50344	1.62e-104	1.28e-103	yes	up
ENSSSCG00000006820	EPS8L3	0	10	0.001	0.153333	7.26053	5.95e-08	1.07e-07	yes	up
ENSSSCG00000006821	GSTM3	109.667	292	3.51	8.83333	1.33149	5.24e-23	1.37e-22	yes	up
ENSSSCG00000006827	CYB561D1	139	536.667	1.74667	6.24667	1.83848	6.08e-69	3.19e-68	yes	up
ENSSSCG00000006828	-	166.667	832.667	2.84	13.0333	2.19824	6.3e-83	3.91e-82	yes	up
ENSSSCG00000006829	SYPL2	29.3333	73.3333	0.326667	0.836667	1.35683	2.25e-09	4.24e-09	yes	up
ENSSSCG00000006831	SORT1	6090.16	2048.45	40.75	12.82	-1.6684	2.77e-129	2.88e-128	yes	down
ENSSSCG00000006841	CLCC1	971	358	8.83667	3.29	-1.42541	2.19e-85	1.4e-84	yes	down
ENSSSCG00000006842	-	1	5	0.0433333	0.196667	2.1822	0.0241463	0.0325852	yes	up
ENSSSCG00000006846	HENMT1	3	23.3333	0.0766667	0.586667	2.93587	1.29e-08	2.37e-08	yes	up
ENSSSCG00000006848	SLC25A24	1840.33	749.667	19.9633	7.19667	-1.47195	3.15e-56	1.39e-55	yes	down
ENSSSCG00000006853	PRMT6	108	755.333	2.8	18.6433	2.73516	4.29e-110	3.61e-109	yes	up
ENSSSCG00000006857	COL11A1	41943.3	250.333	269.533	1.52667	-7.46393	0	0	yes	down
ENSSSCG00000006858	OLFM3	156.333	6.66667	4.48	0.186667	-4.58496	9.57e-72	5.18e-71	yes	down
ENSSSCG00000006860	SLC30A7	1231.27	486.343	12.7767	4.88333	-1.38757	3.98e-76	2.28e-75	yes	down
ENSSSCG00000006866	DBT	238	80.6667	3.46333	1.17333	-1.56155	8.15e-32	2.51e-31	yes	down
ENSSSCG00000006867	-	9.12333	2.85333	0.113333	0.0333333	-1.76553	0.0365104	0.0484984	yes	down
ENSSSCG00000006869	TRMT13	155.877	42.48	1.96	0.713333	-1.45821	8.06e-24	2.15e-23	yes	down
ENSSSCG00000006870	-	784.333	322	10.7367	4.27667	-1.32799	4.77e-36	1.58e-35	yes	down
ENSSSCG00000006871	SLC35A3	168	39.6667	3.93	0.856667	-2.19772	8.27e-32	2.55e-31	yes	down
ENSSSCG00000006872	AGL	533.667	123.333	2.93333	0.74	-1.98694	3.14e-76	1.8e-75	yes	down
ENSSSCG00000006873	FRRS1	192.667	61.3333	2.74333	0.85	-1.6904	1.26e-34	4.07e-34	yes	down
ENSSSCG00000006874	PALMD	30	9	0.576667	0.18	-1.67974	1.13e-07	2e-07	yes	down
ENSSSCG00000006875	PLPPR4	0.666667	5	0.00666667	0.0466667	2.80735	0.00400933	0.0057556	yes	up
ENSSSCG00000006877	SNX7	547	284	13.88	6.20333	-1.16189	6.86e-25	1.87e-24	yes	down
ENSSSCG00000006885	ALG14	221.333	114.333	7.54333	3.71333	-1.02249	2.47e-16	5.62e-16	yes	down
ENSSSCG00000006889	ARHGAP29	3251.33	644	24.2833	4.42333	-2.45676	5.51e-260	1.85e-258	yes	down
ENSSSCG00000006890	ABCA4	65.6667	17.6667	0.386667	0.0933333	-2.05063	1.62e-13	3.42e-13	yes	down
ENSSSCG00000006897	CCDC18	34.6667	11.3333	0.323333	0.0966667	-1.74193	1.2e-06	2.05e-06	yes	down
ENSSSCG00000006898	MTF2	339	167.667	4.12	1.68333	-1.29132	9.92e-18	2.31e-17	yes	down
ENSSSCG00000006900	FAM69A	1069.8	85.07	19.95	1.84333	-3.436	2.28e-227	5.83e-226	yes	down
ENSSSCG00000006902	GFI1	0	33	0.001	1.02333	9.99906	1.04e-22	2.71e-22	yes	up
ENSSSCG00000006904	GLMN	119	66	2.06667	1.03	-1.00466	9.12e-09	1.69e-08	yes	down
ENSSSCG00000006912	HFM1	33	1.33333	0.29	0.0133333	-4.44294	1.51e-19	3.67e-19	yes	down
ENSSSCG00000006914	BARHL2	0	2.33333	0.001	0.0333333	5.05889	0.0211406	0.0286821	yes	up
ENSSSCG00000006919	-	41.6667	116	0.46	1.32667	1.5281	2.23e-15	4.95e-15	yes	up
ENSSSCG00000006925	KYAT3	1388.33	336	25.08	5.65667	-2.14851	3.57e-124	3.54e-123	yes	down
ENSSSCG00000006928	LMO4	3747.67	1269	107.47	35.3033	-1.60606	2.23e-158	3.03e-157	yes	down
ENSSSCG00000006932	-	1.66667	17	0.02	0.226667	3.5025	7.16e-07	1.24e-06	yes	up
ENSSSCG00000006933	CLCA1	0	7.33333	0.001	0.0866667	6.43741	2.98e-06	5.02e-06	yes	up
ENSSSCG00000006936	ODF2L	82.3333	37.3333	1.05333	0.44	-1.25939	3.29e-09	6.17e-09	yes	down
ENSSSCG00000006950	WDR63	99	30	1.64333	0.566667	-1.53605	1.4e-22	3.63e-22	yes	down
ENSSSCG00000006954	EEF1D	3703.71	9582.91	123.007	282.87	1.2014	6.42e-76	3.66e-75	yes	up
ENSSSCG00000006956	ZC3H3	528.333	2156.67	5.76333	21.7133	1.91361	1.41e-113	1.23e-112	yes	up
ENSSSCG00000006958	TOP1MT	83.3333	464.333	1.92	9.95	2.37359	1.08e-71	5.86e-71	yes	up
ENSSSCG00000006959	ZNF696	61	447.667	2.50333	16.7933	2.74597	4.27e-85	2.73e-84	yes	up
ENSSSCG00000006963	-	0.333333	21.3333	0.01	0.506667	5.66297	2.32e-13	4.87e-13	yes	up
ENSSSCG00000006969	TRMT9B	95.6667	31.6667	1.01	0.32	-1.65821	4e-19	9.66e-19	yes	down
ENSSSCG00000006981	MICU3	225	28	2.32333	0.32	-2.86005	1.1e-77	6.44e-77	yes	down
ENSSSCG00000006982	ZDHHC2	2132.67	327.667	26.3467	4.00333	-2.71835	9.22e-271	3.36e-269	yes	down
ENSSSCG00000006983	CNOT7	1208	399.667	23.38	8.76	-1.41627	9.29e-55	4.03e-54	yes	down
ENSSSCG00000006987	SLC7A2	75.3333	182.667	0.496667	1.00667	1.01924	2.2e-17	5.1e-17	yes	up
ENSSSCG00000006988	-	121.333	28.3333	3.07	0.66	-2.2177	5.86e-32	1.81e-31	yes	down
ENSSSCG00000006994	PCM1	2124	560.667	11.9567	2.92667	-2.03048	2.93e-119	2.74e-118	yes	down
ENSSSCG00000006995	ASAH1	2622	825	45.27	13.9333	-1.70001	3.47e-115	3.08e-114	yes	down
ENSSSCG00000007001	-	23	1	0.266667	0.01	-4.73697	3.94e-17	9.09e-17	yes	down
ENSSSCG00000007005	CSGALNACT1	97.2033	45.1733	3.16	1.37	-1.20575	1.22e-12	2.51e-12	yes	down
ENSSSCG00000007022	ANK1	4.66667	23.3333	0.03	0.136667	2.18763	4.54e-05	7.28e-05	yes	up
ENSSSCG00000007030	IKBKB	892.333	2482	12.0333	30.48	1.34083	2.35e-104	1.86e-103	yes	up
ENSSSCG00000007031	-	582.073	284.017	10.5833	4.80333	-1.13969	1.8e-36	5.99e-36	yes	down
ENSSSCG00000007032	PLAT	4545.33	1701	109.1	38.3933	-1.50672	5.16e-100	3.9e-99	yes	down
ENSSSCG00000007043	GPCPD1	822.667	203	8.04667	1.73333	-2.21484	1.84e-112	1.58e-111	yes	down
ENSSSCG00000007046	TRMT6	584.333	239.667	4.05667	1.55333	-1.38493	9.31e-44	3.46e-43	yes	down
ENSSSCG00000007052	FERMT1	457.667	111	5.58	1.27333	-2.13165	5.47e-70	2.91e-69	yes	down
ENSSSCG00000007056	PLCB1	1890.33	264	12.9733	2.08	-2.64089	6.58e-202	1.37e-200	yes	down
ENSSSCG00000007058	PLCB4	1003.33	77.3333	7.76	0.566667	-3.77548	1.31e-211	2.96e-210	yes	down
ENSSSCG00000007062	LAMP5	2.66667	35.6667	0.07	0.716667	3.35588	3.51e-13	7.33e-13	yes	up
ENSSSCG00000007064	MKKS	548.333	206.667	6.13333	2.13	-1.52582	1.34e-50	5.49e-50	yes	down
ENSSSCG00000007067	JAG1	1133.33	3297.33	4.95333	13.4333	1.43935	1.75e-102	1.36e-101	yes	up
ENSSSCG00000007072	SPTLC3	65	16.3333	0.366667	0.0866667	-2.08092	4.48e-19	1.08e-18	yes	down
ENSSSCG00000007073	-	1756	473.333	35.1667	10.4433	-1.75163	1.16e-92	8.13e-92	yes	down
ENSSSCG00000007077	ESF1	373.893	139.703	2.18333	0.743333	-1.55445	1.01e-14	2.21e-14	yes	down
ENSSSCG00000007079	FLRT3	613.333	268.667	5.52333	2.32	-1.25141	9.91e-31	2.99e-30	yes	down
ENSSSCG00000007085	-	21376.7	2993.67	422.453	55.0367	-2.94033	0	0	yes	down
ENSSSCG00000007093	ZNF133	112.333	722.333	1.79	10.5	2.55236	6.84e-59	3.13e-58	yes	up
ENSSSCG00000007106	INSM1	0	5.66667	0.001	0.136667	7.09452	5.93e-05	9.45e-05	yes	up
ENSSSCG00000007108	KIZ	480.333	255	9.26	4.57	-1.01882	1.01e-25	2.8e-25	yes	down
ENSSSCG00000007112	PAX1	8.33333	325	0.25	9.13333	5.19114	7.34e-120	6.88e-119	yes	up
ENSSSCG00000007119	NXT1	302.667	1379	13.13	54.92	2.06446	1.38e-80	8.36e-80	yes	up
ENSSSCG00000007130	SYNDIG1	0	47.3333	0.001	0.863333	9.75377	3.3e-24	8.85e-24	yes	up
ENSSSCG00000007133	ACSS1	1953.67	8982.67	23.0033	100.33	2.12484	2.76e-253	8.69e-252	yes	up
ENSSSCG00000007135	-	2518.33	1102.33	25.69	10.5367	-1.28579	1.05e-63	5.09e-63	yes	down
ENSSSCG00000007139	ADRA1D	3.33333	51.6667	0.0866667	1.10333	3.67025	6.07e-25	1.65e-24	yes	up
ENSSSCG00000007140	SMOX	928.667	10890.3	14.2033	154	3.43863	0	0	yes	up
ENSSSCG00000007142	PANK2	670.333	2374.67	4.85333	15.7933	1.70227	6.66e-97	4.85e-96	yes	up
ENSSSCG00000007146	SIGLEC1	48.3333	17.6667	0.196667	0.07	-1.49033	1.04e-07	1.85e-07	yes	down
ENSSSCG00000007147	-	13.79	29.98	0.08	0.163333	1.02975	0.00106801	0.00159015	yes	up
ENSSSCG00000007157	SLC4A11	16.3333	77	0.16	0.7	2.12928	2.08e-21	5.29e-21	yes	up
ENSSSCG00000007160	DDRGK1	986	1991	21.0433	42.5733	1.01659	3.48e-28	1.01e-27	yes	up
ENSSSCG00000007162	UBOX5	369.333	1567.67	5.94333	23.8367	2.00384	7.92e-120	7.43e-119	yes	up
ENSSSCG00000007163	AVP	0	3.66667	0.001	0.126667	6.98489	0.00167798	0.00246862	yes	up
ENSSSCG00000007167	VPS16	1936.33	4208.25	10.17	20.4733	1.00943	2.79e-56	1.24e-55	yes	up
ENSSSCG00000007168	-	322	839.413	2.71333	6.55667	1.2729	7.99e-56	3.51e-55	yes	up
ENSSSCG00000007173	IDH3B	1123.46	3699.96	29.0467	90.2467	1.6355	2.62e-157	3.52e-156	yes	up
ENSSSCG00000007187	NSFL1C	1281.33	4694.67	11.1767	37.87	1.76057	1.01e-143	1.21e-142	yes	up
ENSSSCG00000007188	-	10476.3	4414	157.477	61.4433	-1.35781	1.89e-95	1.35e-94	yes	down
ENSSSCG00000007189	SDCBP2	26.3333	71.6667	0.206667	0.676667	1.71114	1.27e-10	2.48e-10	yes	up
ENSSSCG00000007211	ZCCHC3	34.6667	285.333	1.14	8.95333	2.97339	3.24e-63	1.57e-62	yes	up
ENSSSCG00000007232	DUSP15	133	313	1.5	3.29667	1.13605	1.46e-22	3.8e-22	yes	up
ENSSSCG00000007235	TPX2	723	277.337	9.97333	3.60667	-1.46741	1.39e-43	5.14e-43	yes	down
ENSSSCG00000007237	PDRG1	625	1964	7.51333	21.93	1.54538	5.6e-117	5.1e-116	yes	up
ENSSSCG00000007238	XKR7	0	8.66667	0.001	0.186667	7.54432	1.84e-07	3.25e-07	yes	up
ENSSSCG00000007239	CCM2L	35	210.667	0.256667	1.44667	2.49476	2.33e-47	9.16e-47	yes	up
ENSSSCG00000007248	ASXL1	1135	2421	7.99	16.0467	1.00601	2.66e-50	1.09e-49	yes	up
ENSSSCG00000007253	-	5139.67	2528.67	79.1167	39.1267	-1.01583	4.72e-69	2.48e-68	yes	down
ENSSSCG00000007264	-	967.667	2000.33	14.6233	29.5533	1.01505	3.43e-44	1.28e-43	yes	up
ENSSSCG00000007277	ASIP	0	10.3333	0.001	0.533333	9.05889	3.05e-08	5.53e-08	yes	up
ENSSSCG00000007278	AHCY	1204.33	5720.33	18.9167	100.303	2.40664	1.48e-214	3.44e-213	yes	up
ENSSSCG00000007280	ITCH	1489.33	566	12.3367	5.45	-1.17862	4.09e-60	1.91e-59	yes	down
ENSSSCG00000007287	GSS	1143	5106	22.0867	91.7033	2.0538	5.18e-266	1.83e-264	yes	up
ENSSSCG00000007291	EDEM2	729	358	15.4967	7.09667	-1.12674	1.16e-40	4.11e-40	yes	down
ENSSSCG00000007304	-	34.7267	86.7167	0.163333	0.38	1.21818	6.91e-11	1.36e-10	yes	up
ENSSSCG00000007306	CPNE1	1788.93	9991.97	34.8333	188.777	2.43814	0	0	yes	up
ENSSSCG00000007313	CNBD2	1.33333	6	0.03	0.13	2.11548	0.00723827	0.0102144	yes	up
ENSSSCG00000007314	-	3612.33	1283.33	26.4167	9.70333	-1.4449	5.29e-110	4.45e-109	yes	down
ENSSSCG00000007315	AAR2	652.333	3616.33	6.00333	30.7133	2.35503	8.25e-249	2.53e-247	yes	up
ENSSSCG00000007322	-	1073	563	16.5267	8.00333	-1.04612	9.75e-39	3.36e-38	yes	down
ENSSSCG00000007323	DSN1	80.3333	223.333	1.31333	3.41333	1.37795	2.44e-24	6.54e-24	yes	up
ENSSSCG00000007324	SOGA1	318	1506.33	2.59333	11.4	2.13615	3.44e-154	4.48e-153	yes	up
ENSSSCG00000007334	SRC	863.333	3019	10.1433	36.8933	1.86283	1.44e-157	1.93e-156	yes	up
ENSSSCG00000007338	VSTM2L	5.66667	2	0.0733333	0.02	-1.87447	0.027498	0.0369086	yes	down
ENSSSCG00000007340	TTI1	272	617	3.46	7.34333	1.08566	2.27e-30	6.82e-30	yes	up
ENSSSCG00000007344	-	1622.33	369	15.4667	3.23667	-2.25658	3.46e-168	5.15e-167	yes	down
ENSSSCG00000007348	SLC32A1	0.333333	7	0.00333333	0.0866667	4.70044	2.95e-05	4.77e-05	yes	up
ENSSSCG00000007349	ACTR5	190	900.333	2.05333	9.02667	2.13623	5.27e-118	4.86e-117	yes	up
ENSSSCG00000007350	PPP1R16B	42.3333	231.333	0.323333	1.84667	2.51383	1.25e-41	4.49e-41	yes	up
ENSSSCG00000007352	DHX35	198.667	482.667	2.46333	5.46667	1.15005	1.17e-30	3.52e-30	yes	up
ENSSSCG00000007355	TOP1	1739	656.333	19.0533	6.56667	-1.53681	2.89e-67	1.49e-66	yes	down
ENSSSCG00000007356	PLCG1	1203.33	5743	7.85333	34.8133	2.14826	5.01e-254	1.59e-252	yes	up
ENSSSCG00000007358	EMILIN3	13.6667	115.333	0.23	1.83333	2.99476	7.02e-44	2.62e-43	yes	up
ENSSSCG00000007369	-	735.667	130.667	17.3133	2.86333	-2.59612	1.47e-101	1.13e-100	yes	down
ENSSSCG00000007370	-	0	2.33333	0.001	0.123333	6.94642	0.0292074	0.0391287	yes	up
ENSSSCG00000007373	GDAP1L1	72.6667	1326.67	1.37	22.65	4.04726	1.33e-267	4.75e-266	yes	up
ENSSSCG00000007377	KCNK15	2.33333	21	0.1	0.803333	3.006	7.66e-09	1.42e-08	yes	up
ENSSSCG00000007383	TOMM34	251.667	744.333	4.69667	13.1167	1.48169	2.41e-43	8.89e-43	yes	up
ENSSSCG00000007385	KCNS1	14.6667	50	0.166667	0.533333	1.67807	5.85e-11	1.15e-10	yes	up
ENSSSCG00000007391	MATN4	7	41.6667	0.116667	0.633333	2.44057	3.11e-15	6.89e-15	yes	up
ENSSSCG00000007395	SYS1-DBNDD2	1332.84	4204.25	24.7833	72.29	1.54443	3.28e-77	1.9e-76	yes	up
ENSSSCG00000007422	DNTTIP1	481	1099.67	15.4433	32.6267	1.07907	6.9e-24	1.84e-23	yes	up
ENSSSCG00000007424	TNNC2	11.3333	4.33333	0.59	0.16	-1.88264	0.00730156	0.010302	yes	down
ENSSSCG00000007425	SNX21	492.647	1952.95	9.12667	33.6233	1.8813	3.44e-142	4.05e-141	yes	up
ENSSSCG00000007427	ZSWIM3	79	301.333	0.82	2.91667	1.83062	3.43e-38	1.17e-37	yes	up
ENSSSCG00000007431	CTSA	8803.81	2354.15	178.723	44.3967	-2.0092	1.15e-234	3.14e-233	yes	down
ENSSSCG00000007432	ZNF335	572.333	4017.82	4.88	31.77	2.70271	0	0	yes	up
ENSSSCG00000007433	PCIF1	551	1803.18	8.22333	26.3433	1.67964	9.72e-111	8.21e-110	yes	up
ENSSSCG00000007435	-	2491.18	10023.7	42.2467	158.653	1.90897	4.17e-190	7.72e-189	yes	up
ENSSSCG00000007437	SLC12A5	130.11	381.67	0.806667	2.21333	1.45618	2.25e-33	7.12e-33	yes	up
ENSSSCG00000007438	NCOA5	599.557	2118.33	7.38667	24.3267	1.71954	1.68e-131	1.78e-130	yes	up
ENSSSCG00000007439	CDH22	106.667	238.333	0.57	1.17667	1.04567	3.89e-19	9.38e-19	yes	up
ENSSSCG00000007454	-	584.163	1640.38	5.15333	13.5	1.38938	3.56e-93	2.51e-92	yes	up
ENSSSCG00000007462	KCNB1	27.3333	7.66667	0.333333	0.09	-1.88897	1.84e-08	3.38e-08	yes	down
ENSSSCG00000007463	PTGIS	4560.33	1236	35.3167	8.94333	-1.98146	5.38e-203	1.14e-201	yes	down
ENSSSCG00000007466	SLC9A8	194	768.333	2.13	7.83	1.87816	1.25e-66	6.36e-66	yes	up
ENSSSCG00000007475	MOCS3	264.667	855.333	3.83333	11.6867	1.60819	4.49e-53	1.91e-52	yes	up
ENSSSCG00000007476	KCNG1	11	310.667	0.0766667	1.95333	4.67119	8.14e-124	8.05e-123	yes	up
ENSSSCG00000007477	NFATC2	218	520.333	1.27333	2.78	1.12647	9.71e-26	2.68e-25	yes	up
ENSSSCG00000007487	PFDN4	369.333	179	10.44	4.63333	-1.172	2.02e-13	4.25e-13	yes	down
ENSSSCG00000007488	DOK5	1.33333	6	0.0266667	0.123333	2.20945	0.0195087	0.0265702	yes	up
ENSSSCG00000007492	FAM210B	551.747	223.217	14.3467	6.01667	-1.25368	8.53e-44	3.17e-43	yes	down
ENSSSCG00000007494	CSTF1	564.787	1293.52	5.91667	12.5933	1.0898	9.14e-48	3.61e-47	yes	up
ENSSSCG00000007495	-	0.666667	5.33333	0.00666667	0.0466667	2.80735	0.00735903	0.0103805	yes	up
ENSSSCG00000007499	TFAP2C	0	18.3333	0.001	0.196667	7.61961	2.45e-14	5.3e-14	yes	up
ENSSSCG00000007501	BMP7	0	5.33333	0.001	0.0566667	5.82443	6.39e-05	0.000101626	yes	up
ENSSSCG00000007503	RAE1	825.333	4081.33	11.6467	52.5233	2.17304	6.84e-259	2.26e-257	yes	up
ENSSSCG00000007504	RBM38	174.667	2875.67	3.22333	49.4267	3.93866	0	0	yes	up
ENSSSCG00000007508	ZBP1	189.667	1788	5.48667	48.2633	3.13693	8.96e-256	2.88e-254	yes	up
ENSSSCG00000007512	-	4.66667	11	0.0633333	0.15	1.24393	0.0274479	0.0368442	yes	up
ENSSSCG00000007513	RAB22A	1355	3119.67	20.6933	46.5433	1.16941	1.7e-74	9.53e-74	yes	up
ENSSSCG00000007516	-	1411.28	3649.25	14.2	33.01	1.21701	2.38e-99	1.79e-98	yes	up
ENSSSCG00000007523	TUBB1	15.6667	51.3333	0.176667	0.546667	1.62963	1.15e-08	2.11e-08	yes	up
ENSSSCG00000007528	PHACTR3	0.666667	5.66667	0.02	0.1	2.32193	0.0020812	0.0030415	yes	up
ENSSSCG00000007529	SYCP2	87	1.33333	0.88	0.0166667	-5.72247	3.33e-61	1.57e-60	yes	down
ENSSSCG00000007538	GATA5	0	5.66667	0.001	0.17	7.40939	0.000668011	0.00100787	yes	up
ENSSSCG00000007540	CABLES2	286.667	1093.33	2.55	8.95	1.81139	3.12e-88	2.08e-87	yes	up
ENSSSCG00000007542	PRKAR1B	135.667	539.333	2.32667	8.59333	1.88495	7.33e-53	3.11e-52	yes	up
ENSSSCG00000007543	DNAAF5	348	968.333	4.41667	11.42	1.37053	2.96e-64	1.45e-63	yes	up
ENSSSCG00000007554	ZFAND2A	411.333	2451.33	10.9733	60.24	2.45672	9.09e-182	1.53e-180	yes	up
ENSSSCG00000007556	PSMG3	159	2911.67	5.86	106.743	4.1871	0	0	yes	up
ENSSSCG00000007557	MICALL2	468.667	1669	2.79333	9.21	1.72121	8.74e-97	6.35e-96	yes	up
ENSSSCG00000007558	INTS1	2212.33	6417.33	12.61	33.9633	1.42941	2.77e-129	2.87e-128	yes	up
ENSSSCG00000007559	MAFK	201.333	611.333	16.1767	45.9233	1.50531	1.29e-50	5.32e-50	yes	up
ENSSSCG00000007563	BRAT1	204	1710	2.87667	22.2967	2.95436	1.68e-233	4.52e-232	yes	up
ENSSSCG00000007572	LFNG	96.3333	415	1.74667	6.94	1.99033	2.49e-58	1.13e-57	yes	up
ENSSSCG00000007574	SDK1	35	181.667	0.233333	1.14667	2.29698	8.38e-38	2.85e-37	yes	up
ENSSSCG00000007575	RADIL	11.1767	40.4133	0.09	0.316667	1.81497	1.69e-09	3.2e-09	yes	up
ENSSSCG00000007576	FOXK1	1602.33	7594.33	9.35333	41.1467	2.13722	8.7e-298	4e-296	yes	up
ENSSSCG00000007577	AP5Z1	1085.16	2770.92	7.38333	17.41	1.23757	2.62e-62	1.25e-61	yes	up
ENSSSCG00000007580	WIPI2	1595	3675.33	24.9467	50.1867	1.00846	5.13e-65	2.54e-64	yes	up
ENSSSCG00000007589	-	1.66667	12.0133	0.0266667	0.176667	2.72792	1.94e-05	3.15e-05	yes	up
ENSSSCG00000007590	PMS2	280.333	693	3.02667	6.96667	1.20274	8.21e-39	2.83e-38	yes	up
ENSSSCG00000007593	-	67.7133	453.76	1.48333	9.08	2.61385	6.04e-25	1.64e-24	yes	up
ENSSSCG00000007601	TECPR1	348	1207	4.33667	14.1467	1.7058	1.06e-84	6.77e-84	yes	up
ENSSSCG00000007602	BAIAP2L1	1	60	0.0133333	0.936667	6.13443	4.78e-34	1.53e-33	yes	up
ENSSSCG00000007603	NPTX2	13.6667	240	0.203333	3.34667	4.04081	1.65e-85	1.06e-84	yes	up
ENSSSCG00000007606	TRRAP	2055.67	5172.67	6.97	16.28	1.22387	4.33e-84	2.73e-83	yes	up
ENSSSCG00000007622	-	417.233	1481.18	4.56	16.3067	1.83836	1.61e-109	1.34e-108	yes	up
ENSSSCG00000007637	TRIM4	751	2636	4.28333	14.0833	1.71718	2.05e-159	2.81e-158	yes	up
ENSSSCG00000007647	C7orf43	397.213	1743.86	3.17333	12.9133	2.02479	3.69e-165	5.34e-164	yes	up
ENSSSCG00000007648	GAL3ST4	257.667	127	4.43667	2.05	-1.11385	8.6e-16	1.93e-15	yes	down
ENSSSCG00000007650	STAG3	8.66667	23.3333	0.103333	0.243333	1.23563	0.00193815	0.00283931	yes	up
ENSSSCG00000007665	-	10	46.3333	0.156667	0.67	2.09646	2.97e-13	6.23e-13	yes	up
ENSSSCG00000007667	LRCH4	945	2118	12.4533	26.1433	1.06991	1.14e-56	5.07e-56	yes	up
ENSSSCG00000007668	GIGYF1	630	1664.67	5.38	14.0133	1.38112	4.68e-70	2.49e-69	yes	up
ENSSSCG00000007669	GNB2	4614.67	12153.7	60.2633	146.99	1.28637	7.54e-75	4.25e-74	yes	up
ENSSSCG00000007672	POP7	523.333	1232.33	15.9367	34.5167	1.11494	5.04e-33	1.58e-32	yes	up
ENSSSCG00000007679	IFT22	276.333	62.3333	5.45333	1.15333	-2.24133	3.56e-56	1.57e-55	yes	down
ENSSSCG00000007682	SH2B2	36.3333	327.333	0.786667	6.50667	3.04809	1.76e-87	1.16e-86	yes	up
ENSSSCG00000007687	LRWD1	370.377	956.39	6.70333	16.0967	1.26381	2.61e-51	1.08e-50	yes	up
ENSSSCG00000007688	POLR2J	836.957	2692.28	52.86	157.447	1.57461	9.44e-117	8.58e-116	yes	up
ENSSSCG00000007704	NSUN5	330.617	2199.32	4.56	32.38	2.828	1.25e-243	3.7e-242	yes	up
ENSSSCG00000007705	-	364.383	1478.34	2.72	10.6667	1.97143	8.9e-118	8.18e-117	yes	up
ENSSSCG00000007708	-	407.083	1930.23	9.43333	41.6933	2.14398	1.08e-195	2.12e-194	yes	up
ENSSSCG00000007710	MLXIPL	2.66667	18.3333	0.0333333	0.196667	2.56071	3.33e-07	5.82e-07	yes	up
ENSSSCG00000007713	BUD23	2086.33	5941.33	66.2333	174.583	1.39829	3.96e-98	2.93e-97	yes	up
ENSSSCG00000007718	CLDN4	2.66667	16.8133	0.0666667	0.363333	2.44626	8.64e-07	1.49e-06	yes	up
ENSSSCG00000007719	-	1960	7093	15.1367	53.4833	1.82104	6.67e-195	1.3e-193	yes	up
ENSSSCG00000007722	NCF1	6	20.3333	0.156667	0.503333	1.68382	4.72e-05	7.56e-05	yes	up
ENSSSCG00000007723	RCC1L	512.333	2880.33	3.38	17.7333	2.39137	1.59e-280	6.27e-279	yes	up
ENSSSCG00000007728	-	3.33333	34.6667	0.133333	1.30667	3.29278	3.36e-15	7.43e-15	yes	up
ENSSSCG00000007733	-	378.333	897.667	4.07667	9.9	1.28004	2.65e-34	8.49e-34	yes	up
ENSSSCG00000007737	TPST1	3339	940.667	65.76	17.27	-1.92894	5.18e-193	9.91e-192	yes	down
ENSSSCG00000007739	GUSB	5239.33	2562.33	69.47	31.7067	-1.1316	2.92e-71	1.57e-70	yes	down
ENSSSCG00000007748	PSPH	1041.33	328.667	28.0867	8.58333	-1.71028	3.16e-100	2.39e-99	yes	down
ENSSSCG00000007753	-	352.62	1413.18	3.15333	11.7633	1.89935	3.02e-109	2.51e-108	yes	up
ENSSSCG00000007754	ITGAX	18.3333	62	0.156667	0.446667	1.5115	1.12e-12	2.31e-12	yes	up
ENSSSCG00000007765	PRSS53	36.3967	145.99	0.28	1.02	1.86507	1.03e-19	2.53e-19	yes	up
ENSSSCG00000007767	ZNF668	177.123	1212.66	2.87	18.25	2.66877	1.84e-167	2.71e-166	yes	up
ENSSSCG00000007770	ORAI3	2215.67	7118	41.42	123.447	1.57549	2.47e-144	2.97e-143	yes	up
ENSSSCG00000007772	STX1A	13.6667	134	0.606667	5.88	3.27684	1.24e-38	4.28e-38	yes	up
ENSSSCG00000007774	CTF1	0	6.33333	0.001	0.4	8.64386	1.62e-05	2.65e-05	yes	up
ENSSSCG00000007776	-	272	593.333	11.5367	23.4033	1.02049	1.84e-27	5.25e-27	yes	up
ENSSSCG00000007778	-	5.03333	26.1867	0.156667	0.706667	2.17333	3.9e-07	6.79e-07	yes	up
ENSSSCG00000007780	ZNF629	851	2834.33	5.44333	16.93	1.63702	1.47e-138	1.67e-137	yes	up
ENSSSCG00000007782	SETD1A	621.333	2174.67	4.46333	14.6167	1.71142	7.24e-115	6.41e-114	yes	up
ENSSSCG00000007786	RNF40	1833.97	7896.81	12.0667	48.1633	1.99691	1.73e-246	5.21e-245	yes	up
ENSSSCG00000007788	PHKG2	642.333	1421.67	11.6367	23.73	1.02803	3.38e-37	1.14e-36	yes	up
ENSSSCG00000007789	-	1272.7	5177.77	4.96	19.0267	1.93961	2.92e-100	2.22e-99	yes	up
ENSSSCG00000007795	-	1553.33	3831.32	21.36	49.0567	1.19954	6.76e-93	4.74e-92	yes	up
ENSSSCG00000007798	TBC1D10B	1964	7431.67	24.7033	81.8567	1.72839	6.33e-130	6.6e-129	yes	up
ENSSSCG00000007801	ZNF48	171.667	1074.33	2.47667	14.5333	2.55289	1.19e-149	1.5e-148	yes	up
ENSSSCG00000007803	TUFM	2089	7191.67	46.38	148.74	1.68122	9.56e-171	1.46e-169	yes	up
ENSSSCG00000007804	SH2B1	320.333	1151.67	5.97	19.9067	1.73745	5.47e-93	3.84e-92	yes	up
ENSSSCG00000007805	ATP2A1	7.24667	28.66	0.05	0.193333	1.95109	0.00022783	0.000352464	yes	up
ENSSSCG00000007806	RABEP2	589.087	1584.01	11.15	28.09	1.33301	2.97e-69	1.57e-68	yes	up
ENSSSCG00000007807	CD19	6.66667	1.66667	0.0566667	0.0133333	-2.08746	0.00786542	0.0110617	yes	down
ENSSSCG00000007808	NFATC2IP	485.667	1486	5.07333	17.9967	1.82672	1.74e-95	1.25e-94	yes	up
ENSSSCG00000007812	XPO6	3480.33	7634.33	31.0567	63.3567	1.02859	6.52e-77	3.77e-76	yes	up
ENSSSCG00000007814	-	293.333	623.667	1.82	3.8	1.06206	2.31e-24	6.21e-24	yes	up
ENSSSCG00000007815	GTF3C1	2115.67	6178	8.39	22.74	1.43849	1.28e-139	1.47e-138	yes	up
ENSSSCG00000007816	IL21R	24.3333	169.333	0.306667	1.78	2.53713	1.08e-41	3.89e-41	yes	up
ENSSSCG00000007817	IL4R	2393.67	13745.7	23.5833	128.983	2.45135	0	0	yes	up
ENSSSCG00000007818	KDM8	189	1017.67	3.44667	17.5567	2.34875	3.52e-146	4.29e-145	yes	up
ENSSSCG00000007823	ZKSCAN2	87	562	0.886667	5.46	2.62244	3.97e-93	2.79e-92	yes	up
ENSSSCG00000007840	POLR3E	555	3102.33	5.77333	32.8967	2.51046	4.99e-250	1.54e-248	yes	up
ENSSSCG00000007842	SDR42E2	2.66667	12	0.0633333	0.26	2.03747	0.000242291	0.000373982	yes	up
ENSSSCG00000007853	LYRM1	334	164.333	8.72	4.02	-1.11713	1.36e-22	3.54e-22	yes	down
ENSSSCG00000007873	ABCC6	8.33333	2.33333	0.09	0.0333333	-1.43296	0.00242215	0.00352609	yes	down
ENSSSCG00000007919	-	189.98	465.403	2.26667	5.12333	1.17651	2.78e-26	7.75e-26	yes	up
ENSSSCG00000007920	-	182.687	874.597	3.07667	13.8733	2.17287	4.49e-105	3.58e-104	yes	up
ENSSSCG00000007927	PPL	4	200.667	0.0233333	1.23333	5.72403	1.84e-109	1.54e-108	yes	up
ENSSSCG00000007930	MGRN1	2020.61	4738.9	24.41	50.91	1.06048	4.36e-74	2.42e-73	yes	up
ENSSSCG00000007939	-	297.39	1055.81	3.36667	11.56	1.77975	6.27e-87	4.11e-86	yes	up
ENSSSCG00000007941	CDIP1	489.473	1309.16	6.44333	16.69	1.3731	2.44e-35	7.96e-35	yes	up
ENSSSCG00000007942	HMOX2	1805.86	4999.51	16.9367	45.0133	1.4102	9.24e-121	8.75e-120	yes	up
ENSSSCG00000007943	NMRAL1	631.333	2521	5.77	21.3967	1.89074	8.67e-139	9.86e-138	yes	up
ENSSSCG00000007944	-	635.843	1945.23	5.29	15.09	1.51225	1.12e-106	9.12e-106	yes	up
ENSSSCG00000007947	-	240.503	711.203	14.5333	39.99	1.46027	7.03e-44	2.62e-43	yes	up
ENSSSCG00000007949	SRL	10.6667	57.3333	0.0966667	0.466667	2.2713	2.31e-14	5.01e-14	yes	up
ENSSSCG00000007950	ADCY9	783.667	1963.67	6.05	14.1933	1.23021	2.53e-73	1.4e-72	yes	up
ENSSSCG00000007951	CREBBP	1302.33	4745.33	6.37333	21.7267	1.76935	1.98e-157	2.66e-156	yes	up
ENSSSCG00000007952	TRAP1	1806.99	5294.99	27.2133	74.36	1.45021	8.29e-124	8.19e-123	yes	up
ENSSSCG00000007954	SLX4	208.073	1016.98	1.33	6.11	2.19975	2.46e-123	2.41e-122	yes	up
ENSSSCG00000007958	ZNF174	334	1213.33	2.89333	9.79333	1.75907	1.54e-118	1.43e-117	yes	up
ENSSSCG00000007962	SNRNP25	520.003	1287.53	26.4733	60.8533	1.2008	1.24e-47	4.87e-47	yes	up
ENSSSCG00000007963	ZNF263	120	1456.33	1.62333	17.92	3.46454	8.1e-205	1.72e-203	yes	up
ENSSSCG00000007965	ZNF200	159	315.333	1.4	2.95333	1.07692	9.02e-12	1.82e-11	yes	up
ENSSSCG00000007968	RHBDF1	810.503	2336.28	12.0267	30.78	1.35576	2.09e-89	1.41e-88	yes	up
ENSSSCG00000007970	-	1007.5	3212.53	12.28	36.3767	1.5667	3.04e-111	2.58e-110	yes	up
ENSSSCG00000007977	HBM	0	5.33333	0.001	0.35	8.45121	0.000359302	0.000549637	yes	up
ENSSSCG00000007978	-	43.6667	11.6667	1.91667	0.486667	-1.97759	3.07e-09	5.76e-09	yes	down
ENSSSCG00000007979	LUC7L	665.667	3379.67	11.5833	50.66	2.1288	1.76e-165	2.55e-164	yes	up
ENSSSCG00000007980	-	1460.67	465	19.0733	5.64667	-1.75609	2.39e-85	1.53e-84	yes	down
ENSSSCG00000007982	MPG	335.667	1365.67	10.94	39.1067	1.8378	2.54e-107	2.08e-106	yes	up
ENSSSCG00000007984	MRPL28	4227.01	12619.3	118.597	319.583	1.43013	1.25e-101	9.64e-101	yes	up
ENSSSCG00000007992	PIGQ	544	2199	7.18667	26.9	1.90421	4.25e-121	4.05e-120	yes	up
ENSSSCG00000007993	CAPN15	876.667	6126.33	7.63	49.44	2.69592	0	0	yes	up
ENSSSCG00000007995	MCRIP2	166	403.667	7.58	16.9633	1.16215	1.99e-26	5.57e-26	yes	up
ENSSSCG00000007997	RHOT2	309.333	1359	6.81667	27.8167	2.02881	1.36e-107	1.12e-106	yes	up
ENSSSCG00000007998	RHBDL1	142.36	75.33	2.20333	1.09	-1.01536	6.13e-11	1.21e-10	yes	down
ENSSSCG00000008002	NARFL	401.387	1888.57	3.17333	13.86	2.12686	1.14e-173	1.79e-172	yes	up
ENSSSCG00000008004	FAM173A	1055.36	2346	6.06	12.4267	1.03605	2.7e-36	8.94e-36	yes	up
[truncated: 6,218 more rows]
