# Supplementary material for: Mechanism of Apoptosis in Porcine Ovarian Granulosa Cells Triggered by T-2 Toxin
Source: Genes (Basel). 2024 May 1;15(5):579. doi: 10.3390/genes15050579 (PMC11120908; doi:10.3390/genes15050579)
Supplement: Supplementary file 1 [file genes-15-00579-s001.zip › Table S4.xlsx]

## Sheet: Sheet1
Table S4. Significant GO terms enriched from DEGs
Type	GO ID	Descprition	Gene number	P adjust
Biological Process	GO:0071840	cellular component organization or biogenesis	1961	4.48103e-52
Biological Process	GO:0016043	cellular component organization	1884	1.6183e-48
Biological Process	GO:0032502	developmental process	1907	1.06619e-43
Biological Process	GO:0048856	anatomical structure development	1808	4.72753e-41
Biological Process	GO:0008152	metabolic process	3656	2.1054e-33
Biological Process	GO:0044767	single-organism developmental process	1475	5.97964e-32
Biological Process	GO:0044085	cellular component biogenesis	1050	7.54612e-28
Biological Process	GO:0044237	cellular metabolic process	3179	2.17255e-24
Biological Process	GO:0022607	cellular component assembly	961	7.54632e-24
Biological Process	GO:0048869	cellular developmental process	1287	3.74153e-23
Biological Process	GO:0051179	localization	1831	2.22729e-22
Biological Process	GO:0030154	cell differentiation	1239	6.85173e-21
Biological Process	GO:0006996	organelle organization	976	1.15018e-18
Biological Process	GO:0009653	anatomical structure morphogenesis	657	1.63822e-18
Biological Process	GO:0007275	multicellular organism development	430	1.83323e-17
Biological Process	GO:0009790	embryo development	428	1.97074e-17
Biological Process	GO:0044707	single-multicellular organism process	430	5.02949e-17
Biological Process	GO:0007267	cell-cell signaling	472	1.03544e-16
Biological Process	GO:0006464	cellular protein modification process	1359	1.03544e-16
Biological Process	GO:0036211	protein modification process	1359	1.03544e-16
Biological Process	GO:0043412	macromolecule modification	1359	1.03544e-16
Biological Process	GO:0007049	cell cycle	547	1.00969e-15
Biological Process	GO:0006810	transport	1497	4.87184e-15
Biological Process	GO:0051234	establishment of localization	1497	5.30673e-15
Biological Process	GO:0006807	nitrogen compound metabolic process	2260	2.12662e-14
Biological Process	GO:0034641	cellular nitrogen compound metabolic process	2215	7.11335e-14
Biological Process	GO:0008219	cell death	622	8.68051e-14
Biological Process	GO:0016265	death	622	8.68051e-14
Biological Process	GO:0008283	cell proliferation	638	1.25418e-13
Biological Process	GO:0007155	cell adhesion	442	4.00823e-13
Biological Process	GO:0022610	biological adhesion	442	4.00823e-13
Biological Process	GO:0040011	locomotion	581	2.82414e-12
Biological Process	GO:0006950	response to stress	1050	2.91078e-12
Biological Process	GO:0044238	primary metabolic process	2387	5.58423e-12
Biological Process	GO:0071704	organic substance metabolic process	2387	6.54278e-12
Biological Process	GO:0048646	anatomical structure formation involved in morphogenesis	395	4.42719e-11
Biological Process	GO:0002376	immune system process	732	1.37467e-10
Biological Process	GO:0032989	cellular component morphogenesis	346	1.65302e-10
Biological Process	GO:0000902	cell morphogenesis	345	2.16934e-10
Biological Process	GO:0000278	mitotic cell cycle	302	3.00561e-10
Biological Process	GO:0051276	chromosome organization	411	6.77539e-10
Biological Process	GO:0009058	biosynthetic process	2000	1.48339e-09
Biological Process	GO:0065003	macromolecular complex assembly	555	2.55087e-09
Biological Process	GO:0006928	movement of cell or subcellular component	498	2.74501e-09
Biological Process	GO:0016192	vesicle-mediated transport	453	2.74501e-09
Biological Process	GO:0043933	macromolecular complex subunit organization	555	2.79635e-09
Biological Process	GO:0048870	cell motility	496	3.40449e-09
Biological Process	GO:0051674	localization of cell	496	3.40449e-09
Biological Process	GO:0043170	macromolecule metabolic process	1931	6.38243e-09
Biological Process	GO:0090304	nucleic acid metabolic process	520	1.2908e-08
Biological Process	GO:0007010	cytoskeleton organization	461	1.36101e-08
Biological Process	GO:0040007	growth	315	1.75048e-08
Biological Process	GO:0043062	extracellular structure organization	104	1.80606e-08
Biological Process	GO:0030198	extracellular matrix organization	103	2.8408e-08
Biological Process	GO:1901360	organic cyclic compound metabolic process	579	8.15882e-08
Biological Process	GO:0044260	cellular macromolecule metabolic process	1866	8.72175e-08
Biological Process	GO:0006139	nucleobase-containing compound metabolic process	578	9.27621e-08
Biological Process	GO:0006725	cellular aromatic compound metabolic process	578	9.27621e-08
Biological Process	GO:0046483	heterocycle metabolic process	578	9.27621e-08
Biological Process	GO:0006461	protein complex assembly	397	6.87447e-07
Biological Process	GO:0070271	protein complex biogenesis	397	6.87447e-07
Biological Process	GO:0071822	protein complex subunit organization	397	7.91557e-07
Biological Process	GO:0044765	single-organism transport	713	2.21923e-06
Biological Process	GO:1902578	single-organism localization	713	2.21923e-06
Biological Process	GO:0009056	catabolic process	699	5.62947e-06
Biological Process	GO:0044710	single-organism metabolic process	807	1.79151e-05
Biological Process	GO:0061024	membrane organization	286	2.00794e-05
Biological Process	GO:0051641	cellular localization	322	2.93414e-05
Biological Process	GO:0051649	establishment of localization in cell	322	2.93414e-05
Biological Process	GO:0046907	intracellular transport	321	3.56214e-05
Biological Process	GO:0019538	protein metabolic process	1594	4.14796e-05
Biological Process	GO:0022613	ribonucleoprotein complex biogenesis	173	4.14796e-05
Biological Process	GO:0006259	DNA metabolic process	316	4.61995e-05
Biological Process	GO:0006399	tRNA metabolic process	83	5.45638e-05
Biological Process	GO:0034660	ncRNA metabolic process	83	5.45638e-05
Biological Process	GO:0016070	RNA metabolic process	215	6.55459e-05
Biological Process	GO:0003013	circulatory system process	142	0.00010547
Biological Process	GO:0044281	small molecule metabolic process	602	0.00027785
Biological Process	GO:0007059	chromosome segregation	125	0.000323527
Biological Process	GO:0044267	cellular protein metabolic process	1527	0.000330544
Biological Process	GO:0042254	ribosome biogenesis	114	0.000333504
Biological Process	GO:1902582	single-organism intracellular transport	232	0.000464029
Biological Process	GO:0034330	cell junction organization	89	0.000500921
Biological Process	GO:0044403	symbiosis, encompassing mutualism through parasitism	123	0.000653339
Biological Process	GO:0044419	interspecies interaction between organisms	123	0.000653339
Biological Process	GO:0051704	multi-organism process	123	0.000653339
Biological Process	GO:0007568	aging	64	0.000750442
Biological Process	GO:0000003	reproduction	371	0.000762673
Biological Process	GO:0042592	homeostatic process	515	0.000800912
Biological Process	GO:0006629	lipid metabolic process	387	0.000868295
Biological Process	GO:0065008	regulation of biological quality	516	0.00107511
Biological Process	GO:0051604	protein maturation	98	0.00109773
Biological Process	GO:0006913	nucleocytoplasmic transport	156	0.00313041
Biological Process	GO:0016482	cytoplasmic transport	156	0.00313041
Biological Process	GO:0051169	nuclear transport	156	0.00313041
Biological Process	GO:0055085	transmembrane transport	510	0.00313041
Biological Process	GO:0007005	mitochondrion organization	171	0.00951486
Biological Process	GO:0030705	cytoskeleton-dependent intracellular transport	54	0.0100696
Biological Process	GO:0021700	developmental maturation	99	0.0187263
Biological Process	GO:0006605	protein targeting	154	0.0363017
Biological Process	GO:0006886	intracellular protein transport	154	0.0363017
Biological Process	GO:0008104	protein localization	154	0.0363017
Biological Process	GO:0015031	protein transport	154	0.0363017
Biological Process	GO:0033036	macromolecule localization	154	0.0363017
Biological Process	GO:0034613	cellular protein localization	154	0.0363017
Biological Process	GO:0045184	establishment of protein localization	154	0.0363017
Biological Process	GO:0070727	cellular macromolecule localization	154	0.0363017
Biological Process	GO:0071702	organic substance transport	154	0.0363017
Cellular Component	GO:0005622	intracellular	5036	6.19e-125
Cellular Component	GO:0044424	intracellular part	4730	2.39e-112
Cellular Component	GO:0043227	membrane-bounded organelle	3578	1.66e-93
Cellular Component	GO:0043231	intracellular membrane-bounded organelle	3576	2.18e-93
Cellular Component	GO:0043226	organelle	4222	5.23e-81
Cellular Component	GO:0043229	intracellular organelle	4088	7.78e-77
Cellular Component	GO:0005737	cytoplasm	3498	4.65e-61
Cellular Component	GO:0005634	nucleus	2369	1.75e-51
Cellular Component	GO:0044422	organelle part	1659	3.06e-47
Cellular Component	GO:0044446	intracellular organelle part	1658	3.84e-47
Cellular Component	GO:0031974	membrane-enclosed lumen	1396	1.55e-40
Cellular Component	GO:0031981	nuclear lumen	1396	1.55e-40
Cellular Component	GO:0043233	organelle lumen	1396	1.55e-40
Cellular Component	GO:0070013	intracellular organelle lumen	1396	1.55e-40
Cellular Component	GO:0044428	nuclear part	1476	2.75e-40
Cellular Component	GO:0005654	nucleoplasm	1086	1.09e-31
Cellular Component	GO:0044444	cytoplasmic part	2484	8.26e-27
Cellular Component	GO:0012505	endomembrane system	1016	5.14e-19
Cellular Component	GO:0005829	cytosol	1104	2.59e-18
Cellular Component	GO:0044464	cell part	5570	2.03e-16
Cellular Component	GO:0005623	cell	5639	1.6e-15
Cellular Component	GO:0005730	nucleolus	357	2.16e-14
Cellular Component	GO:0005856	cytoskeleton	713	1.9e-13
Cellular Component	GO:0043234	protein complex	1032	6.77e-13
Cellular Component	GO:0043228	non-membrane-bounded organelle	1394	1.76e-10
Cellular Component	GO:0043232	intracellular non-membrane-bounded organelle	1394	1.76e-10
Cellular Component	GO:0005694	chromosome	376	1.68e-09
Cellular Component	GO:0015630	microtubule cytoskeleton	263	3.42e-08
Cellular Component	GO:0044430	cytoskeletal part	263	3.42e-08
Cellular Component	GO:0005794	Golgi apparatus	407	4.28e-08
Cellular Component	GO:0005815	microtubule organizing center	262	4.28e-08
Cellular Component	GO:0005739	mitochondrion	606	1.07e-07
Cellular Component	GO:0005783	endoplasmic reticulum	424	1.86e-06
Cellular Component	GO:0031012	extracellular matrix	118	5.79e-06
Cellular Component	GO:0005578	proteinaceous extracellular matrix	116	1.14e-05
Cellular Component	GO:0042995	cell projection	189	2.01e-05
Cellular Component	GO:0000228	nuclear chromosome	209	2.36e-05
Cellular Component	GO:0005929	cilium	185	4.5e-05
Cellular Component	GO:0005768	endosome	225	4.58e-05
Cellular Component	GO:0031982	vesicle	430	0.000101489
Cellular Component	GO:0031410	cytoplasmic vesicle	425	0.000179706
Cellular Component	GO:0005773	vacuole	147	0.00289431
Cellular Component	GO:0000323	lytic vacuole	111	0.00780305
Cellular Component	GO:0005764	lysosome	111	0.00780305
Cellular Component	GO:0044421	extracellular region part	428	0.00962963
Cellular Component	GO:0005777	peroxisome	44	0.0178653
Cellular Component	GO:0042579	microbody	44	0.0178653
Cellular Component	GO:0005635	nuclear envelope	131	0.0178653
Cellular Component	GO:0031967	organelle envelope	131	0.0178653
Cellular Component	GO:0031975	envelope	131	0.0178653
Cellular Component	GO:0005615	extracellular space	381	0.0246663
Molecular Function	GO:0005488	binding	3617	1.41e-88
Molecular Function	GO:0005515	protein binding	1290	3.87e-34
Molecular Function	GO:0043167	ion binding	2036	9.2e-34
Molecular Function	GO:0019899	enzyme binding	777	2.38e-22
Molecular Function	GO:0003824	catalytic activity	1887	1.53e-16
Molecular Function	GO:0097159	organic cyclic compound binding	1097	6.77e-14
Molecular Function	GO:1901363	heterocyclic compound binding	1097	6.77e-14
Molecular Function	GO:0003676	nucleic acid binding	1094	1.11e-13
Molecular Function	GO:0003677	DNA binding	751	1.46e-12
Molecular Function	GO:0016740	transferase activity	693	5.71e-08
Molecular Function	GO:0016772	transferase activity, transferring phosphorus-containing groups	396	1.87e-07
Molecular Function	GO:0016301	kinase activity	348	1.87e-07
Molecular Function	GO:0003700	transcription factor activity, sequence-specific DNA binding	434	1.18e-06
Molecular Function	GO:0001071	nucleic acid binding transcription factor activity	434	1.25e-06
Molecular Function	GO:0008092	cytoskeletal protein binding	335	1.25e-06
Molecular Function	GO:0016787	hydrolase activity	794	9.35e-06
Molecular Function	GO:0017111	nucleoside-triphosphatase activity	301	9.26e-05
Molecular Function	GO:0016462	pyrophosphatase activity	301	9.26e-05
Molecular Function	GO:0016817	hydrolase activity, acting on acid anhydrides	301	9.26e-05
Molecular Function	GO:0016818	hydrolase activity, acting on acid anhydrides, in phosphorus-containing anhydrides	301	9.26e-05
Molecular Function	GO:0008289	lipid binding	216	0.000959873
Molecular Function	GO:0030234	enzyme regulator activity	315	0.00165814
Molecular Function	GO:0098772	molecular function regulator	315	0.00177463
Molecular Function	GO:0008168	methyltransferase activity	89	0.00272216
Molecular Function	GO:0016741	transferase activity, transferring one-carbon groups	89	0.00272216
Molecular Function	GO:0016887	ATPase activity	178	0.00272216
Molecular Function	GO:0008134	transcription factor binding	200	0.00272216
Molecular Function	GO:0000988	transcription factor activity, protein binding	183	0.00379728
Molecular Function	GO:0004386	helicase activity	53	0.00455474
Molecular Function	GO:0003723	RNA binding	388	0.00786235
Molecular Function	GO:0005215	transporter activity	440	0.0079039
Molecular Function	GO:0016810	hydrolase activity, acting on carbon-nitrogen (but not peptide) bonds	57	0.0115663
Molecular Function	GO:0030674	protein binding, bridging	46	0.0115663
Molecular Function	GO:0060090	binding, bridging	46	0.0115663
Molecular Function	GO:0022857	transmembrane transporter activity	412	0.0117
Molecular Function	GO:0003924	GTPase activity	115	0.0302458
Molecular Function	GO:0016491	oxidoreductase activity	288	0.0413358
Molecular Function	GO:0051082	unfolded protein binding	37	0.0459774
