# Supplementary material for: Mechanism of Apoptosis in Porcine Ovarian Granulosa Cells Triggered by T-2 Toxin
Source: Genes (Basel). 2024 May 1;15(5):579. doi: 10.3390/genes15050579 (PMC11120908; doi:10.3390/genes15050579)
Supplement: Supplementary file 1 [file genes-15-00579-s001.zip › Table S5.xlsx]

## Sheet: Sheet1
Table S5. Significant pathways enriched from DEGs
KO IDs	Pathway	Gene number	Q-value
ko04151	PI3K-Akt signaling pathway	165	0.00461324
ko04722	Neurotrophin signaling pathway	68	0.00461324
ko04014	Ras signaling pathway	117	0.00497957
ko04010	MAPK signaling pathway	143	0.00916964
ko04144	Endocytosis	120	0.00916964
ko04390	Hippo signaling pathway	81	0.0118955
ko04022	cGMP - PKG signaling pathway	84	0.0207191
ko04510	Focal adhesion	94	0.0207191
ko04211	Longevity regulating pathway - mammal	50	0.021146
ko04015	Rap1 signaling pathway	102	0.021146
ko04725	Cholinergic synapse	61	0.021146
ko04550	Signaling pathways regulating pluripotency of stem cells	69	0.021146
ko04210	Apoptosis	70	0.0239419
ko04371	Apelin signaling pathway	69	0.0239419
ko04360	Axon guidance	88	0.0339215
ko04910	Insulin signaling pathway	69	0.0339215
ko04072	Phospholipase D signaling pathway	75	0.0339215
ko04668	TNF signaling pathway	55	0.0406507
ko04512	ECM-receptor interaction	41	0.0420196
ko04810	Regulation of actin cytoskeleton	96	0.0420196
ko04024	cAMP signaling pathway	95	0.0420196
ko04150	mTOR signaling pathway	75	0.0420196
ko04068	FoxO signaling pathway	67	0.0441869
ko00240	Pyrimidine metabolism	52	0.0451071
